# Supplementary material for: Dynamic Alternative Splicing During Mouse Preimplantation Embryo Development
Source: Front Bioeng Biotechnol. 2020 Feb 7;8:35. doi: 10.3389/fbioe.2020.00035 (PMC7019016; doi:10.3389/fbioe.2020.00035)
Supplement: Table S5 — GO enrichment of DE genes between 2-cell and Zygote. [file Table_5.XLSX]

## Sheet: Zygote_2-cell_Up_BP
	ID	Description	GeneRatio	BgRatio	pvalue	p.adjust	qvalue	geneID	Count
GO:0022613	GO:0022613	ribonucleoprotein complex biogenesis	106/1188	420/23239	2.02303e-44	9.74898e-41	8.25184e-41	Snrpc/Rpl23a/Nol11/Utp14b/Rps17/Rps19/Rps6/Rbm5/Rps23/Ncbp1/Znhit3/Clp1/Rpl6/Rps2/Ago2/Srsf1/C1d/Imp3/Rpl24/Rps24/Noc2l/Ruvbl1/Rpl10l/Nufip1/Zfp622/Setx/G3bp1/Rps21/Fbl/Tbl3/Nop2/Nhp2/Srsf6/Nop16/Mdn1/Pdcd11/Rps25/Rps15/Rpl12/Pten/Rpsa/Sirt1/Pa2g4/Rsl24d1/Tsr1/Ddx3x/Gnl3l/Cpsf6/Isg20l2/Pwp1/Ddx20/Mrpl20/Eif2a/Urb2/Snrpb/Cnot1/Utp23/Bop1/C1qbp/Rps8/Gemin2/Usp36/Denr/Rplp0/Rps7/Nom1/Rrp9/Tfb2m/Rpl3…	106
GO:0042254	GO:0042254	ribosome biogenesis	82/1188	278/23239	5.55444e-40	1.33834e-36	1.13281e-36	Rpl23a/Nol11/Utp14b/Rps17/Rps19/Rps6/Znhit3/Rpl6/Rps2/C1d/Imp3/Rpl24/Rps24/Noc2l/Rpl10l/Zfp622/Rps21/Fbl/Tbl3/Nop2/Nhp2/Nop16/Mdn1/Pdcd11/Rps25/Rps15/Rpl12/Pten/Rpsa/Sirt1/Pa2g4/Rsl24d1/Tsr1/Ddx3x/Gnl3l/Isg20l2/Pwp1/Mrpl20/Eif2a/Urb2/Utp23/Bop1/C1qbp/Rps8/Usp36/Rplp0/Rps7/Nom1/Rrp9/Tfb2m/Rpl35/Chd7/Znhit6/Nol9/Bysl/Rpl10a/Mrps7/Nip7/Rrs1/Rps5/Drosha/Utp14a/Traf7/Ran/Rrp15/Dis3/Emg1/Ddx27/Suv39h1/…	82
GO:0071826	GO:0071826	ribonucleoprotein complex subunit organization	56/1188	234/23239	1.09175e-22	1.75372e-19	1.4844e-19	Snrpc/Rpl23a/Rps19/Rbm5/Rps23/Ncbp1/Znhit3/Clp1/Rpl6/Rps2/Ago2/Srsf1/Rpl24/Ruvbl1/Rpl10l/Nufip1/Setx/G3bp1/Nop2/Srsf6/Mdn1/Rps25/Rps15/Rpl12/Rpsa/Rsl24d1/Ddx3x/Cpsf6/Ddx20/Mrpl20/Eif2a/Snrpb/Cnot1/Bop1/C1qbp/Gemin2/Denr/Rplp0/Znhit6/Mrps7/Nip7/Rrs1/Rps5/Traf7/Eif5/Lsm2/Vcp/Rpl11/Celf1/Rc3h1/Surf6/Rpl10/Eif4h/Kif5b/Rps14/Sf3b1	56
GO:0022618	GO:0022618	ribonucleoprotein complex assembly	54/1188	221/23239	2.21846e-22	2.67269e-19	2.26225e-19	Snrpc/Rpl23a/Rps19/Rbm5/Rps23/Ncbp1/Znhit3/Clp1/Rpl6/Rps2/Ago2/Srsf1/Rpl24/Ruvbl1/Rpl10l/Nufip1/Setx/G3bp1/Nop2/Srsf6/Mdn1/Rps25/Rps15/Rpl12/Rpsa/Rsl24d1/Ddx3x/Cpsf6/Ddx20/Mrpl20/Eif2a/Snrpb/Cnot1/Bop1/C1qbp/Gemin2/Denr/Rplp0/Znhit6/Mrps7/Nip7/Rrs1/Rps5/Traf7/Eif5/Lsm2/Rpl11/Celf1/Rc3h1/Surf6/Rpl10/Eif4h/Rps14/Sf3b1	54
GO:0034470	GO:0034470	ncRNA processing	66/1188	337/23239	2.27979e-21	2.19726e-18	1.85983e-18	Nol11/Utp14b/Rps17/Rps19/Trub2/Rps6/Ncbp1/Znhit3/Clp1/Ago2/C1d/Mettl2/Imp3/Rps24/Ints5/Gtpbp3/Rps21/Fbl/Tbl3/Nop2/Nhp2/Mdn1/Pdcd11/Rps15/Rpsa/Sirt1/Pa2g4/Grsf1/Tsr1/Tsen34/Qtrt1/Utp23/Elp6/Bop1/Rps8/Usp36/Rps7/Rrp9/Tfb2m/Rpl35/Chd7/Znhit6/Nol9/Tprkb/Bysl/Rpl10a/Rrs1/Drosha/Utp14a/Rrp15/Rpp14/Dis3/Emg1/Ddx27/Suv39h1/Aars/Rpl35a/Wdr55/Rpl11/Nob1/Lyar/Wdr36/Rpp40/Trmt10c/Ints3/Rps14	66
GO:0006364	GO:0006364	rRNA processing	48/1188	188/23239	6.58925e-21	5.29227e-18	4.47953e-18	Nol11/Utp14b/Rps17/Rps19/Rps6/Znhit3/C1d/Imp3/Rps24/Rps21/Fbl/Tbl3/Nop2/Nhp2/Mdn1/Pdcd11/Rps15/Rpsa/Sirt1/Pa2g4/Tsr1/Utp23/Bop1/Rps8/Usp36/Rps7/Rrp9/Tfb2m/Rpl35/Chd7/Znhit6/Nol9/Bysl/Rpl10a/Rrs1/Utp14a/Rrp15/Dis3/Emg1/Ddx27/Suv39h1/Rpl35a/Wdr55/Rpl11/Nob1/Lyar/Wdr36/Rps14	48
GO:0016072	GO:0016072	rRNA metabolic process	51/1188	218/23239	2.60921e-20	1.79625e-17	1.5204e-17	Nol11/Utp14b/Rps17/Rps19/Rps6/Znhit3/C1d/Imp3/Rps24/Rps21/Fbl/Tbl3/Nop2/Nhp2/Mdn1/Pdcd11/Rps15/Gtf3c1/Rpsa/Sirt1/Pa2g4/Tsr1/Pwp1/Utp23/Bop1/Rps8/Usp36/Rps7/Rrp9/Tfb2m/Rpl35/Chd7/Znhit6/Nol9/Bysl/Rpl10a/Rrs1/Drosha/Utp14a/Rrp15/Dis3/Emg1/Ddx27/Suv39h1/Rpl35a/Wdr55/Rpl11/Nob1/Lyar/Wdr36/Rps14	51
GO:0034660	GO:0034660	ncRNA metabolic process	74/1188	455/23239	6.74029e-19	4.06018e-16	3.43666e-16	Nol11/Btbd18/Utp14b/Rps17/Rps19/Trub2/Rps6/Ell2/Ncbp1/Znhit3/Clp1/Ago2/C1d/Mettl2/Imp3/Rps24/Ints5/Gtpbp3/Rps21/Fbl/Tbl3/Nop2/Nhp2/Ep300/Mdn1/Pdcd11/Rps15/Gtf3c1/Rpsa/Sirt1/Pa2g4/Grsf1/Tsr1/Tsen34/Qtrt1/Pwp1/Mars2/Iars/Utp23/Elp6/Bop1/Rps8/Usp36/Rps7/Rrp9/Tfb2m/Rpl35/Chd7/Znhit6/Nol9/Tprkb/Bysl/Rpl10a/Rrs1/Drosha/Utp14a/Rrp15/Rpp14/Dis3/Emg1/Ddx27/Suv39h1/Aars/Rpl35a/Wdr55/Rpl11/Rc3h1/Nob1/Lyar/W…	74
GO:0042255	GO:0042255	ribosome assembly	28/1188	72/23239	4.38764e-18	2.34934e-15	1.98855e-15	Rpl23a/Rps19/Rpl6/Rps2/Rpl24/Rpl10l/Nop2/Mdn1/Rps25/Rps15/Rpl12/Rpsa/Rsl24d1/Ddx3x/Mrpl20/Eif2a/Bop1/C1qbp/Rplp0/Mrps7/Nip7/Rrs1/Rps5/Traf7/Rpl11/Surf6/Rpl10/Rps14	28
GO:0016570	GO:0016570	histone modification	67/1188	422/23239	1.12797e-16	5.16342e-14	4.37047e-14	Rlf/Dr1/Cdk9/Mthfr/Kdm3a/Pim3/Brca2/Pcgf5/Ccna2/Mta2/Bend3/Ubr5/Kmt2c/Noc2l/Ruvbl1/Setd2/Akap8/Gm10093/Prkcd/Prmt6/Brpf1/Fbl/Ep300/Kansl1/Kdm4c/Wac/Jade1/Mcrs1/L3mbtl2/Ddb1/Atxn7l3/Sirt1/Crebbp/Hdac1/Rest/Pwp1/Ntmt1/Dot1l/Kat2b/Kansl3/Taf5l/Brd1/Huwe1/Kat2a/Setd5/Usp36/Atrx/Usp22/Rcor1/Kdm5a/Hdac6/Kdm5b/Ncoa1/Usp16/Ctcf/Suv39h1/Hcfc1/Arid5a/Rnf20/Kat6a/Jak2/Baz1b/Kansl2/Zfp335/Rif1/Msl2/Ncoa6	67
GO:0016569	GO:0016569	covalent chromatin modification	68/1188	433/23239	1.17862e-16	5.16342e-14	4.37047e-14	Rlf/Dr1/Cdk9/Mthfr/Kdm3a/Pim3/Brca2/Pcgf5/Ccna2/Mta2/Bend3/Ubr5/Kmt2c/Noc2l/Ruvbl1/Setd2/Akap8/Gm10093/Prkcd/Prmt6/Brpf1/Fbl/Ep300/Kansl1/Kdm4c/Wac/Jade1/Mcrs1/L3mbtl2/Ddb1/Atxn7l3/Sirt1/Crebbp/Hdac1/Rest/Pwp1/Ntmt1/Dot1l/Kat2b/Kansl3/Taf5l/Brd1/Huwe1/Kat2a/Setd5/Usp36/Atrx/Usp22/Rcor1/Kdm5a/Hdac6/Kdm5b/Ncoa1/Usp16/Ctcf/Suv39h1/Chd1/Hcfc1/Arid5a/Rnf20/Kat6a/Jak2/Baz1b/Kansl2/Zfp335/Rif1/Msl2/Ncoa6	68
GO:0002181	GO:0002181	cytoplasmic translation	28/1188	87/23239	1.37995e-15	5.54165e-13	4.69062e-13	Rpl9/Rplp1/Rps23/Rpl18/Rpl6/Rps2/Rpl24/Rps26/Etf1/Rps21/Rwdd1/Rpl39/Rpl8/Denr/Rplp0/Ythdf2/Rpl19/Rpl10a/Rpl30/Cpeb2/Rpl18a/Rps29/Eif5/Aars/Rpl35a/Rpl11/Rpl15/Eif4h	28
GO:0042273	GO:0042273	ribosomal large subunit biogenesis	27/1188	83/23239	3.2765e-15	1.21457e-12	1.02805e-12	Rpl23a/Znhit3/Rpl6/Rpl24/Noc2l/Rpl10l/Zfp622/Nop2/Nhp2/Nop16/Mdn1/Rpl12/Rsl24d1/Mrpl20/Bop1/Rplp0/Rpl35/Znhit6/Nol9/Rpl10a/Nip7/Rrs1/Traf7/Rpl35a/Rpl11/Surf6/Rpl10	27
GO:0042274	GO:0042274	ribosomal small subunit biogenesis	23/1188	64/23239	3.15701e-14	1.08669e-11	9.19805e-12	Nol11/Rps17/Rps19/Rps6/Rps2/Rps24/Rps21/Tbl3/Rps25/Rps15/Rpsa/Tsr1/Utp23/Rps8/Rps7/Nom1/Bysl/Mrps7/Rrs1/Rps5/Surf6/Nob1/Rps14	23
GO:0034248	GO:0034248	regulation of cellular amide metabolic process	55/1188	361/23239	3.67165e-13	1.17958e-10	9.98432e-11	Ppp1r15b/Ctsa/Rplp1/Shmt1/Tigar/Syncrip/Trub2/Ncbp1/Ago2/Poldip3/Eif4g2/Serp1/Ormdl3/Tpr/Rock1/Ppp1r15a/Plk3/Eif4g1/Rps3a1/Prkcd/Rps9/Rps3/Cnot8/Ep300/Larp1/Pa2g4/Ddx3x/Ptbp1/Eif2a/Otud6b/Cnot1/Eif3b/Mapkapk5/Eif3c/C1qbp/Pgam1/Tob1/Mknk2/Casc3/Ythdf2/Sesn2/Cpeb2/Eif4a3/Qk/Usp16/Eif5/Fxr2/Aars/Rc3h1/Rpl10/Hnrnpr/Eif2ak3/Trmt10c/Cnot10/Rock2	55
GO:0006397	GO:0006397	mRNA processing	61/1188	439/23239	1.18899e-12	3.5811e-10	3.03115e-10	Rbbp6/Snrpc/Cdk9/Ppp1r8/Syncrip/Trub2/Rbm5/Ncbp1/Clp1/Srsf1/Snrnp25/Sltm/Ppil1/Cwc22/Cstf2t/Setx/Pabpc1/Sf3b6/Srsf6/Pdcd11/Gpkow/U2af1/Grsf1/Tsen34/Cpsf6/Rest/Rbm8a2/Rnpc3/Ddx20/Ptbp1/Gm16381/Rbm8a/Tbrg4/Pde12/Snrpb/Gm13691/C1qbp/Gemin2/Casc3/Tra2a/Srrm2/Zpr1/Zc3h14/Bud31/Hnrnpm/Hnrnpf/Eif4a3/Qk/Lsm2/Cdc5l/Sf3b5/Zrsr1/Smndc1/Rnf20/Puf60/Celf1/Rbm15/Ybx1/Ssu72/Cdk12/Sf3b1	61
GO:0010608	GO:0010608	posttranscriptional regulation of gene expression	64/1188	487/23239	4.0951e-12	1.16084e-09	9.82569e-10	Ppp1r15b/Rplp1/Shmt1/Ppp1r8/Syncrip/Trub2/Ncbp1/Clp1/Ago2/Poldip3/Smg5/Eif4g2/Serp1/Tpr/Ppp1r15a/Eif4g1/Rps3a1/Rps9/Rps3/Cnot8/Ep300/Larp1/Ajuba/Pabpc4/Pa2g4/Ddx3x/Hnrnpa0/Ptbp1/Tbrg4/Pde12/Eif2a/Otud6b/Cnot1/Eif3b/Mapkapk5/Eif3c/C1qbp/Tob1/Mknk2/Casc3/Angel2/Ythdf2/Nacc2/Zc3h14/Sesn2/Drosha/Cpeb2/Hnrnpm/Gcnt2/Eif4a3/Qk/Usp16/Eif5/Fxr2/Aars/Map2k2/Rc3h1/Rpl10/Ybx1/Hnrnpr/Eif2ak3/E2f1/Trmt10c/Cnot…	64
GO:0097193	GO:0097193	intrinsic apoptotic signaling pathway	46/1188	291/23239	8.57524e-12	2.29578e-09	1.94322e-09	Bag5/Hipk1/Rnf7/Sgpp1/Pttg1ip/Brca2/Jmy/G2e3/Noc2l/Gpx1/Casp3/Zfp622/Trib3/P4hb/Cdkn2d/Rps3/Ep300/Sod2/Sirt1/Ero1l/Ddx3x/Hdac1/Snai1/Chek2/Mcl1/Serinc3/Bnip3/Rps7/Mtch2/Nacc2/Apaf1/Mybbp1a/Ivns1abp/Cdip1/Atf4/Ei24/Usp47/Pik3r1/Tpt1/Gsk3b/Rpl11/Jak2/Eif2ak3/E2f1/Ptpn1/Ddias	46
GO:0018205	GO:0018205	peptidyl-lysine modification	50/1188	337/23239	1.18175e-11	2.99729e-09	2.537e-09	Gcsh/Rlf/Dr1/Kdm3a/Brca2/Uspl1/Pias3/Bend3/Noc2l/Ruvbl1/Setd2/Lias/Prmt6/Brpf1/Ep300/Kansl1/Kdm4c/Jade1/Mcrs1/L3mbtl2/Sirt1/Crebbp/Gnl3l/Hdac1/Pwp1/Dot1l/Kat2b/Kansl3/Esco1/Taf5l/Brd1/Kat2a/Setd5/Atrx/Hdac6/Traf7/Eef1akmt1/Ncoa1/Ctcf/Suv39h1/Hcfc1/Arid5a/Kat6a/Kansl2/Senp3/Zfp335/Rif1/Gnl3/Msl2/Ncoa6	50
GO:0008380	GO:0008380	RNA splicing	52/1188	361/23239	1.42945e-11	3.44427e-09	2.91533e-09	Snrpc/Ppp1r8/Syncrip/Rbm5/Ncbp1/Clp1/Srsf1/Snrnp25/Ppil1/Rps26/Rps13/Cwc22/Setx/Pabpc1/Sf3b6/Srsf6/Gpkow/U2af1/Tsen34/Rest/Rbm8a2/Rnpc3/Ddx20/Ptbp1/Gm16381/Rbm8a/Snrpb/Gm13691/C1qbp/Gemin2/Casc3/Tra2a/Srrm2/Zpr1/Ivns1abp/Bud31/Hnrnpm/Hnrnpf/Eif4a3/Pik3r1/Qk/Lsm2/Cdc5l/Sf3b5/Zrsr1/Smndc1/Puf60/Celf1/Rbm15/Ybx1/Cdk12/Sf3b1	52
GO:0006281	GO:0006281	DNA repair	59/1188	442/23239	1.50562e-11	3.45503e-09	2.92445e-09	Yy1/Tigar/Cdk9/Fbxo6/Brca2/Smc6/Jmy/Ubr5/Fancm/Ruvbl1/Setd2/Psme4/Herc2/Setx/Tex15/Cdkn2d/Prmt6/Rps3/Parp2/Polq/Wrap53/Cdc14b/Mcrs1/Rfwd3/Ddb1/Tdp2/Sirt1/Terf2ip/Exd2/Chek2/Dclre1b/Huwe1/Zfyve26/Mms22l/Rad21/Pds5a/Parg/Atrx/Smg1/Usp47/Nabp1/Rbbp8/Rad17/Epc2/Suv39h1/Vcp/Rad51ap1/Usp1/Cdc5l/Trip13/Ube2v1/Smchd1/Dek/Ercc4/Dna2/Bach1/Rif1/Taok1/Ints3	59
GO:0006417	GO:0006417	regulation of translation	47/1188	317/23239	5.01724e-11	1.099e-08	9.3023e-09	Ppp1r15b/Rplp1/Shmt1/Syncrip/Trub2/Ncbp1/Ago2/Poldip3/Eif4g2/Serp1/Tpr/Ppp1r15a/Eif4g1/Rps3a1/Rps9/Rps3/Cnot8/Ep300/Larp1/Pa2g4/Ddx3x/Ptbp1/Eif2a/Otud6b/Cnot1/Eif3b/Mapkapk5/Eif3c/C1qbp/Tob1/Mknk2/Casc3/Ythdf2/Sesn2/Cpeb2/Eif4a3/Qk/Usp16/Eif5/Fxr2/Aars/Rc3h1/Rpl10/Hnrnpr/Eif2ak3/Trmt10c/Cnot10	47
GO:0033044	GO:0033044	regulation of chromosome organization	49/1188	346/23239	1.01974e-10	2.13657e-08	1.80846e-08	Cdk9/Mad2l1bp/Mthfr/Kdm3a/Smg5/Apc/Cul3/Tpr/Ubr5/Noc2l/Akap8/Prmt6/Ep300/Prkcq/Kdm4c/Wapl/Mcrs1/L3mbtl2/Sirt1/Dync1li1/Terf2ip/Gnl3l/Atad2b/Kat2b/Hmbox1/Khdc3/Mapkapk5/Kat2a/Setd5/Rad21/Atad2/Atrx/Smg1/Hira/Tlk2/Kdm5a/Cep192/Ctcf/Suv39h1/Mki67/Arid5a/Trip13/Rnf20/Ercc4/Nek2/Zfp335/Rif1/Tcp1/Gnl3	49
GO:0006401	GO:0006401	RNA catabolic process	38/1188	229/23239	1.30561e-10	2.62157e-08	2.21897e-08	Syncrip/Ncbp1/Ago2/Smg5/Etf1/Pabpc1/Cnot8/Larp1/Pabpc4/Zc3hav1/Rbm8a2/Hnrnpa0/Ptbp1/Rbm8a/Tbrg4/Pde12/Cnot1/Csde1/Tob1/Smg1/Casc3/Angel2/Ythdf2/Zpr1/Zc3h14/Drosha/Hnrnpm/Eif4a3/Qk/Dis3/Lsm2/Fxr2/Rc3h1/Dna2/Ybx1/Hnrnpr/E2f1/Cnot10	38
GO:1903311	GO:1903311	regulation of mRNA metabolic process	39/1188	241/23239	1.61492e-10	3.11292e-08	2.63487e-08	Cdk9/Syncrip/Rbm5/Ncbp1/Ago2/Srsf1/Sltm/Pabpc1/Cnot8/Srsf6/Larp1/Pabpc4/Zc3hav1/Cpsf6/Rest/Rbm8a2/Hnrnpa0/Ptbp1/Rbm8a/Tbrg4/Pde12/Cnot1/C1qbp/Tob1/Tra2a/Angel2/Ythdf2/Zc3h14/Hnrnpm/Eif4a3/Qk/Fxr2/Rnf20/Celf1/Rc3h1/Rbm15/Ybx1/Hnrnpr/E2f1	39
GO:0070646	GO:0070646	protein modification by small protein removal	28/1188	136/23239	2.23588e-10	4.14411e-08	3.5077e-08	Uspl1/Spata2/Ubxn1/Atxn7l3/Usp37/Usp50/Otud6b/Kat2a/Eif3f/Cops6/Usp36/Usp22/Usp47/Otud4/Tnip1/Gps1/Usp42/Usp38/Usp34/Usp16/Cops7a/Vcp/Usp1/Usp24/Senp3/Usp29/Usp12/Usp33	28
GO:0000027	GO:0000027	ribosomal large subunit assembly	15/1188	39/23239	3.07709e-10	5.49203e-08	4.64862e-08	Rpl23a/Rpl6/Rpl24/Rpl10l/Nop2/Mdn1/Rpl12/Rsl24d1/Mrpl20/Bop1/Rplp0/Rrs1/Traf7/Rpl11/Rpl10	15
GO:0006402	GO:0006402	mRNA catabolic process	34/1188	198/23239	4.79979e-10	8.26079e-08	6.99218e-08	Syncrip/Ncbp1/Ago2/Smg5/Etf1/Pabpc1/Cnot8/Larp1/Pabpc4/Zc3hav1/Rbm8a2/Hnrnpa0/Ptbp1/Rbm8a/Tbrg4/Pde12/Cnot1/Csde1/Tob1/Smg1/Casc3/Angel2/Ythdf2/Zc3h14/Hnrnpm/Eif4a3/Qk/Lsm2/Fxr2/Rc3h1/Ybx1/Hnrnpr/E2f1/Cnot10	34
GO:0006413	GO:0006413	translational initiation	24/1188	106/23239	5.57554e-10	9.26501e-08	7.84218e-08	Dhx33/Ppp1r15b/Ncbp1/Rps2/Ago2/Eif4g2/Tpr/Ppp1r15a/Eif4g1/Eif1a/Larp1/Ddx3x/Eif2a/Eif3b/Eif3c/Eif3h/Eif3f/Denr/Ythdf2/Eif5/Eif4h/Eif2ak3/Eif1/Eif2b4	24
GO:0006913	GO:0006913	nucleocytoplasmic transport	44/1188	307/23239	6.24149e-10	9.7025e-08	8.21249e-08	Kpna1/Ncbp1/Pttg1ip/Vhl/Poldip3/Tpr/Rangap1/Ubr5/Tnpo3/Setd2/Cdk1/Ppp1cc/Prkcd/Ep300/Prkcq/Cited1/Ppm1a/Rps15/Ipo5/Xpot/Rpsa/Sirt1/Pa2g4/Ptpn11/Cpsf6/Mapk14/Ranbp2/Kpna6/Xpo6/Lsg1/Zpr1/Rrs1/Ei24/Ran/Pik3r1/Ppp1r12a/Xpo1/Gsk3b/Nf1/Jak2/Ipo4/Chp1/Snupn/Ipo9	44
GO:0051169	GO:0051169	nuclear transport	44/1188	307/23239	6.24149e-10	9.7025e-08	8.21249e-08	Kpna1/Ncbp1/Pttg1ip/Vhl/Poldip3/Tpr/Rangap1/Ubr5/Tnpo3/Setd2/Cdk1/Ppp1cc/Prkcd/Ep300/Prkcq/Cited1/Ppm1a/Rps15/Ipo5/Xpot/Rpsa/Sirt1/Pa2g4/Ptpn11/Cpsf6/Mapk14/Ranbp2/Kpna6/Xpo6/Lsg1/Zpr1/Rrs1/Ei24/Ran/Pik3r1/Ppp1r12a/Xpo1/Gsk3b/Nf1/Jak2/Ipo4/Chp1/Snupn/Ipo9	44
GO:0006473	GO:0006473	protein acetylation	32/1188	183/23239	9.66459e-10	1.45543e-07	1.23192e-07	Dr1/Brca2/Bend3/Noc2l/Ruvbl1/Mdh2/Brpf1/Ep300/Kansl1/Jade1/Mcrs1/L3mbtl2/Sirt1/Crebbp/Terf2ip/Hdac1/Kat2b/Kansl3/Esco1/Taf5l/Brd1/Kat2a/Setd5/Ncoa1/Ctcf/Hcfc1/Arid5a/Gsk3b/Kat6a/Kansl2/Taok1/Msl2	32
GO:2001233	GO:2001233	regulation of apoptotic signaling pathway	51/1188	404/23239	2.58516e-09	3.77511e-07	3.19537e-07	Tnfrsf22/Bag5/Ctsc/Zc3hc1/Tnfrsf12a/Pttg1ip/Vhl/G2e3/Noc2l/Gpx1/P4hb/Prkcd/Cdkn2d/Rps3/Gata1/Dedd2/Traf2/Pten/Sod2/Sirt1/Ddx3x/Hdac1/Snai1/Rb1cc1/Mcl1/Pak2/Serinc3/Bnip3/Cttn/Rps7/Map3k7/Mtch2/Nacc2/Apaf1/Ivns1abp/Ei24/Usp47/Traf7/Gnai2/Raf1/Siva1/Fem1b/Tpt1/Gsk3b/Nf1/Rpl11/Jak2/Eif2ak3/Prelid1/Ptpn1/Ddias	51
GO:0018394	GO:0018394	peptidyl-lysine acetylation	28/1188	153/23239	3.73335e-09	5.29148e-07	4.47887e-07	Dr1/Brca2/Bend3/Noc2l/Ruvbl1/Brpf1/Ep300/Kansl1/Jade1/Mcrs1/L3mbtl2/Sirt1/Crebbp/Hdac1/Kat2b/Kansl3/Esco1/Taf5l/Brd1/Kat2a/Setd5/Ncoa1/Ctcf/Hcfc1/Arid5a/Kat6a/Kansl2/Msl2	28
GO:0006475	GO:0006475	internal protein amino acid acetylation	27/1188	145/23239	4.77812e-09	6.57879e-07	5.56849e-07	Dr1/Brca2/Bend3/Noc2l/Ruvbl1/Mdh2/Brpf1/Ep300/Kansl1/Jade1/Mcrs1/L3mbtl2/Sirt1/Crebbp/Kat2b/Kansl3/Taf5l/Brd1/Kat2a/Setd5/Ncoa1/Ctcf/Hcfc1/Arid5a/Kat6a/Kansl2/Msl2	27
GO:0034504	GO:0034504	protein localization to nucleus	40/1188	282/23239	5.05283e-09	6.76378e-07	5.72507e-07	Kpna1/Tor1aip2/Pttg1ip/Vhl/Pin1/Tpr/Rangap1/Ubr5/Tnpo3/Cdk1/Prkcd/Ep300/Prkcq/Wrap53/Ipo5/Mcrs1/Sirt1/Nf2/Mapk14/Ranbp2/Kpna6/Tor1aip1/Arl2bp/Zpr1/Rrs1/Sesn2/Ei24/Hnrnpm/Ran/Pik3r1/Xpo1/Gsk3b/Nf1/Rpl11/Jak2/Ipo4/Chp1/Snupn/Ipo9/Eif2ak3	40
GO:0016573	GO:0016573	histone acetylation	26/1188	137/23239	6.04966e-09	7.87927e-07	6.66925e-07	Dr1/Brca2/Bend3/Noc2l/Ruvbl1/Brpf1/Ep300/Kansl1/Jade1/Mcrs1/L3mbtl2/Sirt1/Crebbp/Kat2b/Kansl3/Taf5l/Brd1/Kat2a/Setd5/Ncoa1/Ctcf/Hcfc1/Arid5a/Kat6a/Kansl2/Msl2	26
GO:0051052	GO:0051052	regulation of DNA metabolic process	52/1188	428/23239	6.80056e-09	8.62418e-07	7.29977e-07	Rbbp6/Tigar/Rlf/Cdk9/Brca2/Smg5/Ccna2/Ubr5/Ttf1/Setd2/Cdk1/Prkcd/Tex15/Nmnat1/Rps3/Prkcq/Polq/Wrap53/Wapl/Mcrs1/Sirt1/Terf2ip/Gnl3l/Cdan1/Usp37/Chek2/Hmbox1/Esco1/Mapkapk5/Tfrc/Pds5a/Parg/Atrx/Smg1/Apaf1/Dbf4/Otud4/Rad17/Suv39h1/Rad51ap1/Usp1/Stag2/Gsk3b/Smchd1/Dek/Ercc4/Dna2/Nek2/Rif1/Pik3ca/Tcp1/Gnl3	52
GO:0061013	GO:0061013	regulation of mRNA catabolic process	23/1188	111/23239	7.87324e-09	9.7285e-07	8.23449e-07	Syncrip/Ago2/Pabpc1/Cnot8/Larp1/Pabpc4/Zc3hav1/Hnrnpa0/Ptbp1/Tbrg4/Pde12/Cnot1/Tob1/Angel2/Ythdf2/Zc3h14/Hnrnpm/Qk/Fxr2/Rc3h1/Ybx1/Hnrnpr/E2f1	23
GO:0007059	GO:0007059	chromosome segregation	42/1188	311/23239	9.1981e-09	1.0657e-06	9.02039e-07	Mad2l1bp/Brca2/Smc6/Apc/Cul3/Tpr/Fancm/Akap8/Tex15/Rps3/Cdc14b/Wapl/Ccne1/Dync1li1/Ddx3x/Ntmt1/Esco1/Khdc3/Ska1/Cenpt/Ncapd2/Rad21/Pds5a/Atrx/Hira/Tlk2/Rrs1/Racgap1/Ran/Cep192/Ska3/Ctcf/Nde1/Stag2/Mki67/Trip13/Phf23/Spc25/Ercc4/Smc1b/Espl1/Nek2	42
GO:1903008	GO:1903008	organelle disassembly	20/1188	86/23239	9.22107e-09	1.0657e-06	9.02039e-07	Tigar/Map1lc3b/Wipi2/Plk3/Wdr45b/Cdk1/Ulk1/Fundc1/Rb1cc1/Map1lc3a/Bnip3/Denr/Cttn/Wdr45/Gabarapl2/Hdac6/Vcp/Atg13/Atg9a/Kif5b	20
GO:2001020	GO:2001020	regulation of response to DNA damage stimulus	32/1188	200/23239	9.28809e-09	1.0657e-06	9.02039e-07	Tigar/Cdk9/Pttg1ip/Ubr5/Setd2/Prkcd/Tex15/Cdkn2d/Rps3/Polq/Wrap53/Rfwd3/Sirt1/Terf2ip/Snai1/Chek2/Mcl1/Parg/Mtch2/Smg1/Nacc2/Usp47/Suv39h1/Rad51ap1/Usp1/Fem1b/Tpt1/Smchd1/Dek/Ercc4/Rif1/Ddias	32
GO:0018393	GO:0018393	internal peptidyl-lysine acetylation	26/1188	142/23239	1.32184e-08	1.48139e-06	1.25389e-06	Dr1/Brca2/Bend3/Noc2l/Ruvbl1/Brpf1/Ep300/Kansl1/Jade1/Mcrs1/L3mbtl2/Sirt1/Crebbp/Kat2b/Kansl3/Taf5l/Brd1/Kat2a/Setd5/Ncoa1/Ctcf/Hcfc1/Arid5a/Kat6a/Kansl2/Msl2	26
GO:0043543	GO:0043543	protein acylation	34/1188	226/23239	1.601e-08	1.75346e-06	1.48418e-06	Dr1/Brca2/Bend3/Noc2l/Ruvbl1/Mdh2/Brpf1/Zdhhc7/Ep300/Kansl1/Ppm1a/Jade1/Mcrs1/L3mbtl2/Sirt1/Crebbp/Terf2ip/Hdac1/Kat2b/Kansl3/Esco1/Taf5l/Brd1/Kat2a/Setd5/Ncoa1/Ctcf/Hcfc1/Arid5a/Gsk3b/Kat6a/Kansl2/Taok1/Msl2	34
GO:0016579	GO:0016579	protein deubiquitination	23/1188	116/23239	1.90188e-08	2.0367e-06	1.72393e-06	Spata2/Ubxn1/Atxn7l3/Usp37/Usp50/Otud6b/Kat2a/Eif3f/Usp36/Usp22/Usp47/Otud4/Tnip1/Usp42/Usp38/Usp34/Usp16/Vcp/Usp1/Usp24/Usp29/Usp12/Usp33	23
GO:0045786	GO:0045786	negative regulation of cell cycle	52/1188	445/23239	2.52515e-08	2.64537e-06	2.23912e-06	Cdk9/Rps6/Ppm1g/Mad2l1bp/Apc/Rpl24/Jmy/Tpr/Plk3/Casp3/Cdk1/Prr11/Cdkn2d/Pla2g16/Cdc14b/Wapl/Wac/Jade1/Rfwd3/Pten/Dync1li1/Ptpn11/Mapk14/Dot1l/Kat2b/Chek2/Khdc3/Dclre1b/Tiprl/Kat2a/Rad21/Rpl23/Atrx/Angel2/Nacc2/Med25/Zbtb17/Mybbp1a/Usp47/Nabp1/Cep192/Rad17/Cdc5l/Stag2/Fem1b/Trip13/Dna2/E2f1/Nek2/Taok1/Ints3/Ddias	52
GO:0046822	GO:0046822	regulation of nucleocytoplasmic transport	24/1188	128/23239	2.9415e-08	3.01598e-06	2.55282e-06	Tpr/Rangap1/Ubr5/Setd2/Cdk1/Ppp1cc/Prkcd/Ep300/Prkcq/Ppm1a/Ipo5/Sirt1/Ptpn11/Cpsf6/Mapk14/Zpr1/Ei24/Pik3r1/Ppp1r12a/Xpo1/Gsk3b/Nf1/Jak2/Chp1	24
GO:0034655	GO:0034655	nucleobase-containing compound catabolic process	48/1188	401/23239	4.11662e-08	4.13292e-06	3.49823e-06	Dhtkd1/Tigar/Syncrip/Ncbp1/Ago2/Smg5/Etf1/Nudt4/Pabpc1/Nmnat1/Cnot8/Upp1/Larp1/Pabpc4/Zc3hav1/Rbm8a2/Hnrnpa0/Ptbp1/Rbm8a/Ldha/Tbrg4/Pde12/Cnot1/Csde1/Pgam1/Tob1/Mtch2/Smg1/Casc3/Angel2/Ythdf2/Apaf1/Zpr1/Zc3h14/Drosha/Hnrnpm/Eif4a3/Qk/Dis3/Lsm2/Vcp/Fxr2/Rc3h1/Dna2/Ybx1/Hnrnpr/E2f1/Cnot10	48
GO:0001824	GO:0001824	blastocyst development	25/1188	145/23239	8.59121e-08	8.42866e-06	7.13427e-06	Gabpa/Crxos/Brca2/Uspl1/Pemt/Cul3/G2e3/Ubtfl1/Stmn3/Spic/Sf3b6/Nop2/Rtn4/Kdm4c/Slc35e2/Cnot1/Ncapg2/Bysl/Zpr1/Rbbp8/Emg1/Suv39h1/Hcfc1/Nek2/Sf3b1	25
GO:0000075	GO:0000075	cell cycle checkpoint	28/1188	176/23239	8.74524e-08	8.42866e-06	7.13427e-06	Rps6/Mad2l1bp/Apc/Rpl24/Tpr/Plk3/Cdk1/Cdc14b/Wac/Rfwd3/Dync1li1/Ptpn11/Mapk14/Dot1l/Chek2/Khdc3/Dclre1b/Tiprl/Nabp1/Cep192/Rad17/Cdc5l/Fem1b/Trip13/Dna2/E2f1/Taok1/Ints3	28
GO:0044772	GO:0044772	mitotic cell cycle phase transition	42/1188	344/23239	1.66059e-07	1.5691e-05	1.32813e-05	Cdc25c/Rps6/Mad2l1bp/Apc/Ccna2/Rpl24/Cul3/Tpr/Plk3/Eif4g1/Cdk1/Cdkn2d/Prkcq/Cdc14b/Jade1/Rfwd3/Ccne1/Ddb1/Pten/Taf2/Crebbp/Dync1li1/Ddx3x/Usp37/Chek2/Ube2c/Khdc3/Rad21/Npat/Nacc2/Dbf4/Zpr1/Usp47/Calm2/Cep192/Rbbp8/Rad17/Ccnd3/Trip13/E2f1/Bach1/Taok1	42
GO:0034249	GO:0034249	negative regulation of cellular amide metabolic process	25/1188	150/23239	1.6959e-07	1.57164e-05	1.33029e-05	Ctsa/Shmt1/Syncrip/Ago2/Ormdl3/Tpr/Rock1/Eif4g1/Rps3/Cnot8/Larp1/Ddx3x/Otud6b/Cnot1/Tob1/Ythdf2/Sesn2/Cpeb2/Eif4a3/Qk/Fxr2/Rc3h1/Hnrnpr/Eif2ak3/Cnot10	25
GO:0051099	GO:0051099	positive regulation of binding	30/1188	205/23239	2.05065e-07	1.86454e-05	1.57821e-05	Krit1/Hipk1/Syap1/Cdk9/Ncbp1/Map1lc3b/Pin1/Eif4g1/Trib3/Sppl3/Ep300/Wapl/Traf2/Bambi/Ppp2cb/Mark3/Gnl3l/Hipk3/Kat2b/Hmbox1/Eif3c/Edf1/Med25/Ran/Gsk3b/Rpl11/Jak2/Eif2ak3/Usp33/Eif2b4	30
GO:2001251	GO:2001251	negative regulation of chromosome organization	24/1188	145/23239	3.39649e-07	3.0014e-05	2.54048e-05	Mad2l1bp/Kdm3a/Apc/Tpr/Ubr5/Noc2l/Prmt6/Kdm4c/Wapl/Mcrs1/L3mbtl2/Sirt1/Dync1li1/Terf2ip/Gnl3l/Atad2b/Khdc3/Rad21/Atad2/Atrx/Kdm5a/Cep192/Trip13/Ercc4	24
GO:2001242	GO:2001242	regulation of intrinsic apoptotic signaling pathway	26/1188	166/23239	3.42555e-07	3.0014e-05	2.54048e-05	Bag5/Pttg1ip/G2e3/Noc2l/Gpx1/P4hb/Cdkn2d/Rps3/Sod2/Sirt1/Ddx3x/Hdac1/Snai1/Mcl1/Serinc3/Rps7/Mtch2/Nacc2/Ivns1abp/Ei24/Usp47/Tpt1/Rpl11/Eif2ak3/Ptpn1/Ddias	26
GO:1902275	GO:1902275	regulation of chromatin organization	28/1188	188/23239	3.58079e-07	3.0814e-05	2.60819e-05	Cdk9/Mthfr/Kdm3a/Tpr/Ubr5/Noc2l/Akap8/Prmt6/Ep300/Kdm4c/L3mbtl2/Sirt1/Atad2b/Kat2b/Kat2a/Setd5/Atad2/Atrx/Hira/Tlk2/Kdm5a/Ctcf/Suv39h1/Mki67/Arid5a/Rnf20/Zfp335/Rif1	28
GO:0000375	GO:0000375	RNA splicing, via transesterification reactions	33/1188	246/23239	4.08671e-07	3.31422e-05	2.80526e-05	Snrpc/Rbm5/Ncbp1/Srsf1/Ppil1/Cwc22/Setx/Sf3b6/Srsf6/Gpkow/U2af1/Rest/Rbm8a2/Rnpc3/Ddx20/Ptbp1/Gm16381/Rbm8a/Snrpb/Gm13691/C1qbp/Gemin2/Tra2a/Bud31/Hnrnpm/Eif4a3/Lsm2/Cdc5l/Sf3b5/Zrsr1/Celf1/Rbm15/Sf3b1	33
GO:0000377	GO:0000377	RNA splicing, via transesterification reactions with bulged adenosine as nucleophile	33/1188	246/23239	4.08671e-07	3.31422e-05	2.80526e-05	Snrpc/Rbm5/Ncbp1/Srsf1/Ppil1/Cwc22/Setx/Sf3b6/Srsf6/Gpkow/U2af1/Rest/Rbm8a2/Rnpc3/Ddx20/Ptbp1/Gm16381/Rbm8a/Snrpb/Gm13691/C1qbp/Gemin2/Tra2a/Bud31/Hnrnpm/Eif4a3/Lsm2/Cdc5l/Sf3b5/Zrsr1/Celf1/Rbm15/Sf3b1	33
GO:0000398	GO:0000398	mRNA splicing, via spliceosome	33/1188	246/23239	4.08671e-07	3.31422e-05	2.80526e-05	Snrpc/Rbm5/Ncbp1/Srsf1/Ppil1/Cwc22/Setx/Sf3b6/Srsf6/Gpkow/U2af1/Rest/Rbm8a2/Rnpc3/Ddx20/Ptbp1/Gm16381/Rbm8a/Snrpb/Gm13691/C1qbp/Gemin2/Tra2a/Bud31/Hnrnpm/Eif4a3/Lsm2/Cdc5l/Sf3b5/Zrsr1/Celf1/Rbm15/Sf3b1	33
GO:0044770	GO:0044770	cell cycle phase transition	44/1188	381/23239	4.12645e-07	3.31422e-05	2.80526e-05	Cdc25c/Rps6/Mad2l1bp/Apc/Ccna2/Rpl24/Cul3/Tpr/Plk3/Eif4g1/Cdk1/Akap8/Cdkn2d/Prkcq/Cdc14b/Jade1/Rfwd3/Ccne1/Ddb1/Pten/Taf2/Crebbp/Dync1li1/Ddx3x/Usp37/Chek2/Ube2c/Khdc3/Rad21/Npat/Ube2l3/Nacc2/Dbf4/Zpr1/Usp47/Calm2/Cep192/Rbbp8/Rad17/Ccnd3/Trip13/E2f1/Bach1/Taok1	44
GO:0051438	GO:0051438	regulation of ubiquitin-protein transferase activity	13/1188	47/23239	4.21828e-07	3.33244e-05	2.82068e-05	Bag5/Rps2/Pin1/Trib3/Cdc14b/Pten/Smad7/Zyg11b/Rps7/Rpl23/Ube2l3/Fem1b/Rpl11	13
GO:0000422	GO:0000422	autophagy of mitochondrion	15/1188	64/23239	5.85189e-07	4.43887e-05	3.7572e-05	Tigar/Map1lc3b/Wipi2/Wdr45b/Ulk1/Fundc1/Rb1cc1/Map1lc3a/Bnip3/Cttn/Wdr45/Gabarapl2/Hdac6/Atg13/Atg9a	15
GO:0061726	GO:0061726	mitochondrion disassembly	15/1188	64/23239	5.85189e-07	4.43887e-05	3.7572e-05	Tigar/Map1lc3b/Wipi2/Wdr45b/Ulk1/Fundc1/Rb1cc1/Map1lc3a/Bnip3/Cttn/Wdr45/Gabarapl2/Hdac6/Atg13/Atg9a	15
GO:0044270	GO:0044270	cellular nitrogen compound catabolic process	48/1188	438/23239	5.89516e-07	4.43887e-05	3.7572e-05	Dhtkd1/Tigar/Syncrip/Ncbp1/Ago2/Smg5/Etf1/Nudt4/Pabpc1/Nmnat1/Cnot8/Upp1/Larp1/Pabpc4/Zc3hav1/Rbm8a2/Hnrnpa0/Ptbp1/Rbm8a/Ldha/Tbrg4/Pde12/Cnot1/Csde1/Pgam1/Tob1/Mtch2/Smg1/Casc3/Angel2/Ythdf2/Apaf1/Zpr1/Zc3h14/Drosha/Hnrnpm/Eif4a3/Qk/Dis3/Lsm2/Vcp/Fxr2/Rc3h1/Dna2/Ybx1/Hnrnpr/E2f1/Cnot10	48
GO:0006302	GO:0006302	double-strand break repair	29/1188	204/23239	6.04782e-07	4.48376e-05	3.79519e-05	Yy1/Brca2/Smc6/Ubr5/Setd2/Setx/Tex15/Parp2/Polq/Wrap53/Rfwd3/Tdp2/Terf2ip/Exd2/Chek2/Dclre1b/Zfyve26/Mms22l/Rad21/Nabp1/Rbbp8/Vcp/Rad51ap1/Trip13/Smchd1/Dek/Ercc4/Dna2/Rif1	29
GO:0006403	GO:0006403	RNA localization	26/1188	171/23239	6.18045e-07	4.51267e-05	3.81966e-05	Tomm20/Yy1/Ncbp1/Znhit3/Poldip3/Srsf1/Tpr/Setd2/Ahctf1/Fbl/Wrap53/Rps15/Xpot/Rpsa/Pa2g4/Cpsf6/Ranbp2/Casc3/Znhit6/Myo1c/Rrs1/Ran/Qk/Xpo1/Snupn/Tcp1	26
GO:0001701	GO:0001701	in utero embryonic development	52/1188	494/23239	7.0134e-07	5.04441e-05	4.26975e-05	Rbbp6/Slc34a2/Cdk2ap1/Gabpa/Crxos/Pitpnb/Socs3/Brca2/Uspl1/Pemt/Srsf1/Slc30a1/Cul3/G2e3/Ubtfl1/Setd2/Ttn/Stmn3/Spic/Tbx3/Sf3b6/Nop2/Gata1/Rtn4/Cited1/Kdm4c/Ovol2/Slc35e2/Snai1/C2cd3/Cnot1/Kat2a/Mafg/Slc39a1/Llgl2/Chd7/Ncapg2/Bysl/Zpr1/Ubr3/Ncoa1/Rbbp8/Emg1/Suv39h1/Hcfc1/Nckap1/Ybx1/Nek2/Zfp335/Hectd1/Ncoa6/Sf3b1	52
GO:0030490	GO:0030490	maturation of SSU-rRNA	12/1188	42/23239	7.99448e-07	5.6655e-05	4.79545e-05	Nol11/Rps19/Rps21/Tbl3/Rpsa/Tsr1/Utp23/Rps8/Bysl/Rrs1/Nob1/Rps14	12
GO:0072594	GO:0072594	establishment of protein localization to organelle	43/1188	378/23239	8.37864e-07	5.85169e-05	4.95305e-05	Tomm20/Kpna1/Folr1/Pttg1ip/Vhl/Brca2/Tpr/Ubr5/Tnpo3/Cdk1/Prkcd/Lamp2/Tomm5/Tomm22/Ep300/Prkcq/Wrap53/Ipo5/Sirt1/Sec61a2/Mapk14/Timm8a1/Ranbp2/Kpna6/Pmm1/Timm17b/Mtch2/Srpr/Zpr1/Tomm40/Snf8/Ei24/Ran/Pik3r1/Nf1/Ap3d1/Gcc2/Jak2/Ipo4/Chp1/Snupn/Ipo9/Tcp1	43
GO:1903320	GO:1903320	regulation of protein modification by small protein conjugation or removal	30/1188	219/23239	8.67917e-07	5.93106e-05	5.02023e-05	Bag5/Cdk9/Pttg1ip/Rps2/Pias3/Pin1/Cul3/Ubr5/Trib3/Rps3/Cdc14b/Ubxn1/Pten/Gnl3l/Smad7/Zyg11b/Rps7/Rpl23/Ube2l3/Ivns1abp/Traf7/Otud4/Tnip1/Vcp/Fem1b/Rpl11/Rnf20/Phf23/Chp1/Gnl3	30
GO:0046700	GO:0046700	heterocycle catabolic process	48/1188	444/23239	8.73844e-07	5.93106e-05	5.02023e-05	Dhtkd1/Tigar/Syncrip/Ncbp1/Ago2/Smg5/Etf1/Nudt4/Pabpc1/Nmnat1/Cnot8/Upp1/Larp1/Pabpc4/Zc3hav1/Rbm8a2/Hnrnpa0/Ptbp1/Rbm8a/Ldha/Tbrg4/Pde12/Cnot1/Csde1/Pgam1/Tob1/Mtch2/Smg1/Casc3/Angel2/Ythdf2/Apaf1/Zpr1/Zc3h14/Drosha/Hnrnpm/Eif4a3/Qk/Dis3/Lsm2/Vcp/Fxr2/Rc3h1/Dna2/Ybx1/Hnrnpr/E2f1/Cnot10	48
GO:1900180	GO:1900180	regulation of protein localization to nucleus	22/1188	132/23239	9.1795e-07	6.14389e-05	5.20037e-05	Pin1/Tpr/Ubr5/Cdk1/Prkcd/Ep300/Prkcq/Ipo5/Mcrs1/Sirt1/Nf2/Mapk14/Zpr1/Sesn2/Ei24/Hnrnpm/Pik3r1/Gsk3b/Nf1/Jak2/Chp1/Eif2ak3	22
GO:0000209	GO:0000209	protein polyubiquitination	27/1188	186/23239	9.65363e-07	6.37272e-05	5.39406e-05	Mkrn1/Ube2o/Arih2/Cul3/G2e3/Ubr5/Ube2j2/Traf2/Tmem129/Rnf216/Ube2c/Huwe1/Cbl/Ube4b/Fbxw11/Cdc34b/Ube2l3/Hdac6/Rnf6/Ube3c/Dzip3/Ube2e3/Ube2v1/Rnf20/Rc3h1/Ttc3/Hectd1	27
GO:0017148	GO:0017148	negative regulation of translation	22/1188	133/23239	1.04752e-06	6.8216e-05	5.77401e-05	Shmt1/Syncrip/Ago2/Tpr/Eif4g1/Rps3/Cnot8/Larp1/Ddx3x/Otud6b/Cnot1/Tob1/Ythdf2/Sesn2/Cpeb2/Eif4a3/Qk/Fxr2/Rc3h1/Hnrnpr/Eif2ak3/Cnot10	22
GO:0016236	GO:0016236	macroautophagy	27/1188	188/23239	1.19435e-06	7.67413e-05	6.49561e-05	Tigar/Map1lc3b/Wipi2/Wdr45b/Lamp2/Ulk1/Wac/Larp1/Sirt1/Rab1a/Pip4k2c/Rb1cc1/Fyco1/Map1lc3a/Bnip3/Usp36/Map3k7/Wdr45/Sesn2/Ei24/Gabarapl2/Hdac6/Vcp/Atg13/Phf23/Atg9a/Tmem41b	27
GO:0000723	GO:0000723	telomere maintenance	21/1188	124/23239	1.23289e-06	7.81751e-05	6.61697e-05	Brca2/Smc6/Smg5/Nhp2/Prkcq/Wrap53/Mcrs1/Ccne1/Terf2ip/Gnl3l/Hmbox1/Dclre1b/Mapkapk5/Atrx/Smg1/Ercc4/Dna2/Nek2/Rif1/Tcp1/Gnl3	21
GO:0017038	GO:0017038	protein import	30/1188	225/23239	1.5409e-06	9.6436e-05	8.16264e-05	Tomm20/Kpna1/Pttg1ip/Vhl/Tpr/Ubr5/Tnpo3/Cdk1/Prkcd/Tomm22/Ep300/Prkcq/Ipo5/Sirt1/Mapk14/Ranbp2/Kpna6/Timm17b/Zpr1/Tomm40/Ei24/Hnrnpm/Ran/Pik3r1/Nf1/Jak2/Ipo4/Chp1/Snupn/Ipo9	30
GO:0043161	GO:0043161	proteasome-mediated ubiquitin-dependent protein catabolic process	42/1188	374/23239	1.56956e-06	9.69708e-05	8.2079e-05	Bag5/Gid4/Rnf7/Dnajb9/Gm5286/Gm9125/Fbxo6/Arih2/Fbxo45/Cul3/Plk3/Herc2/Trib3/Rmnd5b/Ube2j2/Ubxn1/Wac/Ddb1/Sirt1/Ppp2cb/Psmb5/Gm10696/Tmem129/Smad7/Rnf216/Tdpoz3/Ube2c/Ube4b/Ubxn8/Fbxw11/Csnk1a1/Cdc34b/Tlk2/Ubr3/Smarcc1/Wwtr1/Nub1/Vcp/Gsk3b/Rpl11/Zfand2a/Dda1	42
GO:0032200	GO:0032200	telomere organization	21/1188	126/23239	1.6132e-06	9.84051e-05	8.32931e-05	Brca2/Smc6/Smg5/Nhp2/Prkcq/Wrap53/Mcrs1/Ccne1/Terf2ip/Gnl3l/Hmbox1/Dclre1b/Mapkapk5/Atrx/Smg1/Ercc4/Dna2/Nek2/Rif1/Tcp1/Gnl3	21
GO:0043488	GO:0043488	regulation of mRNA stability	17/1188	87/23239	1.64696e-06	9.92086e-05	8.39732e-05	Syncrip/Larp1/Pabpc4/Hnrnpa0/Ptbp1/Tbrg4/Pde12/Angel2/Ythdf2/Zc3h14/Hnrnpm/Qk/Fxr2/Rc3h1/Ybx1/Hnrnpr/E2f1	17
GO:0006606	GO:0006606	protein import into nucleus	25/1188	169/23239	1.69469e-06	0.000100824	8.53402e-05	Kpna1/Pttg1ip/Vhl/Tpr/Ubr5/Tnpo3/Cdk1/Prkcd/Ep300/Prkcq/Ipo5/Sirt1/Mapk14/Ranbp2/Kpna6/Zpr1/Ei24/Ran/Pik3r1/Nf1/Jak2/Ipo4/Chp1/Snupn/Ipo9	25
GO:0090501	GO:0090501	RNA phosphodiester bond hydrolysis	14/1188	61/23239	1.81687e-06	0.000106774	9.03772e-05	Ncbp1/Ago2/Cstf2t/Rps21/Znrd1/Nhp2/Rpsa/Cpsf6/Pde12/Utp23/Bop1/Nol9/Rrs1/Nob1	14
GO:0000462	GO:0000462	maturation of SSU-rRNA from tricistronic rRNA transcript (SSU-rRNA, 5.8S rRNA, LSU-rRNA)	10/1188	31/23239	1.943e-06	0.000112811	9.54865e-05	Rps19/Rps21/Tbl3/Rpsa/Tsr1/Utp23/Rps8/Bysl/Rrs1/Rps14	10
GO:0043487	GO:0043487	regulation of RNA stability	18/1188	98/23239	2.10626e-06	0.000119542	0.000101184	Syncrip/Smg5/Larp1/Pabpc4/Hnrnpa0/Ptbp1/Tbrg4/Pde12/Angel2/Ythdf2/Zc3h14/Hnrnpm/Qk/Fxr2/Rc3h1/Ybx1/Hnrnpr/E2f1	18
GO:0019439	GO:0019439	aromatic compound catabolic process	48/1188	458/23239	2.10854e-06	0.000119542	0.000101184	Dhtkd1/Tigar/Syncrip/Ncbp1/Ago2/Smg5/Etf1/Nudt4/Pabpc1/Nmnat1/Cnot8/Upp1/Larp1/Pabpc4/Zc3hav1/Rbm8a2/Hnrnpa0/Ptbp1/Rbm8a/Ldha/Tbrg4/Pde12/Cnot1/Csde1/Pgam1/Tob1/Mtch2/Smg1/Casc3/Angel2/Ythdf2/Apaf1/Zpr1/Zc3h14/Drosha/Hnrnpm/Eif4a3/Qk/Dis3/Lsm2/Vcp/Fxr2/Rc3h1/Dna2/Ybx1/Hnrnpr/E2f1/Cnot10	48
GO:0043967	GO:0043967	histone H4 acetylation	14/1188	62/23239	2.23718e-06	0.00012536	0.000106109	Brca2/Bend3/Ruvbl1/Ep300/Kansl1/Jade1/Mcrs1/Sirt1/Kansl3/Kat2a/Ncoa1/Hcfc1/Kansl2/Msl2	14
GO:0006914	GO:0006914	autophagy	41/1188	367/23239	2.37591e-06	0.000130108	0.000110127	Calcoco2/Ctsa/Tigar/Map1lc3b/Wipi2/Eif4g2/Rock1/Plk3/Wdr45b/Rab39/Eif4g1/Lamp2/Ulk1/Fundc1/Wac/Larp1/Sirt1/Rab1a/Cptp/Pip4k2c/Rb1cc1/Mcl1/Fyco1/Map1lc3a/Bnip3/Usp36/Cttn/Map3k7/Wdr45/Sesn2/Ei24/Gabarapl2/Hdac6/Vcp/Atg13/Gsk3b/Phf23/Ercc4/Atg9a/Tmem41b/Usp33	41
GO:0061919	GO:0061919	process utilizing autophagic mechanism	41/1188	367/23239	2.37591e-06	0.000130108	0.000110127	Calcoco2/Ctsa/Tigar/Map1lc3b/Wipi2/Eif4g2/Rock1/Plk3/Wdr45b/Rab39/Eif4g1/Lamp2/Ulk1/Fundc1/Wac/Larp1/Sirt1/Rab1a/Cptp/Pip4k2c/Rb1cc1/Mcl1/Fyco1/Map1lc3a/Bnip3/Usp36/Cttn/Map3k7/Wdr45/Sesn2/Ei24/Gabarapl2/Hdac6/Vcp/Atg13/Gsk3b/Phf23/Ercc4/Atg9a/Tmem41b/Usp33	41
GO:0051170	GO:0051170	import into nucleus	25/1188	173/23239	2.617e-06	0.0001417	0.000119939	Kpna1/Pttg1ip/Vhl/Tpr/Ubr5/Tnpo3/Cdk1/Prkcd/Ep300/Prkcq/Ipo5/Sirt1/Mapk14/Ranbp2/Kpna6/Zpr1/Ei24/Ran/Pik3r1/Nf1/Jak2/Ipo4/Chp1/Snupn/Ipo9	25
GO:0034250	GO:0034250	positive regulation of cellular amide metabolic process	21/1188	130/23239	2.71105e-06	0.000145162	0.000122869	Trub2/Poldip3/Eif4g2/Serp1/Plk3/Rps3a1/Prkcd/Rps9/Ep300/Ddx3x/Ptbp1/Otud6b/Eif3c/C1qbp/Ythdf2/Eif4a3/Usp16/Fxr2/Eif2ak3/Trmt10c/Rock2	21
GO:0010498	GO:0010498	proteasomal protein catabolic process	46/1188	436/23239	2.8581e-06	0.000151239	0.000128013	Bag5/Gid4/Rnf7/Dnajb9/Gm5286/Gm9125/Fbxo6/Vhl/Arih2/Fbxo45/Cul3/Plk3/Gpx1/Psme4/Herc2/Trib3/Rmnd5b/Ube2j2/Ubxn1/Wac/Ddb1/Sirt1/Ppp2cb/Psmb5/Gm10696/Tmem129/Smad7/Rnf216/Tdpoz3/Ube2c/Ube4b/Ubxn8/Fbxw11/Csnk1a1/Cdc34b/Tlk2/Gabarapl2/Ubr3/Smarcc1/Wwtr1/Nub1/Vcp/Gsk3b/Rpl11/Zfand2a/Dda1	46
GO:0031647	GO:0031647	regulation of protein stability	32/1188	256/23239	2.88731e-06	0.000151239	0.000128013	Bag5/Ctsa/Pin1/Cul3/Ubr5/Lamp2/Ep300/Rtn4/Pten/Sirt1/Crebbp/Nf2/Gnl3l/Smad7/Chek2/Kat2a/Tesc/Fbxw11/Usp36/Rps7/Rpl23/Usp47/Hdac6/Pik3r1/Usp34/Hcfc1/Rpl11/Nckap1/Chp1/Ipo9/Tcp1/Usp33	32
GO:0033157	GO:0033157	regulation of intracellular protein transport	29/1188	221/23239	3.16303e-06	0.000163899	0.000138729	Tpr/Rangap1/Ubr5/Plk3/Setd2/Cdk1/Prkcd/Ep300/Prkcq/Ppm1a/Ipo5/Sirt1/Oaz1/Ptpn11/Mapk14/Sec16a/Zpr1/Myo1c/Ei24/Pik3r1/Snx3/Xpo1/Gsk3b/Nf1/Gcc2/Jak2/Chp1/Kif5b/Ptpn1	29
GO:0043414	GO:0043414	macromolecule methylation	34/1188	282/23239	3.22843e-06	0.000165509	0.000140092	Rlf/Mthfr/Kdm3a/Mettl2/Mta2/Bend3/Etf1/Kmt2c/Setd2/Gtpbp3/Prmt6/Fbl/Nop2/Kdm4c/L3mbtl2/Sirt1/Pwp1/Ntmt1/Dot1l/Snrpb/Atrx/Tfb2m/Eef1akmt1/Emg1/Ctcf/Suv39h1/Gsk3b/Rnf20/Rbm15/Zfp335/Rif1/Pik3ca/Trmt10c/Ncoa6	34
GO:0000028	GO:0000028	ribosomal small subunit assembly	8/1188	20/23239	3.30609e-06	0.000167706	0.000141951	Rps19/Rps2/Rps25/Rps15/Rpsa/Mrps7/Rps5/Rps14	8
GO:0008630	GO:0008630	intrinsic apoptotic signaling pathway in response to DNA damage	19/1188	112/23239	3.81247e-06	0.000189405	0.000160318	Hipk1/Brca2/Cdkn2d/Rps3/Ep300/Sod2/Sirt1/Snai1/Chek2/Mcl1/Mtch2/Nacc2/Cdip1/Ei24/Usp47/Pik3r1/Tpt1/E2f1/Ddias	19
GO:0090305	GO:0090305	nucleic acid phosphodiester bond hydrolysis	19/1188	112/23239	3.81247e-06	0.000189405	0.000160318	Ncbp1/Ago2/Cstf2t/Nmnat1/Rps21/Znrd1/Nhp2/Rpsa/Cpsf6/Exd2/Pde12/Utp23/Bop1/Nol9/Apaf1/Rrs1/Ercc4/Dna2/Nob1	19
GO:0034976	GO:0034976	response to endoplasmic reticulum stress	28/1188	213/23239	4.48938e-06	0.000220758	0.000186856	Ppp1r15b/Dnajb9/Fbxo6/Serp1/Ppp1r15a/Casp3/Trib3/P4hb/Tbl2/Ep300/Ube2j2/Ubxn1/Sirt1/Ppp2cb/Ero1l/Tmem129/Serinc3/Ube4b/Ubxn8/Apaf1/Sesn2/Atf4/Pik3r1/Vcp/Gsk3b/Ficd/Eif2ak3/Ptpn1	28
GO:0006323	GO:0006323	DNA packaging	24/1188	167/23239	4.54486e-06	0.000221229	0.000187255	Set/Mta2/Brd2/Tpr/Noc2l/Psme4/Cdk1/Akap8/Wapl/Cdan1/Ncapd2/Atrx/Ncapg2/Hira/Ubn1/Nap1l1/Cabin1/Smarcc1/Ctcf/Suv39h1/Smchd1/Kat6a/Phf23/Ipo4	24
GO:0007346	GO:0007346	regulation of mitotic cell cycle	50/1188	499/23239	4.68397e-06	0.00022572	0.000191057	Cdc25c/Rps6/Mad2l1bp/Pim3/Brca2/Apc/Ccna2/Rpl24/Cul3/Tpr/Plk3/Eif4g1/Cdk1/Prkcq/Ccnjl/Cdc14b/Jade1/Rfwd3/Ccne1/Ddb1/Pten/Sirt1/Crebbp/Dync1li1/Ddx3x/Ptpn11/Chek2/Ube2c/Khdc3/Dclre1b/Rad21/Atrx/Angel2/Nacc2/Dbf4/Usp22/Usp47/Nabp1/Cep192/Rad17/Ccnd3/Stag2/Mki67/Trip13/E2f1/Nek2/Pkn2/Taok1/Ints3/Ddias	50
GO:0010639	GO:0010639	negative regulation of organelle organization	42/1188	391/23239	4.88285e-06	0.000232653	0.000196924	Tigar/Mad2l1bp/Kdm3a/Apc/Tpr/Ubr5/Noc2l/Gpx1/Prkcd/Prmt6/Kank4/Kdm4c/Wapl/Mcrs1/L3mbtl2/Sirt1/Mkks/Dync1li1/Terf2ip/Gnl3l/Arfgef1/Atad2b/Kat2b/Khdc3/Fkbp4/Kat2a/Rad21/Ppfia1/Atad2/Nav3/Bnip3/Fhod3/Atrx/Kdm5a/Hdac6/Cep192/Trip13/Phf23/Ercc4/Prelid1/Nek2/Taok1	42
GO:0006470	GO:0006470	protein dephosphorylation	30/1188	238/23239	4.92438e-06	0.000232653	0.000196924	Ppp1r15b/Cdc25c/Ppp1r8/Ppm1g/Rprd1b/Ppp1r2/Pin1/Rock1/Ppp1r15a/Ppp1cc/Sppl3/Prkcd/Ppm1a/Cdc14b/Pten/Ppp2cb/Ptpn11/Ptbp1/Tiprl/Dusp14/Fbxw11/Pdp2/Gnai2/Rprd1a/Ppp1r12a/Jak2/Ppp2r5e/Ssu72/Ptpn1/Rock2	30
GO:0000469	GO:0000469	cleavage involved in rRNA processing	8/1188	21/23239	5.10115e-06	0.000238664	0.000202013	Rps21/Nhp2/Rpsa/Utp23/Bop1/Nol9/Rrs1/Nob1	8
GO:0051098	GO:0051098	regulation of binding	42/1188	392/23239	5.20521e-06	0.000241191	0.000204152	Krit1/Hipk1/Syap1/Cdk9/Ncbp1/Map1lc3b/Ppp1r2/Pin1/Rock1/Eif4g1/Trib3/Sppl3/Ep300/Gata1/Wapl/Traf2/Sirt1/Bambi/Ppp2cb/Mark3/Gnl3l/Hipk3/Dot1l/Kat2b/Hmbox1/Eif3c/Edf1/Csnk1a1/Btaf1/Med25/Ran/Eif4a3/Gsk3b/Rpl11/Jak2/Ercc4/Mark2/Eif2ak3/E2f1/Nek2/Usp33/Eif2b4	42
GO:1903312	GO:1903312	negative regulation of mRNA metabolic process	15/1188	76/23239	5.8577e-06	0.000268841	0.000227555	Cdk9/Syncrip/Pabpc1/Srsf6/Larp1/Hnrnpa0/Ptbp1/C1qbp/Tob1/Angel2/Zc3h14/Qk/Rnf20/Ybx1/E2f1	15
GO:0000819	GO:0000819	sister chromatid segregation	25/1188	181/23239	5.9624e-06	0.000271064	0.000229437	Mad2l1bp/Apc/Cul3/Tpr/Akap8/Cdc14b/Wapl/Dync1li1/Esco1/Khdc3/Ncapd2/Rad21/Pds5a/Atrx/Hira/Rrs1/Racgap1/Ran/Cep192/Stag2/Trip13/Phf23/Smc1b/Espl1/Nek2	25
GO:0016571	GO:0016571	histone methylation	21/1188	137/23239	6.36202e-06	0.000285727	0.000241848	Rlf/Mthfr/Kdm3a/Bend3/Kmt2c/Setd2/Prmt6/Fbl/Kdm4c/L3mbtl2/Sirt1/Pwp1/Ntmt1/Dot1l/Atrx/Ctcf/Suv39h1/Rnf20/Zfp335/Rif1/Ncoa6	21
GO:1904589	GO:1904589	regulation of protein import	16/1188	86/23239	6.45287e-06	0.000285727	0.000241848	Tpr/Ubr5/Cdk1/Prkcd/Ep300/Prkcq/Ipo5/Sirt1/Mapk14/Zpr1/Ei24/Hnrnpm/Pik3r1/Nf1/Jak2/Chp1	16
GO:0000478	GO:0000478	endonucleolytic cleavage involved in rRNA processing	6/1188	11/23239	6.52209e-06	0.000285727	0.000241848	Rps21/Rpsa/Utp23/Bop1/Nol9/Rrs1	6
GO:0000479	GO:0000479	endonucleolytic cleavage of tricistronic rRNA transcript (SSU-rRNA, 5.8S rRNA, LSU-rRNA)	6/1188	11/23239	6.52209e-06	0.000285727	0.000241848	Rps21/Rpsa/Utp23/Bop1/Nol9/Rrs1	6
GO:0022411	GO:0022411	cellular component disassembly	38/1188	343/23239	6.68132e-06	0.000288324	0.000244046	Tigar/Map1lc3b/Wipi2/Apc/Sh3bp1/Etf1/Plk3/Wdr45b/Stmn3/Cdk1/Setx/Nmnat1/Lamp2/Ulk1/Exoc8/Fundc1/Dedd2/Ddr2/Rb1cc1/Arid2/Fyco1/Map1lc3a/Nav3/Bnip3/Denr/Cttn/Rpl23/Apaf1/Wdr45/Gabarapl2/Hdac6/Smarcc1/Vcp/Atg13/Phf23/Atg9a/Kif5b/Taok1	38
GO:2001243	GO:2001243	negative regulation of intrinsic apoptotic signaling pathway	17/1188	96/23239	6.7204e-06	0.000288324	0.000244046	Bag5/Pttg1ip/G2e3/Noc2l/Gpx1/Cdkn2d/Sod2/Sirt1/Ddx3x/Hdac1/Snai1/Mcl1/Ivns1abp/Usp47/Tpt1/Ptpn1/Ddias	17
GO:0009895	GO:0009895	negative regulation of catabolic process	33/1188	279/23239	6.76087e-06	0.000288324	0.000244046	Bag5/Ctsa/Tigar/Syncrip/Eif4g2/Pin1/Eif4g1/Pabpc1/Nmnat1/Ubxn1/Wac/Larp1/Hnrnpa0/Cptp/Ptbp1/Mcl1/Usp36/Rps7/Rpl23/Tob1/Mtch2/Angel2/Tlk2/Azin1/Gabarapl2/Smarcc1/Snx3/Qk/Mycbp2/Rpl11/Phf23/Ybx1/E2f1	33
GO:2001021	GO:2001021	negative regulation of response to DNA damage stimulus	14/1188	69/23239	8.51286e-06	0.000359855	0.000304592	Pttg1ip/Ubr5/Cdkn2d/Rps3/Polq/Sirt1/Snai1/Chek2/Usp47/Tpt1/Smchd1/Ercc4/Rif1/Ddias	14
GO:0031056	GO:0031056	regulation of histone modification	22/1188	151/23239	8.95805e-06	0.000375381	0.000317734	Cdk9/Mthfr/Kdm3a/Ubr5/Noc2l/Akap8/Prmt6/Ep300/Kdm4c/L3mbtl2/Sirt1/Kat2b/Kat2a/Setd5/Atrx/Kdm5a/Ctcf/Suv39h1/Arid5a/Rnf20/Zfp335/Rif1	22
GO:0006479	GO:0006479	protein methylation	24/1188	174/23239	9.30938e-06	0.000383435	0.000324551	Rlf/Mthfr/Kdm3a/Bend3/Etf1/Kmt2c/Setd2/Prmt6/Fbl/Kdm4c/L3mbtl2/Sirt1/Pwp1/Ntmt1/Dot1l/Snrpb/Atrx/Eef1akmt1/Ctcf/Suv39h1/Rnf20/Zfp335/Rif1/Ncoa6	24
GO:0008213	GO:0008213	protein alkylation	24/1188	174/23239	9.30938e-06	0.000383435	0.000324551	Rlf/Mthfr/Kdm3a/Bend3/Etf1/Kmt2c/Setd2/Prmt6/Fbl/Kdm4c/L3mbtl2/Sirt1/Pwp1/Ntmt1/Dot1l/Snrpb/Atrx/Eef1akmt1/Ctcf/Suv39h1/Rnf20/Zfp335/Rif1/Ncoa6	24
GO:0031330	GO:0031330	negative regulation of cellular catabolic process	29/1188	234/23239	9.80264e-06	0.00040033	0.000338851	Bag5/Ctsa/Tigar/Syncrip/Eif4g2/Eif4g1/Pabpc1/Nmnat1/Ubxn1/Wac/Larp1/Hnrnpa0/Cptp/Ptbp1/Mcl1/Usp36/Rps7/Rpl23/Tob1/Mtch2/Angel2/Tlk2/Gabarapl2/Smarcc1/Qk/Rpl11/Phf23/Ybx1/E2f1	29
GO:0010948	GO:0010948	negative regulation of cell cycle process	28/1188	222/23239	9.95354e-06	0.000403077	0.000341176	Cdk9/Mad2l1bp/Apc/Tpr/Plk3/Cdk1/Cdkn2d/Cdc14b/Wapl/Jade1/Rfwd3/Pten/Dync1li1/Kat2b/Chek2/Khdc3/Kat2a/Rad21/Rpl23/Atrx/Nacc2/Usp47/Cep192/Rad17/Stag2/Trip13/Nek2/Taok1	28
GO:0016032	GO:0016032	viral process	32/1188	272/23239	1.03543e-05	0.000412373	0.000349045	Rab5a/Etf1/Ist1/P4hb/Pabpc1/Zfp639/Ep300/Ddb1/Larp1/Crebbp/Zc3hav1/Ddx3x/Hdac1/Rest/Rab1a/Ctsb/Ptbp1/Pde12/Eif3b/Rab43/Eea1/Eif3f/Denr/Hacd3/Ppia/Snf8/Snx3/Chd1/Vcp/Hcfc1/Pkn2/Rock2	32
GO:0140014	GO:0140014	mitotic nuclear division	32/1188	272/23239	1.03543e-05	0.000412373	0.000349045	Mad2l1bp/Apc/Ccna2/Rpl24/Cul3/Tpr/Akap8/Ccnjl/Tubgcp6/Cdc14b/Ccne1/Dync1li1/Chek2/Ube2c/Khdc3/Ncapd2/Rad21/Pds5a/Atrx/Hira/Rrs1/Racgap1/Ran/Cep192/Nde1/Ccnd3/Stag2/Mki67/Trip13/Phf23/Espl1/Nek2	32
GO:1901361	GO:1901361	organic cyclic compound catabolic process	48/1188	487/23239	1.11966e-05	0.000442265	0.000374347	Dhtkd1/Tigar/Syncrip/Ncbp1/Ago2/Smg5/Etf1/Nudt4/Pabpc1/Nmnat1/Cnot8/Upp1/Larp1/Pabpc4/Zc3hav1/Rbm8a2/Hnrnpa0/Ptbp1/Rbm8a/Ldha/Tbrg4/Pde12/Cnot1/Csde1/Pgam1/Tob1/Mtch2/Smg1/Casc3/Angel2/Ythdf2/Apaf1/Zpr1/Zc3h14/Drosha/Hnrnpm/Eif4a3/Qk/Dis3/Lsm2/Vcp/Fxr2/Rc3h1/Dna2/Ybx1/Hnrnpr/E2f1/Cnot10	48
GO:0042306	GO:0042306	regulation of protein import into nucleus	15/1188	81/23239	1.32164e-05	0.000517805	0.000438285	Tpr/Ubr5/Cdk1/Prkcd/Ep300/Prkcq/Ipo5/Sirt1/Mapk14/Zpr1/Ei24/Pik3r1/Nf1/Jak2/Chp1	15
GO:2001235	GO:2001235	positive regulation of apoptotic signaling pathway	24/1188	178/23239	1.37427e-05	0.00053408	0.000452061	Ctsc/Tnfrsf12a/Prkcd/Rps3/Dedd2/Traf2/Pten/Sirt1/Mcl1/Pak2/Serinc3/Bnip3/Rps7/Mtch2/Nacc2/Apaf1/Ei24/Traf7/Siva1/Gsk3b/Nf1/Rpl11/Jak2/Eif2ak3	24
GO:0072331	GO:0072331	signal transduction by p53 class mediator	20/1188	133/23239	1.40375e-05	0.000541175	0.000458067	Hipk1/Pttg1ip/Brca2/Jmy/Prmt6/Nop2/Ep300/Sirt1/Snai1/Chek2/Bop1/Rps7/Rpl23/Atrx/Mybbp1a/Rrs1/Cdip1/Sesn2/Rpl11/E2f1	20
GO:0009896	GO:0009896	positive regulation of catabolic process	41/1188	401/23239	2.05573e-05	0.000784055	0.000663648	Ctsc/Pttg1ip/Ago2/Arih2/Apc/Rock1/Plk3/Trib3/Prkcd/Pabpc1/Ulk1/Cnot8/Wac/Ddb1/Larp1/Pten/Sirt1/Zc3hav1/Oaz1/Smad7/Pip4k2c/Cnot1/Fyco1/Bnip3/Csnk1a1/Map3k7/Gga1/Tob1/Ythdf2/Sesn2/Snf8/Hdac6/Qk/Nub1/Vcp/Gsk3b/Rc3h1/Zfand2a/Hnrnpr/Egln2/Ptpn1	41
GO:0044403	GO:0044403	symbiont process	37/1188	347/23239	2.0663e-05	0.000784055	0.000663648	Rab5a/Etf1/Gpx1/Ist1/P4hb/Pabpc1/Scd1/Zfp639/Ulk1/Ep300/Ddb1/Larp1/Crebbp/Zc3hav1/Ddx3x/Hdac1/Rest/Rab1a/Ctsb/Ptbp1/Pde12/Eif3b/Rab43/Eea1/Eif3f/Denr/Hacd3/Ppia/Snf8/Tnip1/Snx3/Chd1/Vcp/Hcfc1/Pkn2/Tcp1/Rock2	37
GO:0098813	GO:0098813	nuclear chromosome segregation	30/1188	256/23239	2.08564e-05	0.00078521	0.000664626	Mad2l1bp/Brca2/Apc/Cul3/Tpr/Fancm/Akap8/Tex15/Cdc14b/Wapl/Ccne1/Dync1li1/Esco1/Khdc3/Ncapd2/Rad21/Pds5a/Atrx/Hira/Rrs1/Racgap1/Ran/Cep192/Stag2/Trip13/Phf23/Ercc4/Smc1b/Espl1/Nek2	30
GO:0000724	GO:0000724	double-strand break repair via homologous recombination	18/1188	115/23239	2.13842e-05	0.000787755	0.000666779	Yy1/Brca2/Smc6/Setd2/Tex15/Polq/Wrap53/Rfwd3/Terf2ip/Exd2/Zfyve26/Mms22l/Nabp1/Rbbp8/Rad51ap1/Smchd1/Ercc4/Rif1	18
GO:0000725	GO:0000725	recombinational repair	18/1188	115/23239	2.13842e-05	0.000787755	0.000666779	Yy1/Brca2/Smc6/Setd2/Tex15/Polq/Wrap53/Rfwd3/Terf2ip/Exd2/Zfyve26/Mms22l/Nabp1/Rbbp8/Rad51ap1/Smchd1/Ercc4/Rif1	18
GO:0000070	GO:0000070	mitotic sister chromatid segregation	21/1188	148/23239	2.14144e-05	0.000787755	0.000666779	Mad2l1bp/Apc/Cul3/Tpr/Akap8/Cdc14b/Dync1li1/Khdc3/Ncapd2/Rad21/Pds5a/Atrx/Hira/Rrs1/Racgap1/Ran/Cep192/Trip13/Phf23/Espl1/Nek2	21
GO:0006607	GO:0006607	NLS-bearing protein import into nucleus	6/1188	13/23239	2.21685e-05	0.000809319	0.000685032	Kpna1/Vhl/Ipo5/Ranbp2/Kpna6/Ipo4	6
GO:0018209	GO:0018209	peptidyl-serine modification	35/1188	322/23239	2.28578e-05	0.000823999	0.000697458	Ppp1r15a/Cab39/Eif4g1/Cdk1/Prkcd/Parp2/Wnk1/Ulk1/Gpd1l/Prkcq/Mark3/Terf2ip/Hipk3/Pwp1/Smad7/Mapk14/Ntmt1/Chek2/Mapkapk5/Pak2/Csnk1a1/Mknk2/Smg1/Sbk1/Tlk2/Hdac6/Raf1/Chuk/Gsk3b/Map2k2/Mark2/Eif2ak3/Pkn2/Pik3ca/Rock2	35
GO:0000956	GO:0000956	nuclear-transcribed mRNA catabolic process	17/1188	105/23239	2.29126e-05	0.000823999	0.000697458	Ncbp1/Ago2/Smg5/Etf1/Pabpc1/Cnot8/Rbm8a2/Ptbp1/Rbm8a/Pde12/Cnot1/Csde1/Tob1/Smg1/Casc3/Eif4a3/Rc3h1	17
GO:0046824	GO:0046824	positive regulation of nucleocytoplasmic transport	14/1188	75/23239	2.3188e-05	0.000827725	0.000700611	Tpr/Ubr5/Cdk1/Prkcd/Ep300/Prkcq/Ppm1a/Ipo5/Cpsf6/Mapk14/Zpr1/Pik3r1/Gsk3b/Jak2	14
GO:1900182	GO:1900182	positive regulation of protein localization to nucleus	15/1188	85/23239	2.41013e-05	0.000854003	0.000722854	Tpr/Ubr5/Cdk1/Prkcd/Ep300/Prkcq/Ipo5/Mcrs1/Mapk14/Zpr1/Sesn2/Hnrnpm/Pik3r1/Jak2/Eif2ak3	15
GO:0043484	GO:0043484	regulation of RNA splicing	20/1188	139/23239	2.71606e-05	0.000955378	0.00080866	Rbm5/Ncbp1/Srsf1/Rps26/Rps13/Setx/Srsf6/Rest/Rbm8a2/Ptbp1/Rbm8a/C1qbp/Tra2a/Zpr1/Hnrnpf/Eif4a3/Pik3r1/Celf1/Rbm15/Cdk12	20
GO:0042176	GO:0042176	regulation of protein catabolic process	38/1188	366/23239	2.90928e-05	0.00101593	0.000859913	Bag5/Ctsc/Ctsa/Odc1/Pttg1ip/Vhl/Arih2/Apc/Pin1/Plk3/Gpx1/Trib3/Ubxn1/Wac/Ddb1/Pten/Oaz1/Smad7/Chek2/Csnk1a1/Rps7/Rpl23/Gga1/Tlk2/Snf8/Azin1/Gabarapl2/Smarcc1/Snx3/Nub1/Vcp/Mycbp2/Xpo1/Gsk3b/Rpl11/Zfand2a/Egln2/Dda1	38
GO:0006446	GO:0006446	regulation of translational initiation	12/1188	58/23239	3.02324e-05	0.00104813	0.000887169	Ppp1r15b/Ncbp1/Ago2/Eif4g2/Tpr/Ppp1r15a/Eif4g1/Ddx3x/Eif3b/Ythdf2/Eif5/Eif2ak3	12
GO:0032259	GO:0032259	methylation	36/1188	340/23239	3.08728e-05	0.00106008	0.000897285	Rlf/Mthfr/Kdm3a/Pemt/Mettl2/Mta2/Bend3/Etf1/Kmt2c/Setd2/Gtpbp3/Prmt6/Fbl/Nop2/Kdm4c/L3mbtl2/Sirt1/Pwp1/Ntmt1/Dot1l/Snrpb/Bhmt2/Atrx/Tfb2m/Eef1akmt1/Emg1/Ctcf/Suv39h1/Gsk3b/Rnf20/Rbm15/Zfp335/Rif1/Pik3ca/Trmt10c/Ncoa6	36
GO:0048285	GO:0048285	organelle fission	45/1188	464/23239	3.10171e-05	0.00106008	0.000897285	Btbd18/Psmc3ip/Mad2l1bp/Brca2/Apc/Ccna2/Rpl24/Cul3/Tpr/Fancm/Akap8/Tex15/Ccnjl/Tubgcp6/Cdc14b/Wapl/Ccne1/Dync1li1/Chek2/Ube2c/Khdc3/Ncapd2/Acox1/Sycp2/Rad21/Pds5a/Bnip3/Atrx/Mtch2/Hira/Rrs1/Racgap1/Ran/Ddhd2/Cep192/Nde1/Ccnd3/Stag2/Mki67/Trip13/Phf23/Ercc4/Ddhd1/Espl1/Nek2	45
GO:0018105	GO:0018105	peptidyl-serine phosphorylation	33/1188	301/23239	3.25819e-05	0.00110572	0.000935914	Ppp1r15a/Cab39/Eif4g1/Cdk1/Prkcd/Wnk1/Ulk1/Gpd1l/Prkcq/Mark3/Terf2ip/Hipk3/Pwp1/Smad7/Mapk14/Chek2/Mapkapk5/Pak2/Csnk1a1/Mknk2/Smg1/Sbk1/Tlk2/Hdac6/Raf1/Chuk/Gsk3b/Map2k2/Mark2/Eif2ak3/Pkn2/Pik3ca/Rock2	33
GO:0010256	GO:0010256	endomembrane system organization	37/1188	356/23239	3.60424e-05	0.00121151	0.00102546	Bag5/Tmed5/Tor1aip2/Aqp11/Tmem170/Gorasp1/Pi4k2a/Rab5a/Tor1b/Plk3/Pi4k2b/Cdk1/Prkcd/Rbsn/Exoc8/Rtn4/Als2/Lemd3/Pten/Micall1/Arfgef1/Rab1a/Cdan1/Ptbp1/Usp50/Tor1aip1/Rab43/Sec16a/Csnk1a1/Tmed6/Snx3/Agfg1/Ap3d1/Gcc2/Map2k2/Eif2ak3/Arfgef2	37
GO:1904591	GO:1904591	positive regulation of protein import	12/1188	59/23239	3.62019e-05	0.00121151	0.00102546	Tpr/Ubr5/Cdk1/Prkcd/Ep300/Prkcq/Ipo5/Mapk14/Zpr1/Hnrnpm/Pik3r1/Jak2	12
GO:0031396	GO:0031396	regulation of protein ubiquitination	24/1188	189/23239	3.74186e-05	0.00123376	0.00104429	Bag5/Cdk9/Pttg1ip/Rps2/Pin1/Cul3/Ubr5/Trib3/Rps3/Cdc14b/Ubxn1/Pten/Gnl3l/Smad7/Zyg11b/Rps7/Rpl23/Ube2l3/Ivns1abp/Fem1b/Rpl11/Rnf20/Phf23/Chp1	24
GO:0006282	GO:0006282	regulation of DNA repair	17/1188	109/23239	3.76349e-05	0.00123376	0.00104429	Tigar/Cdk9/Ubr5/Setd2/Tex15/Rps3/Polq/Wrap53/Sirt1/Terf2ip/Parg/Suv39h1/Rad51ap1/Usp1/Smchd1/Dek/Rif1	17
GO:0032092	GO:0032092	positive regulation of protein binding	17/1188	109/23239	3.76349e-05	0.00123376	0.00104429	Krit1/Syap1/Map1lc3b/Pin1/Trib3/Sppl3/Ep300/Traf2/Bambi/Ppp2cb/Mark3/Gnl3l/Ran/Gsk3b/Rpl11/Eif2ak3/Usp33	17
GO:1901990	GO:1901990	regulation of mitotic cell cycle phase transition	29/1188	254/23239	4.60253e-05	0.00149862	0.00126848	Cdc25c/Mad2l1bp/Apc/Cul3/Tpr/Plk3/Eif4g1/Cdk1/Prkcq/Cdc14b/Jade1/Rfwd3/Ddb1/Pten/Crebbp/Dync1li1/Ddx3x/Ube2c/Khdc3/Rad21/Nacc2/Dbf4/Usp47/Cep192/Rad17/Ccnd3/Trip13/E2f1/Taok1	29
GO:0045727	GO:0045727	positive regulation of translation	17/1188	111/23239	4.77465e-05	0.00154423	0.00130708	Trub2/Poldip3/Eif4g2/Serp1/Rps3a1/Rps9/Ep300/Ddx3x/Ptbp1/Otud6b/Eif3c/C1qbp/Ythdf2/Eif4a3/Usp16/Fxr2/Trmt10c	17
GO:0006457	GO:0006457	protein folding	20/1188	145/23239	5.03423e-05	0.00161733	0.00136896	Bag5/Prdx4/Ppil1/Tor1b/Emc4/Nktr/P4hb/Tor2a/Tbcc/Clpx/Mkks/Ero1l/Ranbp2/Fkbp4/Ube4b/Bag1/Ppia/Dnajb14/Nudcd2/Tcp1	20
GO:0071375	GO:0071375	cellular response to peptide hormone stimulus	27/1188	230/23239	5.13434e-05	0.00163857	0.00138693	H2afz/Syap1/Socs3/Apc/Rangap1/Rock1/Trib3/Prkcd/Adipor1/Prkcq/Pten/Sirt1/Ptpn11/Kat2b/Zfp106/Myo1c/Cpeb2/Gnai2/Smarcc1/Pik3r1/Dennd4c/Ccnd3/Gsk3b/Jak2/Ybx1/Ptpn1/Rock2	27
GO:0009123	GO:0009123	nucleoside monophosphate metabolic process	30/1188	269/23239	5.32615e-05	0.00167815	0.00142043	Dhtkd1/Shmt1/Tigar/Adsl/Prps1/Impdh2/Uck2/Impdh1/Bend3/Cdk1/Nudt4/Nmnat1/Clpx/Paics/Uqcrfs1/Uqcrc1/Ldha/Gart/Pde12/Uqcc3/Atp5j/Pgam1/Ppat/Parg/Mtch2/Aprt/Atp5g1/Vcp/Tefm/Atp5f1	30
GO:0032869	GO:0032869	cellular response to insulin stimulus	23/1188	181/23239	5.328e-05	0.00167815	0.00142043	H2afz/Syap1/Socs3/Apc/Trib3/Prkcd/Adipor1/Prkcq/Pten/Sirt1/Ptpn11/Kat2b/Zfp106/Myo1c/Cpeb2/Gnai2/Smarcc1/Pik3r1/Dennd4c/Ccnd3/Gsk3b/Ybx1/Ptpn1	23
GO:0031331	GO:0031331	positive regulation of cellular catabolic process	35/1188	336/23239	5.53199e-05	0.0017097	0.00144714	Ctsc/Pttg1ip/Ago2/Arih2/Rock1/Plk3/Trib3/Prkcd/Pabpc1/Ulk1/Cnot8/Wac/Larp1/Pten/Sirt1/Zc3hav1/Smad7/Pip4k2c/Cnot1/Fyco1/Bnip3/Csnk1a1/Map3k7/Tob1/Ythdf2/Sesn2/Hdac6/Qk/Nub1/Vcp/Gsk3b/Rc3h1/Zfand2a/Hnrnpr/Ptpn1	35
GO:0043984	GO:0043984	histone H4-K16 acetylation	7/1188	21/23239	5.53461e-05	0.0017097	0.00144714	Kansl1/Mcrs1/Sirt1/Kansl3/Hcfc1/Kansl2/Msl2	7
GO:0044346	GO:0044346	fibroblast apoptotic process	7/1188	21/23239	5.53461e-05	0.0017097	0.00144714	Cul3/Ruvbl1/Ier3ip1/Sirt1/Cfdp1/Pik3ca/Ddias	7
GO:0043981	GO:0043981	histone H4-K5 acetylation	6/1188	15/23239	5.91799e-05	0.00180499	0.0015278	Kansl1/Jade1/Mcrs1/Kansl3/Hcfc1/Kansl2	6
GO:0043982	GO:0043982	histone H4-K8 acetylation	6/1188	15/23239	5.91799e-05	0.00180499	0.0015278	Kansl1/Jade1/Mcrs1/Kansl3/Hcfc1/Kansl2	6
GO:0009161	GO:0009161	ribonucleoside monophosphate metabolic process	29/1188	258/23239	6.11478e-05	0.00185328	0.00156867	Dhtkd1/Tigar/Adsl/Prps1/Impdh2/Uck2/Impdh1/Bend3/Cdk1/Nudt4/Nmnat1/Clpx/Paics/Uqcrfs1/Uqcrc1/Ldha/Gart/Pde12/Uqcc3/Atp5j/Pgam1/Ppat/Parg/Mtch2/Aprt/Atp5g1/Vcp/Tefm/Atp5f1	29
GO:0045930	GO:0045930	negative regulation of mitotic cell cycle	27/1188	233/23239	6.42738e-05	0.00193585	0.00163856	Rps6/Mad2l1bp/Apc/Rpl24/Tpr/Plk3/Cdk1/Cdc14b/Jade1/Rfwd3/Pten/Dync1li1/Chek2/Khdc3/Dclre1b/Rad21/Atrx/Angel2/Nacc2/Usp47/Nabp1/Cep192/Rad17/Trip13/Taok1/Ints3/Ddias	27
GO:0071103	GO:0071103	DNA conformation change	25/1188	208/23239	6.52847e-05	0.00195408	0.00165399	Set/Mta2/Brd2/Tpr/Noc2l/Psme4/Cdk1/Akap8/Wapl/Cdan1/Ncapd2/Atrx/Ncapg2/Hira/Ubn1/Nap1l1/Cabin1/Mcm6/Smarcc1/Ctcf/Suv39h1/Smchd1/Kat6a/Phf23/Ipo4	25
GO:0006338	GO:0006338	chromatin remodeling	18/1188	125/23239	6.666e-05	0.00198293	0.00167841	Dr1/Baz1a/Mta2/Tpr/Ptma/Ruvbl1/Ttf1/Psme4/Hmgb3/Kat2b/Srcap/Atrx/Chd7/Smarcc1/Chd1/Cecr2/Smchd1/Baz1b	18
GO:0050657	GO:0050657	nucleic acid transport	20/1188	148/23239	6.75239e-05	0.00198295	0.00167843	Tomm20/Ncbp1/Poldip3/Srsf1/Tpr/Setd2/Ahctf1/Rps15/Xpot/Rpsa/Pa2g4/Cpsf6/Ranbp2/Casc3/Myo1c/Rrs1/Ran/Qk/Xpo1/Snupn	20
GO:0050658	GO:0050658	RNA transport	20/1188	148/23239	6.75239e-05	0.00198295	0.00167843	Tomm20/Ncbp1/Poldip3/Srsf1/Tpr/Setd2/Ahctf1/Rps15/Xpot/Rpsa/Pa2g4/Cpsf6/Ranbp2/Casc3/Myo1c/Rrs1/Ran/Qk/Xpo1/Snupn	20
GO:1903829	GO:1903829	positive regulation of cellular protein localization	32/1188	299/23239	6.7895e-05	0.00198295	0.00167843	Stac2/Apc/Tpr/Ubr5/Plk3/Cdk1/Prkcd/Gpd1l/Ep300/Prkcq/Rtn4/Ppm1a/Wrap53/Ipo5/Mcrs1/Oaz1/Gnl3l/Mapk14/Sec16a/Arf6/Zpr1/Myo1c/Sesn2/Hnrnpm/Pik3r1/Gsk3b/Jak2/Eif2ak3/Kif5b/Tcp1/Gnl3/Rock2	32
GO:0051168	GO:0051168	nuclear export	19/1188	137/23239	7.13358e-05	0.00207089	0.00175286	Ncbp1/Poldip3/Tpr/Rangap1/Setd2/Ppm1a/Rps15/Xpot/Rpsa/Pa2g4/Ptpn11/Cpsf6/Xpo6/Lsg1/Rrs1/Ran/Xpo1/Gsk3b/Chp1	19
GO:1902373	GO:1902373	negative regulation of mRNA catabolic process	10/1188	45/23239	7.27212e-05	0.00209846	0.0017762	Syncrip/Pabpc1/Larp1/Hnrnpa0/Ptbp1/Tob1/Angel2/Qk/Ybx1/E2f1	10
GO:0042307	GO:0042307	positive regulation of protein import into nucleus	11/1188	54/23239	7.49262e-05	0.00214922	0.00181917	Tpr/Ubr5/Cdk1/Prkcd/Ep300/Prkcq/Ipo5/Mapk14/Zpr1/Pik3r1/Jak2	11
GO:0000184	GO:0000184	nuclear-transcribed mRNA catabolic process, nonsense-mediated decay	9/1188	37/23239	7.85068e-05	0.00222544	0.00188368	Ncbp1/Smg5/Etf1/Pabpc1/Rbm8a2/Rbm8a/Smg1/Casc3/Eif4a3	9
GO:1902229	GO:1902229	regulation of intrinsic apoptotic signaling pathway in response to DNA damage	9/1188	37/23239	7.85068e-05	0.00222544	0.00188368	Cdkn2d/Rps3/Sirt1/Snai1/Mtch2/Nacc2/Usp47/Tpt1/Ddias	9
GO:2001234	GO:2001234	negative regulation of apoptotic signaling pathway	26/1188	224/23239	8.47374e-05	0.00238801	0.00202128	Tnfrsf22/Bag5/Zc3hc1/Pttg1ip/G2e3/Noc2l/Gpx1/Cdkn2d/Gata1/Sod2/Sirt1/Ddx3x/Hdac1/Snai1/Rb1cc1/Mcl1/Cttn/Map3k7/Ivns1abp/Usp47/Gnai2/Raf1/Tpt1/Prelid1/Ptpn1/Ddias	26
GO:1901983	GO:1901983	regulation of protein acetylation	13/1188	74/23239	8.69626e-05	0.00243647	0.0020623	Noc2l/Ep300/L3mbtl2/Sirt1/Terf2ip/Hdac1/Kat2b/Kat2a/Setd5/Ctcf/Arid5a/Gsk3b/Taok1	13
GO:0061014	GO:0061014	positive regulation of mRNA catabolic process	10/1188	46/23239	8.86998e-05	0.00246725	0.00208836	Ago2/Pabpc1/Cnot8/Zc3hav1/Cnot1/Tob1/Ythdf2/Qk/Rc3h1/Hnrnpr	10
GO:0032868	GO:0032868	response to insulin	25/1188	212/23239	8.90852e-05	0.00246725	0.00208836	H2afz/Syap1/Socs3/Apc/Trib3/Prkcd/Adipor1/Prkcq/Cited1/Pten/Sirt1/Ptpn11/Kat2b/Zfp106/Myo1c/Sesn2/Cpeb2/Gnai2/Smarcc1/Pik3r1/Dennd4c/Ccnd3/Gsk3b/Ybx1/Ptpn1	25
GO:0051236	GO:0051236	establishment of RNA localization	20/1188	151/23239	8.97257e-05	0.00247079	0.00209135	Tomm20/Ncbp1/Poldip3/Srsf1/Tpr/Setd2/Ahctf1/Rps15/Xpot/Rpsa/Pa2g4/Cpsf6/Ranbp2/Casc3/Myo1c/Rrs1/Ran/Qk/Xpo1/Snupn	20
GO:0035304	GO:0035304	regulation of protein dephosphorylation	14/1188	85/23239	9.7637e-05	0.00267337	0.00226282	Ppp1r15b/Ppp1r8/Ppp1r2/Pin1/Rock1/Ppp1r15a/Sppl3/Prkcd/Ptbp1/Tiprl/Gnai2/Ppp1r12a/Jak2/Rock2	14
GO:0007005	GO:0007005	mitochondrion organization	42/1188	445/23239	0.000103609	0.00282086	0.00238766	Tomm20/Tigar/Rnf7/Map1lc3b/Wipi2/Gpx1/Wdr45b/Eif4g1/Tomm5/Ulk1/Fundc1/Tomm22/Sod2/Mef2a/Ppp2cb/Timm8a1/Rb1cc1/Timm17b/Uqcc3/Mcl1/Kat2a/Map1lc3a/Bnip3/Cttn/Mtch2/Wdr45/Tomm40/Sesn2/Gabarapl2/Hdac6/Ddhd2/Siva1/Slc25a36/Chchd2/Trak2/Atg13/Gsk3b/Rhot1/Dna2/Ddhd1/Atg9a/Prelid1	42
GO:0000280	GO:0000280	nuclear division	40/1188	417/23239	0.000106153	0.00287107	0.00243016	Btbd18/Psmc3ip/Mad2l1bp/Brca2/Apc/Ccna2/Rpl24/Cul3/Tpr/Fancm/Akap8/Tex15/Ccnjl/Tubgcp6/Cdc14b/Wapl/Ccne1/Dync1li1/Chek2/Ube2c/Khdc3/Ncapd2/Sycp2/Rad21/Pds5a/Atrx/Hira/Rrs1/Racgap1/Ran/Cep192/Nde1/Ccnd3/Stag2/Mki67/Trip13/Phf23/Ercc4/Espl1/Nek2	40
GO:0045943	GO:0045943	positive regulation of transcription by RNA polymerase I	7/1188	23/23239	0.000106645	0.00287107	0.00243016	Dhx33/Nol11/Ubtf/Ppp1r15a/Pwp1/Atf4/Eif2ak3	7
GO:0033046	GO:0033046	negative regulation of sister chromatid segregation	10/1188	47/23239	0.000107556	0.00287952	0.00243731	Mad2l1bp/Apc/Tpr/Wapl/Dync1li1/Khdc3/Rad21/Atrx/Cep192/Trip13	10
GO:0097191	GO:0097191	extrinsic apoptotic signaling pathway	26/1188	228/23239	0.000113549	0.00301532	0.00255226	Tnfrsf22/Hipk1/Zc3hc1/Sgpp1/Tnfrsf12a/Gpx1/Casp8ap2/Parp2/Gata1/Dedd2/Traf2/Pten/Ddx3x/Rb1cc1/Mcl1/Pak2/Cttn/Mknk2/Raf1/Pik3r1/Siva1/Fem1b/Gsk3b/Nf1/Jak2/Rock2	26
GO:0009167	GO:0009167	purine ribonucleoside monophosphate metabolic process	28/1188	254/23239	0.00011388	0.00301532	0.00255226	Dhtkd1/Tigar/Adsl/Prps1/Impdh2/Impdh1/Bend3/Cdk1/Nudt4/Nmnat1/Clpx/Paics/Uqcrfs1/Uqcrc1/Ldha/Gart/Pde12/Uqcc3/Atp5j/Pgam1/Ppat/Parg/Mtch2/Aprt/Atp5g1/Vcp/Tefm/Atp5f1	28
GO:0006275	GO:0006275	regulation of DNA replication	16/1188	108/23239	0.000118292	0.00311503	0.00263666	Rbbp6/Brca2/Ccna2/Ttf1/Cdk1/Wapl/Cdan1/Usp37/Chek2/Esco1/Pds5a/Atrx/Dbf4/Rad17/Stag2/Dna2	16
GO:0009126	GO:0009126	purine nucleoside monophosphate metabolic process	28/1188	255/23239	0.000121828	0.00319069	0.0027007	Dhtkd1/Tigar/Adsl/Prps1/Impdh2/Impdh1/Bend3/Cdk1/Nudt4/Nmnat1/Clpx/Paics/Uqcrfs1/Uqcrc1/Ldha/Gart/Pde12/Uqcc3/Atp5j/Pgam1/Ppat/Parg/Mtch2/Aprt/Atp5g1/Vcp/Tefm/Atp5f1	28
GO:0001841	GO:0001841	neural tube formation	18/1188	131/23239	0.000123537	0.00320066	0.00270914	Folr1/Mthfr/Setd2/Lias/Brpf1/Ovol2/Rarg/Kat2a/Rps7/Map3k7/Apaf1/Luzp1/Cecr2/Nckap1/Ipmk/Tulp3/Hectd1/Rock2	18
GO:0007093	GO:0007093	mitotic cell cycle checkpoint	18/1188	131/23239	0.000123537	0.00320066	0.00270914	Rps6/Mad2l1bp/Apc/Rpl24/Tpr/Plk3/Cdk1/Rfwd3/Dync1li1/Chek2/Khdc3/Dclre1b/Nabp1/Cep192/Rad17/Trip13/Taok1/Ints3	18
GO:0016311	GO:0016311	dephosphorylation	36/1188	364/23239	0.000125973	0.00324633	0.00274779	Ppp1r15b/Cdc25c/Ppp1r8/Ppm1g/Rprd1b/Ppp1r2/Smg5/Pin1/Rock1/Ppp1r15a/Ppp1cc/Sppl3/Prkcd/Wnk1/Sfi1/Ppm1a/Cdc14b/Csrnp3/Pten/Ppp2cb/Ptpn11/Ptbp1/Tiprl/Dusp14/Fbxw11/Pdp2/Gnai2/Rprd1a/Cep192/Ppp1r12a/Jak2/Ppp2r5e/Chp1/Ssu72/Ptpn1/Rock2	36
GO:0010833	GO:0010833	telomere maintenance via telomere lengthening	13/1188	77/23239	0.000132481	0.00339589	0.00287438	Smg5/Nhp2/Prkcq/Wrap53/Mcrs1/Terf2ip/Gnl3l/Hmbox1/Dclre1b/Mapkapk5/Ercc4/Nek2/Tcp1	13
GO:0071428	GO:0071428	rRNA-containing ribonucleoprotein complex export from nucleus	6/1188	17/23239	0.000133961	0.00341566	0.00289111	Rps15/Rpsa/Pa2g4/Rrs1/Ran/Xpo1	6
GO:0006333	GO:0006333	chromatin assembly or disassembly	19/1188	144/23239	0.000140224	0.00355653	0.00301035	Set/Brd2/Tpr/Noc2l/Cdan1/Arid2/Atrx/Hira/Ubn1/Nap1l1/Tlk2/Cabin1/Smarcc1/Ctcf/Chd1/Smchd1/Kat6a/Baz1b/Ipo4	19
GO:1901987	GO:1901987	regulation of cell cycle phase transition	30/1188	284/23239	0.000142689	0.0036001	0.00304723	Cdc25c/Mad2l1bp/Apc/Cul3/Tpr/Plk3/Eif4g1/Cdk1/Cdkn2d/Prkcq/Cdc14b/Jade1/Rfwd3/Ddb1/Pten/Crebbp/Dync1li1/Ddx3x/Ube2c/Khdc3/Rad21/Nacc2/Dbf4/Usp47/Cep192/Rad17/Ccnd3/Trip13/E2f1/Taok1	30
GO:0040029	GO:0040029	regulation of gene expression, epigenetic	29/1188	271/23239	0.000146116	0.00366737	0.00310417	Ppp1r8/Ncbp1/Clp1/Ubtf/Ago2/Pcgf5/Bend3/Gpx1/Eif4g1/Ep300/Sirt1/Ajuba/Hdac1/Atad2b/Dot1l/Cnot1/Atad2/Hira/Drosha/Hdac6/Ctcf/Suv39h1/Gsk3b/Smchd1/Map2k2/Rbm15/Zfp335/Rif1/Eif1	29
GO:2000058	GO:2000058	regulation of ubiquitin-dependent protein catabolic process	19/1188	145/23239	0.000153778	0.00383966	0.00325001	Bag5/Arih2/Plk3/Trib3/Ubxn1/Wac/Pten/Smad7/Csnk1a1/Rps7/Rpl23/Tlk2/Smarcc1/Nub1/Vcp/Gsk3b/Rpl11/Zfand2a/Dda1	19
GO:0006360	GO:0006360	transcription by RNA polymerase I	10/1188	49/23239	0.000155556	0.00386405	0.00327065	Dhx33/Nol11/Ubtf/Ppp1r15a/Ttf1/Znrd1/Pwp1/Atf4/Polr1e/Eif2ak3	10
GO:0044419	GO:0044419	interspecies interaction between organisms	39/1188	411/23239	0.000161289	0.00398591	0.00337379	Rps19/Rab5a/Etf1/Gpx1/Ist1/P4hb/Pabpc1/Scd1/Zfp639/Ulk1/Ep300/Ddb1/Larp1/Crebbp/Zc3hav1/Ddx3x/Hdac1/Rest/Rab1a/Ctsb/Ptbp1/Pde12/Eif3b/Rab43/Eea1/Eif3f/Denr/Hacd3/Ppia/Rpl30/Snf8/Tnip1/Snx3/Chd1/Vcp/Hcfc1/Pkn2/Tcp1/Rock2	39
GO:1901605	GO:1901605	alpha-amino acid metabolic process	23/1188	195/23239	0.00016704	0.00410696	0.00347626	Gcsh/Psat1/Shmt1/Glul/Prdx4/Mthfr/Odc1/Gldc/Pemt/Apc/P4hb/Nmnat1/Adi1/Ero1l/Gls2/Ivd/Gart/Bhmt2/Ppat/Azin1/Gpt2/Egln2/Gls	23
GO:0006611	GO:0006611	protein export from nucleus	17/1188	123/23239	0.000175428	0.00429132	0.0036323	Ncbp1/Poldip3/Tpr/Rangap1/Setd2/Ppm1a/Rps15/Xpot/Rpsa/Pa2g4/Ptpn11/Xpo6/Rrs1/Ran/Xpo1/Gsk3b/Chp1	17
GO:0000045	GO:0000045	autophagosome assembly	14/1188	90/23239	0.00018318	0.00445831	0.00377365	Map1lc3b/Wipi2/Wdr45b/Ulk1/Rab1a/Pip4k2c/Rb1cc1/Map1lc3a/Wdr45/Gabarapl2/Atg13/Phf23/Atg9a/Tmem41b	14
GO:0051985	GO:0051985	negative regulation of chromosome segregation	10/1188	50/23239	0.000185629	0.0044952	0.00380487	Mad2l1bp/Apc/Tpr/Wapl/Dync1li1/Khdc3/Rad21/Atrx/Cep192/Trip13	10
GO:0060249	GO:0060249	anatomical structure homeostasis	37/1188	386/23239	0.000192133	0.00462946	0.00391851	Vhl/Brca2/Smc6/Smg5/Apc/Tex15/Lamp2/Nhp2/Prkcq/Gata1/Def8/Wrap53/Mcrs1/Ccne1/Mkks/Terf2ip/Gnl3l/Ptpn11/Hmbox1/Dclre1b/Mapkapk5/Tfrc/Atrx/Smg1/Prdx5/Gcnt2/Wwtr1/Nf1/Ercc4/Dna2/Adgrv1/Wdr36/Nek2/Rif1/Taok1/Tcp1/Gnl3	37
GO:0035966	GO:0035966	response to topologically incorrect protein	17/1188	124/23239	0.000193787	0.00464607	0.00393258	Dnajb9/Fbxo6/Serp1/Cul3/Ppp1r15a/Tbl2/Ep300/Ube2j2/Ero1l/Tmem129/Atf4/Hdac6/Pik3r1/Vcp/Ficd/Eif2ak3/Ptpn1	17
GO:0009411	GO:0009411	response to UV	18/1188	136/23239	0.000199847	0.00476763	0.00403547	Yy1/Brca2/Noc2l/Gpx1/Casp3/Cdkn2d/Ep300/Ddb1/Sirt1/Crebbp/Sdf4/Ube4b/Ei24/Usp47/Pik3r1/Usp1/Ercc4/Ddias	18
GO:1905214	GO:1905214	regulation of RNA binding	5/1188	12/23239	0.000202742	0.00479498	0.00405862	Cdk9/Ncbp1/Eif4g1/Eif3c/Eif4a3	5
GO:0019693	GO:0019693	ribose phosphate metabolic process	40/1188	430/23239	0.000202983	0.00479498	0.00405862	Dhtkd1/Rpia/Tigar/Pank3/Adsl/Prps1/Impdh2/Uck2/Impdh1/Bend3/Prps1l3/Cdk1/Nudt4/Nmnat1/Clpx/Paics/Uqcrfs1/Uqcrc1/Ldha/Gart/Pde12/Mpc2/Uqcc3/Nme2/Crot/Atp5j/Pgam1/Ppat/Parg/Ppcs/Pgd/Mtch2/Aprt/Atp5g1/Gpat4/Ran/Mpc1/Vcp/Tefm/Atp5f1	40
GO:0050821	GO:0050821	protein stabilization	20/1188	161/23239	0.000217391	0.00511028	0.00432549	Bag5/Pin1/Lamp2/Ep300/Rtn4/Pten/Smad7/Chek2/Tesc/Usp36/Rps7/Rpl23/Pik3r1/Hcfc1/Rpl11/Nckap1/Chp1/Ipo9/Tcp1/Usp33	20
GO:0032204	GO:0032204	regulation of telomere maintenance	13/1188	81/23239	0.000224044	0.00524111	0.00443623	Smg5/Prkcq/Mcrs1/Terf2ip/Gnl3l/Hmbox1/Mapkapk5/Atrx/Smg1/Ercc4/Nek2/Tcp1/Gnl3	13
GO:1903322	GO:1903322	positive regulation of protein modification by small protein conjugation or removal	17/1188	126/23239	0.000235583	0.00546546	0.00462613	Cdk9/Pttg1ip/Rps2/Pias3/Pin1/Cul3/Trib3/Cdc14b/Pten/Smad7/Ube2l3/Traf7/Tnip1/Vcp/Rnf20/Phf23/Gnl3	17
GO:0043966	GO:0043966	histone H3 acetylation	11/1188	61/23239	0.000235903	0.00546546	0.00462613	Dr1/Brca2/Brpf1/Ep300/Jade1/Sirt1/Kat2b/Taf5l/Brd1/Kat2a/Kat6a	11
GO:1901653	GO:1901653	cellular response to peptide	28/1188	266/23239	0.000248159	0.00569974	0.00482443	H2afz/Syap1/Socs3/Apc/Rangap1/Rock1/Trib3/Prkcd/Adipor1/Prkcq/Pten/Sirt1/Ptpn11/Kat2b/Zfp106/Rpl23/Myo1c/Cpeb2/Gnai2/Smarcc1/Pik3r1/Dennd4c/Ccnd3/Gsk3b/Jak2/Ybx1/Ptpn1/Rock2	28
GO:2001252	GO:2001252	positive regulation of chromosome organization	21/1188	175/23239	0.00024838	0.00569974	0.00482443	Cdk9/Cul3/Tpr/Akap8/Ep300/Prkcq/L3mbtl2/Sirt1/Kat2b/Hmbox1/Mapkapk5/Kat2a/Rad21/Atrx/Suv39h1/Arid5a/Rnf20/Nek2/Rif1/Tcp1/Gnl3	21
GO:0000470	GO:0000470	maturation of LSU-rRNA	7/1188	26/23239	0.000250082	0.00571159	0.00483446	Znhit3/Nhp2/Bop1/Rpl35/Znhit6/Nol9/Rpl10a	7
GO:0045070	GO:0045070	positive regulation of viral genome replication	8/1188	34/23239	0.000251382	0.00571419	0.00483666	Pabpc1/Ddb1/Larp1/Ddx3x/Pde12/Hacd3/Ppia/Pkn2	8
GO:0035303	GO:0035303	regulation of dephosphorylation	20/1188	163/23239	0.000256698	0.00580764	0.00491576	Ppp1r15b/Ppp1r8/Ppp1r2/Smg5/Pin1/Rock1/Ppp1r15a/Sppl3/Prkcd/Wnk1/Sfi1/Csrnp3/Ptbp1/Tiprl/Gnai2/Cep192/Ppp1r12a/Jak2/Chp1/Rock2	20
GO:0051983	GO:0051983	regulation of chromosome segregation	15/1188	104/23239	0.000258268	0.00581587	0.00492272	Mad2l1bp/Smc6/Apc/Cul3/Tpr/Wapl/Dync1li1/Khdc3/Rad21/Atrx/Racgap1/Cep192/Mki67/Trip13/Nek2	15
GO:0090502	GO:0090502	RNA phosphodiester bond hydrolysis, endonucleolytic	6/1188	19/23239	0.000268898	0.00596854	0.00505195	Rps21/Rpsa/Utp23/Bop1/Nol9/Rrs1	6
GO:2000269	GO:2000269	regulation of fibroblast apoptotic process	6/1188	19/23239	0.000268898	0.00596854	0.00505195	Ruvbl1/Ier3ip1/Sirt1/Cfdp1/Pik3ca/Ddias	6
GO:0031060	GO:0031060	regulation of histone methylation	12/1188	72/23239	0.000269435	0.00596854	0.00505195	Mthfr/Kdm3a/Prmt6/Kdm4c/L3mbtl2/Sirt1/Atrx/Ctcf/Suv39h1/Rnf20/Zfp335/Rif1	12
GO:0000245	GO:0000245	spliceosomal complex assembly	9/1188	43/23239	0.000270002	0.00596854	0.00505195	Snrpc/Rbm5/Ncbp1/Srsf1/Setx/Srsf6/Gemin2/Celf1/Sf3b1	9
GO:0090316	GO:0090316	positive regulation of intracellular protein transport	18/1188	140/23239	0.000287839	0.00633378	0.0053611	Tpr/Ubr5/Plk3/Cdk1/Prkcd/Ep300/Prkcq/Ppm1a/Ipo5/Oaz1/Mapk14/Sec16a/Zpr1/Myo1c/Pik3r1/Gsk3b/Jak2/Kif5b	18
GO:1905037	GO:1905037	autophagosome organization	14/1188	94/23239	0.000292178	0.00640002	0.00541717	Map1lc3b/Wipi2/Wdr45b/Ulk1/Rab1a/Pip4k2c/Rb1cc1/Map1lc3a/Wdr45/Gabarapl2/Atg13/Phf23/Atg9a/Tmem41b	14
GO:1902369	GO:1902369	negative regulation of RNA catabolic process	10/1188	53/23239	0.000306616	0.0066859	0.00565915	Syncrip/Pabpc1/Larp1/Hnrnpa0/Ptbp1/Tob1/Angel2/Qk/Ybx1/E2f1	10
GO:0008156	GO:0008156	negative regulation of DNA replication	8/1188	35/23239	0.000311387	0.00672902	0.00569565	Brca2/Ttf1/Wapl/Cdan1/Chek2/Pds5a/Rad17/Stag2	8
GO:0018208	GO:0018208	peptidyl-proline modification	8/1188	35/23239	0.000311387	0.00672902	0.00569565	Ppil1/Nktr/P4hb/Ntmt1/Ranbp2/Fkbp4/Ppia/Egln2	8
GO:0034497	GO:0034497	protein localization to phagophore assembly site	5/1188	13/23239	0.0003156	0.00678962	0.00574694	Wipi2/Wdr45b/Wdr45/Atg13/Atg9a	5
GO:0018023	GO:0018023	peptidyl-lysine trimethylation	9/1188	44/23239	0.000324195	0.00691301	0.00585138	Bend3/Setd2/Kdm4c/Sirt1/Pwp1/Atrx/Suv39h1/Zfp335/Ncoa6	9
GO:0034502	GO:0034502	protein localization to chromosome	13/1188	84/23239	0.000324204	0.00691301	0.00585138	Brca2/Setd2/Cdk1/Tex15/Wrap53/Wapl/Terf2ip/Gnl3l/Rad21/Atrx/Ctcf/Tcp1/Gnl3	13
GO:0009124	GO:0009124	nucleoside monophosphate biosynthetic process	19/1188	154/23239	0.000337524	0.00716532	0.00606494	Dhtkd1/Shmt1/Tigar/Adsl/Prps1/Impdh2/Uck2/Impdh1/Paics/Gart/Uqcc3/Atp5j/Pgam1/Ppat/Mtch2/Aprt/Atp5g1/Vcp/Atp5f1	19
GO:0015931	GO:0015931	nucleobase-containing compound transport	21/1188	180/23239	0.00036547	0.00772456	0.0065383	Tomm20/Ncbp1/Poldip3/Srsf1/Tpr/Setd2/Ahctf1/Rps15/Xpot/Rpsa/Pa2g4/Cpsf6/Ranbp2/Casc3/Myo1c/Rrs1/Ran/Qk/Slc25a36/Xpo1/Snupn	21
GO:0032434	GO:0032434	regulation of proteasomal ubiquitin-dependent protein catabolic process	16/1188	119/23239	0.000369735	0.00778058	0.00658572	Bag5/Arih2/Plk3/Trib3/Ubxn1/Wac/Smad7/Csnk1a1/Tlk2/Smarcc1/Nub1/Vcp/Gsk3b/Rpl11/Zfand2a/Dda1	16
GO:0050684	GO:0050684	regulation of mRNA processing	18/1188	143/23239	0.000374321	0.00784283	0.00663841	Cdk9/Rbm5/Ncbp1/Srsf1/Sltm/Srsf6/Cpsf6/Rest/Rbm8a2/Ptbp1/Rbm8a/C1qbp/Tra2a/Zc3h14/Eif4a3/Rnf20/Celf1/Rbm15	18
GO:0090407	GO:0090407	organophosphate biosynthetic process	42/1188	473/23239	0.000382307	0.00797548	0.00675069	Dhtkd1/Pdxk/Chka/Shmt1/Tigar/Pank3/Guca1a/Adsl/Prps1/Pemt/Impdh2/Uck2/Impdh1/Pi4k2a/Pip5k1a/Hexb/Prps1l3/Nmnat1/Ptdss2/Pla2g16/Ajuba/Paics/Itpkc/Dolk/Gart/Mpc2/Uqcc3/Nme2/Atp5j/Pgam1/Ppat/Ppcs/Pgap2/Mtch2/Aprt/Atp5g1/Gpat4/Mpc1/Vcp/Atp5f1/Ipmk/Pik3ca	42
GO:0008631	GO:0008631	intrinsic apoptotic signaling pathway in response to oxidative stress	9/1188	45/23239	0.000387063	0.00800539	0.00677601	Bag5/Rnf7/Gpx1/Zfp622/P4hb/Sod2/Sirt1/Mcl1/Jak2	9
GO:0033048	GO:0033048	negative regulation of mitotic sister chromatid segregation	9/1188	45/23239	0.000387063	0.00800539	0.00677601	Mad2l1bp/Apc/Tpr/Dync1li1/Khdc3/Rad21/Atrx/Cep192/Trip13	9
GO:1900076	GO:1900076	regulation of cellular response to insulin stimulus	12/1188	75/23239	0.000397993	0.00819628	0.00693758	Socs3/Prkcd/Adipor1/Prkcq/Sirt1/Ptpn11/Myo1c/Gnai2/Pik3r1/Ccnd3/Ybx1/Ptpn1	12
GO:0006997	GO:0006997	nucleus organization	16/1188	120/23239	0.00040675	0.00833321	0.00705348	Rps19/Kdm3a/Uspl1/Tmem170/Tor1b/Psme4/Ahctf1/Rtn4/Wrap53/Lemd3/Cdan1/Tor1aip1/Usp36/Zpr1/Emg1/Agfg1	16
GO:1903313	GO:1903313	positive regulation of mRNA metabolic process	13/1188	86/23239	0.000410327	0.00833321	0.00705348	Ncbp1/Ago2/Pabpc1/Cnot8/Zc3hav1/Cnot1/Tob1/Tra2a/Ythdf2/Eif4a3/Qk/Rc3h1/Hnrnpr	13
GO:0070198	GO:0070198	protein localization to chromosome, telomeric region	7/1188	28/23239	0.000411559	0.00833321	0.00705348	Brca2/Wrap53/Terf2ip/Gnl3l/Atrx/Tcp1/Gnl3	7
GO:2000727	GO:2000727	positive regulation of cardiac muscle cell differentiation	7/1188	28/23239	0.000411559	0.00833321	0.00705348	Pin1/Parp2/Ep300/Sirt1/Kat2a/Efnb2/Gsk3b	7
GO:0045862	GO:0045862	positive regulation of proteolysis	31/1188	316/23239	0.000413733	0.00834216	0.00706106	Ctsc/Rnf7/Arih2/Ruvbl1/Plk3/Ist1/Trib3/Casp8ap2/Rps3/Pdcd2/Ep300/Pten/Sirt1/Ddx3x/Rest/Smad7/Mapk14/Usp50/Fbxw11/Csnk1a1/Mtch2/Apaf1/Tnip1/Nub1/Vcp/Gsk3b/Jak2/Zfand2a/Eif2ak3/Prelid1/Rock2	31
GO:0046626	GO:0046626	regulation of insulin receptor signaling pathway	11/1188	65/23239	0.000419065	0.00841448	0.00712227	Socs3/Prkcd/Adipor1/Prkcq/Sirt1/Ptpn11/Gnai2/Pik3r1/Ccnd3/Ybx1/Ptpn1	11
GO:0016574	GO:0016574	histone ubiquitination	9/1188	46/23239	0.000459638	0.00917388	0.00776505	Cdk9/Pcgf5/Ubr5/Wac/Ddb1/Atxn7l3/Huwe1/Usp22/Rnf20	9
GO:0043434	GO:0043434	response to peptide hormone	30/1188	304/23239	0.000460693	0.00917388	0.00776505	H2afz/Syap1/Socs3/Apc/Rangap1/Rock1/Trib3/Prkcd/Adipor1/Prkcq/Cited1/Pten/Sirt1/Ptpn11/Kat2b/Zfp106/Myo1c/Sesn2/Cpeb2/Gnai2/Smarcc1/Pik3r1/Dennd4c/Ccnd3/Gsk3b/Jak2/Ybx1/Ptpn1/Rock2/Eif2b4	30
GO:0048255	GO:0048255	mRNA stabilization	8/1188	37/23239	0.000466461	0.00925051	0.00782991	Syncrip/Larp1/Hnrnpa0/Ptbp1/Angel2/Qk/Ybx1/E2f1	8
GO:1903050	GO:1903050	regulation of proteolysis involved in cellular protein catabolic process	22/1188	197/23239	0.000493617	0.00974893	0.00825179	Bag5/Ctsc/Arih2/Plk3/Gpx1/Trib3/Ubxn1/Wac/Pten/Smad7/Csnk1a1/Rps7/Rpl23/Tlk2/Gabarapl2/Smarcc1/Nub1/Vcp/Gsk3b/Rpl11/Zfand2a/Dda1	22
GO:1901988	GO:1901988	negative regulation of cell cycle phase transition	19/1188	159/23239	0.000505894	0.00995063	0.00842252	Mad2l1bp/Apc/Tpr/Plk3/Cdk1/Cdkn2d/Cdc14b/Jade1/Rfwd3/Pten/Dync1li1/Khdc3/Rad21/Nacc2/Usp47/Cep192/Rad17/Trip13/Taok1	19
GO:0072332	GO:0072332	intrinsic apoptotic signaling pathway by p53 class mediator	12/1188	77/23239	0.000509769	0.00998608	0.00845252	Hipk1/Pttg1ip/Brca2/Jmy/Ep300/Sirt1/Chek2/Rps7/Mybbp1a/Cdip1/Rpl11/E2f1	12
GO:0009156	GO:0009156	ribonucleoside monophosphate biosynthetic process	18/1188	147/23239	0.000524069	0.0102246	0.00865445	Dhtkd1/Tigar/Adsl/Prps1/Impdh2/Uck2/Impdh1/Paics/Gart/Uqcc3/Atp5j/Pgam1/Ppat/Mtch2/Aprt/Atp5g1/Vcp/Atp5f1	18
GO:0031570	GO:0031570	DNA integrity checkpoint	15/1188	111/23239	0.000527639	0.0102528	0.00867827	Cdk1/Cdc14b/Wac/Rfwd3/Ptpn11/Mapk14/Dot1l/Chek2/Tiprl/Rad17/Cdc5l/Fem1b/Dna2/E2f1/Taok1	15
GO:0007030	GO:0007030	Golgi organization	16/1188	123/23239	0.000537529	0.010403	0.00880543	Bag5/Tmed5/Gorasp1/Pi4k2a/Plk3/Pi4k2b/Cdk1/Rbsn/Arfgef1/Rab1a/Rab43/Sec16a/Csnk1a1/Tmed6/Gcc2/Map2k2	16
GO:0001825	GO:0001825	blastocyst formation	10/1188	57/23239	0.000564301	0.0108341	0.00917034	Gabpa/Uspl1/Cul3/Sf3b6/Nop2/Rtn4/Kdm4c/Cnot1/Bysl/Sf3b1	10
GO:0030968	GO:0030968	endoplasmic reticulum unfolded protein response	10/1188	57/23239	0.000564301	0.0108341	0.00917034	Serp1/Ppp1r15a/Tbl2/Ep300/Ero1l/Atf4/Pik3r1/Ficd/Eif2ak3/Ptpn1	10
GO:0006405	GO:0006405	RNA export from nucleus	12/1188	78/23239	0.000574884	0.0109501	0.00926846	Ncbp1/Poldip3/Tpr/Setd2/Rps15/Xpot/Rpsa/Pa2g4/Cpsf6/Rrs1/Ran/Xpo1	12
GO:0032479	GO:0032479	regulation of type I interferon production	12/1188	78/23239	0.000574884	0.0109501	0.00926846	Dhx33/Yy1/Setd2/Crebbp/Zc3hav1/Ptpn11/Rnf216/Gpatch3/Polr3g/Chuk/Ifnar1/Atg9a	12
GO:0008286	GO:0008286	insulin receptor signaling pathway	15/1188	112/23239	0.000580985	0.0110227	0.00932995	Socs3/Apc/Prkcd/Adipor1/Prkcq/Sirt1/Ptpn11/Zfp106/Gnai2/Smarcc1/Pik3r1/Ccnd3/Gsk3b/Ybx1/Ptpn1	15
GO:0000077	GO:0000077	DNA damage checkpoint	14/1188	101/23239	0.000617473	0.011669	0.00987702	Cdk1/Cdc14b/Wac/Rfwd3/Ptpn11/Mapk14/Dot1l/Chek2/Tiprl/Rad17/Cdc5l/Fem1b/E2f1/Taok1	14
GO:0071426	GO:0071426	ribonucleoprotein complex export from nucleus	11/1188	68/23239	0.000624176	0.0117496	0.00994524	Ncbp1/Poldip3/Tpr/Setd2/Rps15/Xpot/Rpsa/Pa2g4/Rrs1/Ran/Xpo1	11
GO:0030521	GO:0030521	androgen receptor signaling pathway	9/1188	48/23239	0.00063841	0.0119708	0.0101324	Kdm3a/Med13/Ep300/Sirt1/Hdac1/Med14/Rwdd1/Fkbp4/Rnf6	9
GO:0031297	GO:0031297	replication fork processing	7/1188	30/23239	0.000647062	0.0120584	0.0102066	Cdk9/Brca2/Fancm/Rfwd3/Mms22l/Atrx/Dna2	7
GO:0030252	GO:0030252	growth hormone secretion	6/1188	22/23239	0.000648086	0.0120584	0.0102066	Serp1/Sirt1/Ptpn11/Rab1a/Cdk16/Chd7	6
GO:0051053	GO:0051053	negative regulation of DNA metabolic process	18/1188	150/23239	0.000667927	0.0122532	0.0103715	Brca2/Ubr5/Ttf1/Nmnat1/Rps3/Polq/Wapl/Mcrs1/Terf2ip/Gnl3l/Cdan1/Chek2/Pds5a/Rad17/Stag2/Smchd1/Ercc4/Rif1	18
GO:0000054	GO:0000054	ribosomal subunit export from nucleus	5/1188	15/23239	0.000675881	0.0122532	0.0103715	Rps15/Pa2g4/Rrs1/Ran/Xpo1	5
GO:0033750	GO:0033750	ribosome localization	5/1188	15/23239	0.000675881	0.0122532	0.0103715	Rps15/Pa2g4/Rrs1/Ran/Xpo1	5
GO:0071243	GO:0071243	cellular response to arsenic-containing substance	5/1188	15/23239	0.000675881	0.0122532	0.0103715	Ddx3x/Mknk2/Cpeb2/Vcp/Zfand2a	5
GO:0010569	GO:0010569	regulation of double-strand break repair via homologous recombination	8/1188	39/23239	0.000678897	0.0122532	0.0103715	Setd2/Tex15/Polq/Wrap53/Terf2ip/Rad51ap1/Smchd1/Rif1	8
GO:0010613	GO:0010613	positive regulation of cardiac muscle hypertrophy	8/1188	39/23239	0.000678897	0.0122532	0.0103715	Cdk9/Pin1/Rock1/Parp2/Ep300/Sirt1/Mef2a/Rock2	8
GO:0014742	GO:0014742	positive regulation of muscle hypertrophy	8/1188	39/23239	0.000678897	0.0122532	0.0103715	Cdk9/Pin1/Rock1/Parp2/Ep300/Sirt1/Mef2a/Rock2	8
GO:0030866	GO:0030866	cortical actin cytoskeleton organization	8/1188	39/23239	0.000678897	0.0122532	0.0103715	Rock1/Strip1/Wipf2/Llgl2/Arf6/Racgap1/Nckap1/Rock2	8
GO:0071166	GO:0071166	ribonucleoprotein complex localization	11/1188	69/23239	0.000708797	0.0127451	0.0107879	Ncbp1/Poldip3/Tpr/Setd2/Rps15/Xpot/Rpsa/Pa2g4/Rrs1/Ran/Xpo1	11
GO:0035967	GO:0035967	cellular response to topologically incorrect protein	13/1188	91/23239	0.000714287	0.0127961	0.010831	Serp1/Cul3/Ppp1r15a/Tbl2/Ep300/Ero1l/Atf4/Hdac6/Pik3r1/Vcp/Ficd/Eif2ak3/Ptpn1	13
GO:0006260	GO:0006260	DNA replication	25/1188	243/23239	0.000727177	0.0129788	0.0109856	Rbbp6/Cdk9/Brca2/Ccna2/Baz1a/Fancm/Ttf1/Cdk1/Polq/Wapl/Rfwd3/Ccne1/Cdan1/Usp37/Chek2/Esco1/Mms22l/Pds5a/Atrx/Dbf4/Zpr1/Mcm6/Rad17/Stag2/Dna2	25
GO:0007032	GO:0007032	endosome organization	9/1188	49/23239	0.000747052	0.0132056	0.0111777	Aqp11/Pi4k2a/Rab5a/Pi4k2b/Exoc8/Als2/Usp50/Snx3/Arfgef2	9
GO:0021915	GO:0021915	neural tube development	21/1188	190/23239	0.0007504	0.0132056	0.0111777	Folr1/Mthfr/Setd2/Gpr161/Lias/Brpf1/Ovol2/Rarg/C2cd3/Kat2a/Rps7/Map3k7/Apaf1/Luzp1/Cecr2/Nf1/Nckap1/Ipmk/Tulp3/Hectd1/Rock2	21
GO:0010506	GO:0010506	regulation of autophagy	24/1188	230/23239	0.000753066	0.0132056	0.0111777	Ctsa/Tigar/Eif4g2/Rock1/Plk3/Eif4g1/Ulk1/Wac/Larp1/Sirt1/Cptp/Pip4k2c/Mcl1/Fyco1/Bnip3/Usp36/Cttn/Map3k7/Sesn2/Hdac6/Gsk3b/Phf23/Ercc4/Usp33	24
GO:0072522	GO:0072522	purine-containing compound biosynthetic process	24/1188	230/23239	0.000753066	0.0132056	0.0111777	Dhtkd1/Shmt1/Tigar/Pank3/Guca1a/Adsl/Prps1/Impdh2/Impdh1/Prps1l3/Paics/Gart/Mpc2/Uqcc3/Nme2/Atp5j/Pgam1/Ppcs/Mtch2/Aprt/Atp5g1/Mpc1/Vcp/Atp5f1	24
GO:0006986	GO:0006986	response to unfolded protein	14/1188	103/23239	0.00075359	0.0132056	0.0111777	Dnajb9/Fbxo6/Serp1/Ppp1r15a/Tbl2/Ep300/Ube2j2/Ero1l/Tmem129/Atf4/Pik3r1/Ficd/Eif2ak3/Ptpn1	14
GO:0043276	GO:0043276	anoikis	7/1188	31/23239	0.000799271	0.0139152	0.0117783	Chek2/Ankrd13c/Mcl1/Map3k7/Mybbp1a/E2f1/Pik3ca	7
GO:0000082	GO:0000082	G1/S transition of mitotic cell cycle	19/1188	165/23239	0.000799858	0.0139152	0.0117783	Rps6/Plk3/Eif4g1/Cdkn2d/Jade1/Rfwd3/Ccne1/Pten/Crebbp/Ddx3x/Usp37/Npat/Nacc2/Dbf4/Zpr1/Rbbp8/Ccnd3/E2f1/Bach1	19
GO:0035307	GO:0035307	positive regulation of protein dephosphorylation	8/1188	40/23239	0.00081105	0.0140013	0.0118511	Ppp1r15b/Pin1/Ppp1r15a/Sppl3/Prkcd/Ptbp1/Ppp1r12a/Jak2	8
GO:0032606	GO:0032606	type I interferon production	12/1188	81/23239	0.000813522	0.0140013	0.0118511	Dhx33/Yy1/Setd2/Crebbp/Zc3hav1/Ptpn11/Rnf216/Gpatch3/Polr3g/Chuk/Ifnar1/Atg9a	12
GO:1903321	GO:1903321	negative regulation of protein modification by small protein conjugation or removal	12/1188	81/23239	0.000813522	0.0140013	0.0118511	Bag5/Pias3/Ubr5/Rps3/Ubxn1/Gnl3l/Smad7/Rps7/Rpl23/Ivns1abp/Rpl11/Chp1	12
GO:0014020	GO:0014020	primary neural tube formation	15/1188	116/23239	0.000842779	0.0144309	0.0122148	Folr1/Mthfr/Setd2/Lias/Ovol2/Rarg/Kat2a/Rps7/Apaf1/Luzp1/Cecr2/Nckap1/Tulp3/Hectd1/Rock2	15
GO:0001838	GO:0001838	embryonic epithelial tube formation	18/1188	153/23239	0.000844474	0.0144309	0.0122148	Folr1/Mthfr/Setd2/Lias/Brpf1/Ovol2/Rarg/Kat2a/Rps7/Map3k7/Apaf1/Luzp1/Cecr2/Nckap1/Ipmk/Tulp3/Hectd1/Rock2	18
GO:0019058	GO:0019058	viral life cycle	21/1188	192/23239	0.000859676	0.0146388	0.0123907	Rab5a/Ist1/P4hb/Pabpc1/Zfp639/Ddb1/Larp1/Zc3hav1/Ddx3x/Rab1a/Ctsb/Pde12/Rab43/Eea1/Hacd3/Ppia/Snf8/Snx3/Vcp/Pkn2/Rock2	21
GO:0044843	GO:0044843	cell cycle G1/S phase transition	20/1188	179/23239	0.000865311	0.0146829	0.012428	Rps6/Ccna2/Plk3/Eif4g1/Cdkn2d/Jade1/Rfwd3/Ccne1/Pten/Crebbp/Ddx3x/Usp37/Npat/Nacc2/Dbf4/Zpr1/Rbbp8/Ccnd3/E2f1/Bach1	20
GO:0071456	GO:0071456	cellular response to hypoxia	13/1188	93/23239	0.000880205	0.0148832	0.0125976	Tigar/Vhl/Plk3/P4hb/Tbl2/Pten/Sirt1/Ajuba/Bnip3/Cpeb2/Suv39h1/Chchd2/Bach1	13
GO:0031397	GO:0031397	negative regulation of protein ubiquitination	11/1188	71/23239	0.000906758	0.0152704	0.0129253	Bag5/Ubr5/Rps3/Ubxn1/Gnl3l/Smad7/Rps7/Rpl23/Ivns1abp/Rpl11/Chp1	11
GO:0048524	GO:0048524	positive regulation of viral process	12/1188	82/23239	0.000909443	0.0152704	0.0129253	P4hb/Pabpc1/Zfp639/Ep300/Ddb1/Larp1/Ddx3x/Pde12/Hacd3/Ppia/Chd1/Pkn2	12
GO:0000463	GO:0000463	maturation of LSU-rRNA from tricistronic rRNA transcript (SSU-rRNA, 5.8S rRNA, LSU-rRNA)	5/1188	16/23239	0.000941921	0.0157608	0.0133404	Znhit3/Bop1/Rpl35/Znhit6/Nol9	5
GO:1901991	GO:1901991	negative regulation of mitotic cell cycle phase transition	17/1188	142/23239	0.000955502	0.0159327	0.013486	Mad2l1bp/Apc/Tpr/Plk3/Cdk1/Jade1/Rfwd3/Pten/Dync1li1/Khdc3/Rad21/Nacc2/Usp47/Cep192/Rad17/Trip13/Taok1	17
GO:0045841	GO:0045841	negative regulation of mitotic metaphase/anaphase transition	8/1188	41/23239	0.000963088	0.0160039	0.0135461	Mad2l1bp/Apc/Tpr/Dync1li1/Khdc3/Rad21/Cep192/Trip13	8
GO:0051304	GO:0051304	chromosome separation	13/1188	94/23239	0.00097458	0.0161129	0.0136385	Mad2l1bp/Apc/Cul3/Tpr/Fancm/Dync1li1/Khdc3/Ncapd2/Rad21/Cep192/Trip13/Ercc4/Espl1	13
GO:0070059	GO:0070059	intrinsic apoptotic signaling pathway in response to endoplasmic reticulum stress	10/1188	61/23239	0.000979683	0.0161129	0.0136385	Casp3/Trib3/Sirt1/Ero1l/Serinc3/Apaf1/Atf4/Gsk3b/Eif2ak3/Ptpn1	10
GO:1905268	GO:1905268	negative regulation of chromatin organization	10/1188	61/23239	0.000979683	0.0161129	0.0136385	Kdm3a/Ubr5/Noc2l/Prmt6/Kdm4c/L3mbtl2/Sirt1/Atad2b/Atad2/Kdm5a	10
GO:1901293	GO:1901293	nucleoside phosphate biosynthetic process	27/1188	276/23239	0.000985582	0.0161548	0.0136739	Dhtkd1/Shmt1/Tigar/Pank3/Guca1a/Adsl/Prps1/Impdh2/Uck2/Impdh1/Prps1l3/Nmnat1/Paics/Gart/Mpc2/Uqcc3/Nme2/Atp5j/Pgam1/Ppat/Ppcs/Mtch2/Aprt/Atp5g1/Mpc1/Vcp/Atp5f1	27
GO:0016331	GO:0016331	morphogenesis of embryonic epithelium	20/1188	181/23239	0.000994106	0.0162393	0.0137454	Folr1/Mthfr/Setd2/Lias/Brpf1/Ovol2/Rarg/Grsf1/Kat2a/Rps7/Map3k7/Llgl2/Apaf1/Luzp1/Cecr2/Nckap1/Ipmk/Tulp3/Hectd1/Rock2	20
GO:0009127	GO:0009127	purine nucleoside monophosphate biosynthetic process	17/1188	143/23239	0.00103392	0.0167759	0.0141996	Dhtkd1/Tigar/Adsl/Prps1/Impdh2/Impdh1/Paics/Gart/Uqcc3/Atp5j/Pgam1/Ppat/Mtch2/Aprt/Atp5g1/Vcp/Atp5f1	17
GO:0009168	GO:0009168	purine ribonucleoside monophosphate biosynthetic process	17/1188	143/23239	0.00103392	0.0167759	0.0141996	Dhtkd1/Tigar/Adsl/Prps1/Impdh2/Impdh1/Paics/Gart/Uqcc3/Atp5j/Pgam1/Ppat/Mtch2/Aprt/Atp5g1/Vcp/Atp5f1	17
GO:0006520	GO:0006520	cellular amino acid metabolic process	26/1188	263/23239	0.0010398	0.0168148	0.0142325	Gcsh/Psat1/Shmt1/Glul/Prdx4/Mthfr/Odc1/Gldc/Pemt/Apc/P4hb/Nmnat1/Adi1/Ero1l/Gls2/Mars2/Iars/Ivd/Gart/Bhmt2/Ppat/Azin1/Gpt2/Aars/Egln2/Gls	26
GO:0006352	GO:0006352	DNA-templated transcription, initiation	13/1188	95/23239	0.00107727	0.0173625	0.0146961	Dr1/Taf4b/Ttf1/Setx/Med13/Gtf3c1/Taf2/Med14/Tfb2m/Polr3h/Crcp/Polr1e/Cand1	13
GO:0007098	GO:0007098	centrosome cycle	15/1188	119/23239	0.00109931	0.0175882	0.0148872	Brca2/Sac3d1/Dync1li1/Haus2/C2cd3/Kat2b/Kat2a/Cep192/Haus6/Nde1/Ppp1r12a/Xpo1/Nek2/Usp33/Rock2	15
GO:0000055	GO:0000055	ribosomal large subunit export from nucleus	4/1188	10/23239	0.00111318	0.0175882	0.0148872	Pa2g4/Rrs1/Ran/Xpo1	4
GO:0000183	GO:0000183	chromatin silencing at rDNA	4/1188	10/23239	0.00111318	0.0175882	0.0148872	Ubtf/Bend3/Sirt1/Suv39h1	4
GO:0000492	GO:0000492	box C/D snoRNP assembly	4/1188	10/23239	0.00111318	0.0175882	0.0148872	Znhit3/Ruvbl1/Nufip1/Znhit6	4
GO:0075522	GO:0075522	IRES-dependent viral translational initiation	4/1188	10/23239	0.00111318	0.0175882	0.0148872	Ptbp1/Eif3b/Eif3f/Denr	4
GO:1902415	GO:1902415	regulation of mRNA binding	4/1188	10/23239	0.00111318	0.0175882	0.0148872	Cdk9/Eif4g1/Eif3c/Eif4a3	4
GO:0046390	GO:0046390	ribose phosphate biosynthetic process	23/1188	223/23239	0.00112349	0.0176932	0.014976	Dhtkd1/Tigar/Pank3/Adsl/Prps1/Impdh2/Uck2/Impdh1/Prps1l3/Paics/Gart/Mpc2/Uqcc3/Nme2/Atp5j/Pgam1/Ppcs/Mtch2/Aprt/Atp5g1/Mpc1/Vcp/Atp5f1	23
GO:0031057	GO:0031057	negative regulation of histone modification	8/1188	42/23239	0.0011371	0.0177912	0.015059	Kdm3a/Ubr5/Noc2l/Prmt6/Kdm4c/L3mbtl2/Sirt1/Kdm5a	8
GO:2000816	GO:2000816	negative regulation of mitotic sister chromatid separation	8/1188	42/23239	0.0011371	0.0177912	0.015059	Mad2l1bp/Apc/Tpr/Dync1li1/Khdc3/Rad21/Cep192/Trip13	8
GO:0006342	GO:0006342	chromatin silencing	11/1188	73/23239	0.00114837	0.0179093	0.015159	Ubtf/Bend3/Sirt1/Hdac1/Atad2b/Dot1l/Atad2/Hira/Suv39h1/Smchd1/Rif1	11
GO:0006310	GO:0006310	DNA recombination	26/1188	265/23239	0.0011606	0.0180115	0.0152455	Yy1/Psmc3ip/Brca2/Smc6/Fancm/Ruvbl1/Setd2/Setx/Tex15/Polq/Wrap53/Hmgb3/Mcrs1/Rfwd3/Terf2ip/Exd2/Zfyve26/Mms22l/Tfrc/Nabp1/Rbbp8/Rad51ap1/Trip13/Smchd1/Ercc4/Rif1	26
GO:0071824	GO:0071824	protein-DNA complex subunit organization	22/1188	210/23239	0.00116239	0.0180115	0.0152455	Set/Dr1/Brd2/Ptma/Setd2/Psme4/Ep300/Srcap/Cenpt/Arid2/Rpl23/Atrx/Hira/Ubn1/Nap1l1/Cabin1/Smarcc1/Ctcf/Kat6a/Polr1e/Ipo4/Cand1	22
GO:0018022	GO:0018022	peptidyl-lysine methylation	15/1188	120/23239	0.00119825	0.0185076	0.0156654	Rlf/Kdm3a/Bend3/Setd2/Prmt6/Kdm4c/Sirt1/Pwp1/Dot1l/Atrx/Eef1akmt1/Suv39h1/Zfp335/Rif1/Ncoa6	15
GO:0034968	GO:0034968	histone lysine methylation	14/1188	108/23239	0.00120864	0.0186084	0.0157507	Rlf/Kdm3a/Bend3/Setd2/Prmt6/Kdm4c/Sirt1/Pwp1/Dot1l/Atrx/Suv39h1/Zfp335/Rif1/Ncoa6	14
GO:0031023	GO:0031023	microtubule organizing center organization	16/1188	133/23239	0.00126367	0.0192488	0.0162927	Brca2/Sac3d1/Dync1li1/Haus2/C2cd3/Kat2b/Kat2a/Cep192/Haus6/Nde1/Ppp1r12a/Xpo1/Gcc2/Nek2/Usp33/Rock2	16
GO:0016239	GO:0016239	positive regulation of macroautophagy	10/1188	63/23239	0.00126619	0.0192488	0.0162927	Ulk1/Wac/Larp1/Sirt1/Pip4k2c/Fyco1/Bnip3/Map3k7/Sesn2/Hdac6	10
GO:2000756	GO:2000756	regulation of peptidyl-lysine acetylation	10/1188	63/23239	0.00126619	0.0192488	0.0162927	Noc2l/Ep300/L3mbtl2/Sirt1/Hdac1/Kat2b/Kat2a/Setd5/Ctcf/Arid5a	10
GO:0006164	GO:0006164	purine nucleotide biosynthetic process	23/1188	225/23239	0.00126621	0.0192488	0.0162927	Dhtkd1/Tigar/Pank3/Guca1a/Adsl/Prps1/Impdh2/Impdh1/Prps1l3/Paics/Gart/Mpc2/Uqcc3/Nme2/Atp5j/Pgam1/Ppcs/Mtch2/Aprt/Atp5g1/Mpc1/Vcp/Atp5f1	23
GO:0036124	GO:0036124	histone H3-K9 trimethylation	5/1188	17/23239	0.00127857	0.0193148	0.0163487	Bend3/Kdm4c/Sirt1/Atrx/Suv39h1	5
GO:1904666	GO:1904666	regulation of ubiquitin protein ligase activity	5/1188	17/23239	0.00127857	0.0193148	0.0163487	Cdc14b/Pten/Rps7/Rpl23/Rpl11	5
GO:1901652	GO:1901652	response to peptide	32/1188	353/23239	0.00128637	0.0193316	0.0163628	H2afz/Syap1/Socs3/Apc/Rangap1/Rock1/Trib3/Prkcd/Adipor1/Prkcq/Cited1/Pten/Sirt1/Ptpn11/Mapk14/Kat2b/Zfp106/Rpl23/Myo1c/Sesn2/Cpeb2/Gnai2/Smarcc1/Pik3r1/Dennd4c/Ccnd3/Gsk3b/Jak2/Ybx1/Ptpn1/Rock2/Eif2b4	32
GO:0008625	GO:0008625	extrinsic apoptotic signaling pathway via death domain receptors	11/1188	74/23239	0.0012877	0.0193316	0.0163628	Tnfrsf22/Gpx1/Casp8ap2/Dedd2/Pten/Ddx3x/Raf1/Pik3r1/Fem1b/Nf1/Rock2	11
GO:0043489	GO:0043489	RNA stabilization	8/1188	43/23239	0.0013353	0.0197558	0.0167219	Syncrip/Larp1/Hnrnpa0/Ptbp1/Angel2/Qk/Ybx1/E2f1	8
GO:1902100	GO:1902100	negative regulation of metaphase/anaphase transition of cell cycle	8/1188	43/23239	0.0013353	0.0197558	0.0167219	Mad2l1bp/Apc/Tpr/Dync1li1/Khdc3/Rad21/Cep192/Trip13	8
GO:0009259	GO:0009259	ribonucleotide metabolic process	36/1188	413/23239	0.00133656	0.0197558	0.0167219	Dhtkd1/Tigar/Pank3/Adsl/Prps1/Impdh2/Uck2/Impdh1/Bend3/Cdk1/Nudt4/Nmnat1/Clpx/Paics/Uqcrfs1/Uqcrc1/Ldha/Gart/Pde12/Mpc2/Uqcc3/Nme2/Crot/Atp5j/Pgam1/Parg/Ppcs/Mtch2/Aprt/Atp5g1/Gpat4/Ran/Mpc1/Vcp/Tefm/Atp5f1	36
GO:0006163	GO:0006163	purine nucleotide metabolic process	37/1188	428/23239	0.00133819	0.0197558	0.0167219	Dhtkd1/Tigar/Pank3/Guca1a/Adsl/Prps1/Impdh2/Impdh1/Bend3/Prps1l3/Cdk1/Nudt4/Nmnat1/Clpx/Paics/Uqcrfs1/Uqcrc1/Ldha/Gart/Pde12/Mpc2/Uqcc3/Nme2/Crot/Atp5j/Pgam1/Parg/Ppcs/Mtch2/Aprt/Atp5g1/Gpat4/Ran/Mpc1/Vcp/Tefm/Atp5f1	37
GO:0030071	GO:0030071	regulation of mitotic metaphase/anaphase transition	9/1188	53/23239	0.00134216	0.0197558	0.0167219	Mad2l1bp/Apc/Cul3/Tpr/Dync1li1/Khdc3/Rad21/Cep192/Trip13	9
GO:0043666	GO:0043666	regulation of phosphoprotein phosphatase activity	9/1188	53/23239	0.00134216	0.0197558	0.0167219	Ppp1r15b/Ppp1r2/Rock1/Ppp1r15a/Tiprl/Gnai2/Ppp1r12a/Jak2/Rock2	9
GO:0051443	GO:0051443	positive regulation of ubiquitin-protein transferase activity	6/1188	25/23239	0.00134876	0.0197558	0.0167219	Rps2/Pin1/Trib3/Cdc14b/Pten/Ube2l3	6
GO:1902230	GO:1902230	negative regulation of intrinsic apoptotic signaling pathway in response to DNA damage	6/1188	25/23239	0.00134876	0.0197558	0.0167219	Cdkn2d/Sirt1/Snai1/Usp47/Tpt1/Ddias	6
GO:0006979	GO:0006979	response to oxidative stress	35/1188	399/23239	0.00138926	0.0202875	0.0171719	Bag5/Ppp1r15b/Rnf7/Prdx4/Plk3/Gpx1/Casp3/Zfp622/P4hb/Setx/Prkcd/Lias/Rps3/Traf2/Als2/Sod2/Sirt1/Glrx2/Ppp2cb/Psmb5/Hdac1/Rwdd1/Mcl1/Gpx4/Bnip3/Sesn2/Atf4/Prdx5/Cpeb2/Hdac6/Hnrnpm/Adprhl2/Chuk/Jak2/Ddias	35
GO:0035264	GO:0035264	multicellular organism growth	22/1188	213/23239	0.00139734	0.0203438	0.0172196	Rbbp6/Brca2/Stk40/Kmt2c/Slc12a2/Alms1/Rarg/Mkks/Sptbn2/Ptpn11/Sos1/Kat2a/Atrx/Llgl2/Chd7/Gpat4/Wwtr1/Dhcr7/Gpd2/Suv39h1/Celf1/Pik3ca	22
GO:0006575	GO:0006575	cellular modified amino acid metabolic process	18/1188	160/23239	0.00141747	0.0204933	0.0173461	Shmt1/Prdx4/Folr1/Mthfr/Pemt/Gpx1/P4hb/Ptdss2/Sod2/Ero1l/Gart/Crot/Serinc3/Bhmt2/Gpx4/Hmgn5/Eif2ak3/Egln2	18
GO:0072175	GO:0072175	epithelial tube formation	18/1188	160/23239	0.00141747	0.0204933	0.0173461	Folr1/Mthfr/Setd2/Lias/Brpf1/Ovol2/Rarg/Kat2a/Rps7/Map3k7/Apaf1/Luzp1/Cecr2/Nckap1/Ipmk/Tulp3/Hectd1/Rock2	18
GO:0006356	GO:0006356	regulation of transcription by RNA polymerase I	7/1188	34/23239	0.0014304	0.0204933	0.0173461	Dhx33/Nol11/Ubtf/Ppp1r15a/Pwp1/Atf4/Eif2ak3	7
GO:0016572	GO:0016572	histone phosphorylation	7/1188	34/23239	0.0014304	0.0204933	0.0173461	Cdk9/Pim3/Ccna2/Akap8/Prkcd/Jak2/Baz1b	7
GO:0051298	GO:0051298	centrosome duplication	10/1188	64/23239	0.00143313	0.0204933	0.0173461	Brca2/Sac3d1/C2cd3/Kat2b/Kat2a/Cep192/Nde1/Xpo1/Usp33/Rock2	10
GO:2001244	GO:2001244	positive regulation of intrinsic apoptotic signaling pathway	10/1188	64/23239	0.00143313	0.0204933	0.0173461	Rps3/Sirt1/Mcl1/Serinc3/Rps7/Mtch2/Nacc2/Ei24/Rpl11/Eif2ak3	10
GO:0009165	GO:0009165	nucleotide biosynthetic process	26/1188	269/23239	0.00143902	0.0205167	0.017366	Dhtkd1/Shmt1/Tigar/Pank3/Guca1a/Adsl/Prps1/Impdh2/Uck2/Impdh1/Prps1l3/Nmnat1/Paics/Gart/Mpc2/Uqcc3/Nme2/Atp5j/Pgam1/Ppcs/Mtch2/Aprt/Atp5g1/Mpc1/Vcp/Atp5f1	26
GO:0032886	GO:0032886	regulation of microtubule-based process	23/1188	228/23239	0.00150939	0.0214565	0.0181614	Apc/Tpr/Stmn3/Rps3/Mkks/Dync1li1/Kat2b/Fkbp4/Ska1/Kat2a/Nav3/Hdac6/Cep192/Ska3/Stag2/Xpo1/Gsk3b/Dnah11/Rhot1/Mark2/Nek2/Taok1/Rock2	23
GO:0007051	GO:0007051	spindle organization	18/1188	161/23239	0.00152147	0.0215645	0.0182529	Tpr/Sac3d1/Rps3/Tubgcp6/Cdc14b/Haus2/Ntmt1/Chek2/Khdc3/Atrx/Racgap1/Cep192/Haus6/Vcp/Stag2/Spc25/Espl1/Nek2	18
GO:0035065	GO:0035065	regulation of histone acetylation	9/1188	54/23239	0.00153873	0.0216817	0.0183521	Noc2l/Ep300/L3mbtl2/Sirt1/Kat2b/Kat2a/Setd5/Ctcf/Arid5a	9
GO:0055025	GO:0055025	positive regulation of cardiac muscle tissue development	9/1188	54/23239	0.00153873	0.0216817	0.0183521	Pin1/Cdk1/Parp2/Ep300/Sirt1/Mapk14/Kat2a/Efnb2/Gsk3b	9
GO:1905819	GO:1905819	negative regulation of chromosome separation	8/1188	44/23239	0.00155998	0.0219171	0.0185513	Mad2l1bp/Apc/Tpr/Dync1li1/Khdc3/Rad21/Cep192/Trip13	8
GO:0016241	GO:0016241	regulation of macroautophagy	13/1188	99/23239	0.00158282	0.022109	0.0187137	Tigar/Ulk1/Wac/Larp1/Sirt1/Pip4k2c/Fyco1/Bnip3/Usp36/Map3k7/Sesn2/Hdac6/Phf23	13
GO:0051225	GO:0051225	spindle assembly	13/1188	99/23239	0.00158282	0.022109	0.0187137	Tpr/Sac3d1/Rps3/Tubgcp6/Cdc14b/Haus2/Chek2/Khdc3/Racgap1/Cep192/Haus6/Stag2/Nek2	13
GO:1903362	GO:1903362	regulation of cellular protein catabolic process	23/1188	229/23239	0.00159887	0.022221	0.0188086	Bag5/Ctsc/Pttg1ip/Arih2/Plk3/Gpx1/Trib3/Ubxn1/Wac/Pten/Smad7/Csnk1a1/Rps7/Rpl23/Tlk2/Gabarapl2/Smarcc1/Nub1/Vcp/Gsk3b/Rpl11/Zfand2a/Dda1	23
GO:0034728	GO:0034728	nucleosome organization	16/1188	136/23239	0.00160006	0.022221	0.0188086	Set/Brd2/Ptma/Setd2/Psme4/Srcap/Arid2/Atrx/Hira/Ubn1/Nap1l1/Cabin1/Smarcc1/Ctcf/Kat6a/Ipo4	16
GO:0034644	GO:0034644	cellular response to UV	11/1188	76/23239	0.0016081	0.0222685	0.0188487	Yy1/Noc2l/Ep300/Ddb1/Sirt1/Crebbp/Ei24/Usp47/Pik3r1/Ercc4/Ddias	11
GO:0009150	GO:0009150	purine ribonucleotide metabolic process	35/1188	403/23239	0.00164542	0.0227199	0.0192308	Dhtkd1/Tigar/Pank3/Adsl/Prps1/Impdh2/Impdh1/Bend3/Cdk1/Nudt4/Nmnat1/Clpx/Paics/Uqcrfs1/Uqcrc1/Ldha/Gart/Pde12/Mpc2/Uqcc3/Nme2/Crot/Atp5j/Pgam1/Parg/Ppcs/Mtch2/Aprt/Atp5g1/Gpat4/Ran/Mpc1/Vcp/Tefm/Atp5f1	35
GO:0009260	GO:0009260	ribonucleotide biosynthetic process	22/1188	216/23239	0.0016718	0.0229173	0.0193979	Dhtkd1/Tigar/Pank3/Adsl/Prps1/Impdh2/Uck2/Impdh1/Paics/Gart/Mpc2/Uqcc3/Nme2/Atp5j/Pgam1/Ppcs/Mtch2/Aprt/Atp5g1/Mpc1/Vcp/Atp5f1	22
GO:0043457	GO:0043457	regulation of cellular respiration	6/1188	26/23239	0.00167836	0.0229173	0.0193979	Cdk1/Noa1/Bnip3/Vcp/Prelid1/Pik3ca	6
GO:0001731	GO:0001731	formation of translation preinitiation complex	4/1188	11/23239	0.00167873	0.0229173	0.0193979	Rps2/Denr/Eif5/Eif4h	4
GO:0035330	GO:0035330	regulation of hippo signaling	4/1188	11/23239	0.00167873	0.0229173	0.0193979	Ajuba/Nf2/Mark3/Wwc2	4
GO:0006595	GO:0006595	polyamine metabolic process	5/1188	18/23239	0.00169638	0.0230216	0.0194862	Odc1/Oaz1/Azin1/Amd2/Sat1	5
GO:0051444	GO:0051444	negative regulation of ubiquitin-protein transferase activity	5/1188	18/23239	0.00169638	0.0230216	0.0194862	Bag5/Smad7/Rps7/Rpl23/Rpl11	5
GO:0051348	GO:0051348	negative regulation of transferase activity	24/1188	244/23239	0.00170071	0.0230216	0.0194862	Bag5/Tigar/Apc/Casp3/Trib3/Prkcd/Wnk1/Mcrs1/Sirt1/Gadd45b/Ajuba/Nf2/Hipk3/Smad7/Kat2b/Cbl/Rps7/Rpl23/Wwtr1/Gsk3b/Nf1/Rpl11/Chp1/Ptpn1	24
GO:0030518	GO:0030518	intracellular steroid hormone receptor signaling pathway	14/1188	112/23239	0.00172108	0.0232321	0.0196643	Kdm3a/Ubr5/Med13/Ep300/Strn3/Sirt1/Hdac1/Med14/Rwdd1/Cnot1/Fkbp4/Rnf6/Klf9/Jak2	14
GO:0007088	GO:0007088	regulation of mitotic nuclear division	19/1188	176/23239	0.00172589	0.0232321	0.0196643	Mad2l1bp/Apc/Ccna2/Cul3/Tpr/Ccnjl/Cdc14b/Ccne1/Dync1li1/Ube2c/Khdc3/Rad21/Atrx/Cep192/Ccnd3/Stag2/Mki67/Trip13/Nek2	19
GO:0045839	GO:0045839	negative regulation of mitotic nuclear division	9/1188	55/23239	0.00175776	0.0235951	0.0199716	Mad2l1bp/Apc/Tpr/Dync1li1/Khdc3/Rad21/Atrx/Cep192/Trip13	9
GO:0061647	GO:0061647	histone H3-K9 modification	8/1188	45/23239	0.00181359	0.0242365	0.0205145	Kdm3a/Bend3/Kdm4c/Sirt1/Kat2b/Atrx/Suv39h1/Rif1	8
GO:0006513	GO:0006513	protein monoubiquitination	10/1188	66/23239	0.00182063	0.0242365	0.0205145	Ube2o/Pcgf5/Cul3/Wac/Ddb1/Atxn7l3/Huwe1/Cbl/Ube4b/Rnf20	10
GO:2000779	GO:2000779	regulation of double-strand break repair	10/1188	66/23239	0.00182063	0.0242365	0.0205145	Ubr5/Setd2/Tex15/Polq/Wrap53/Terf2ip/Rad51ap1/Smchd1/Dek/Rif1	10
GO:0009755	GO:0009755	hormone-mediated signaling pathway	18/1188	164/23239	0.00187299	0.0248648	0.0210463	Kdm3a/Ubr5/Adipor1/Med13/Ep300/Strn3/Rarg/Sirt1/Hdac1/Med14/Ptpn11/Rwdd1/Cnot1/Fkbp4/Rnf6/Ncoa1/Klf9/Jak2	18
GO:0071559	GO:0071559	response to transforming growth factor beta	21/1188	205/23239	0.00196165	0.0259195	0.0219391	Folr1/Pin1/Rock1/Amhr2/Itgb5/Eid2/Ep300/Cited1/Ppm1a/Ovol2/Lemd3/Sirt1/Crebbp/Bambi/Smad7/Trim33/Map3k7/Apaf1/Gcnt2/Crkl/Rock2	21
GO:0072521	GO:0072521	purine-containing compound metabolic process	39/1188	468/23239	0.00196319	0.0259195	0.0219391	Dhtkd1/Shmt1/Tigar/Pank3/Guca1a/Adsl/Prps1/Pemt/Impdh2/Impdh1/Bend3/Prps1l3/Cdk1/Nudt4/Nmnat1/Clpx/Paics/Uqcrfs1/Uqcrc1/Ldha/Gart/Pde12/Mpc2/Uqcc3/Nme2/Crot/Atp5j/Pgam1/Parg/Ppcs/Mtch2/Aprt/Atp5g1/Gpat4/Ran/Mpc1/Vcp/Tefm/Atp5f1	39
GO:1902099	GO:1902099	regulation of metaphase/anaphase transition of cell cycle	9/1188	56/23239	0.00200104	0.026347	0.0223009	Mad2l1bp/Apc/Cul3/Tpr/Dync1li1/Khdc3/Rad21/Cep192/Trip13	9
GO:0009314	GO:0009314	response to radiation	34/1188	393/23239	0.0020252	0.0265909	0.0225074	Yy1/Tigar/Guca1a/Brca2/Noc2l/Plk3/Gpx1/Casp3/Ppp1cc/Cdkn2d/Ep300/Brat1/Rfwd3/Ddb1/Sod2/Sirt1/Crebbp/Mapk14/Sdf4/Chek2/Ube4b/Mtch2/Tlk2/Ei24/Usp47/Pik3r1/Nabp1/Ddhd2/Rad51ap1/Usp1/Nf1/Ercc4/Ints3/Ddias	34
GO:0051567	GO:0051567	histone H3-K9 methylation	7/1188	36/23239	0.0020306	0.0265909	0.0225074	Kdm3a/Bend3/Kdm4c/Sirt1/Atrx/Suv39h1/Rif1	7
GO:0000460	GO:0000460	maturation of 5.8S rRNA	6/1188	27/23239	0.00206566	0.0268314	0.0227109	C1d/Rps21/Rpsa/Bop1/Nol9/Rrs1	6
GO:0006734	GO:0006734	NADH metabolic process	6/1188	27/23239	0.00206566	0.0268314	0.0227109	Tigar/Mdh2/Gpd1l/Ldha/Gpd2/Vcp	6
GO:0051570	GO:0051570	regulation of histone H3-K9 methylation	6/1188	27/23239	0.00206566	0.0268314	0.0227109	Kdm3a/Kdm4c/Sirt1/Atrx/Suv39h1/Rif1	6
GO:0016458	GO:0016458	gene silencing	24/1188	248/23239	0.0021119	0.0273582	0.0231568	Ppp1r8/Ncbp1/Clp1/Ubtf/Ago2/Bend3/Eif4g1/Pabpc1/Cnot8/Sirt1/Ajuba/Hdac1/Atad2b/Dot1l/Srcap/Cnot1/Atad2/Hira/Drosha/Suv39h1/Smchd1/Map2k2/Rif1/Cnot10	24
GO:0043254	GO:0043254	regulation of protein complex assembly	37/1188	440/23239	0.00216386	0.0279562	0.023663	Dhx33/Dr1/Apc/Jmy/Eif4g1/Setx/Prkcd/Lamp2/Rps3/Ulk1/Kank4/Ep300/Ppm1a/Ajuba/Mkks/Ddx3x/Ptpn11/Arfgef1/Cptp/Wipf2/Usp50/Cnot1/Fkbp4/Nav3/Fhod3/Cttn/Map3k7/Arf6/Med25/Myo1c/Hdac6/Raf1/Vcp/Hcfc1/Gsk3b/Nckap1/Cand1	37
GO:0002183	GO:0002183	cytoplasmic translational initiation	5/1188	19/23239	0.00220619	0.0283027	0.0239562	Rps2/Denr/Ythdf2/Eif5/Eif4h	5
GO:0043094	GO:0043094	cellular metabolic compound salvage	5/1188	19/23239	0.00220619	0.0283027	0.0239562	Pdxk/Uck2/Adi1/Bhmt2/Aprt	5
GO:0009152	GO:0009152	purine ribonucleotide biosynthetic process	21/1188	207/23239	0.0022083	0.0283027	0.0239562	Dhtkd1/Tigar/Pank3/Adsl/Prps1/Impdh2/Impdh1/Paics/Gart/Mpc2/Uqcc3/Nme2/Atp5j/Pgam1/Ppcs/Mtch2/Aprt/Atp5g1/Mpc1/Vcp/Atp5f1	21
GO:0046777	GO:0046777	protein autophosphorylation	23/1188	235/23239	0.0022367	0.0285905	0.0241999	Pim3/Prkcd/Wnk1/Ulk1/Trpm7/Mark3/Mapk14/Ddr2/Chek2/Nme2/Mapkapk5/Pak2/Smg1/Gsk3b/Jak2/Map2k2/Ppp2r5e/Chp1/Mark2/Eif2ak3/Nek2/Cdk12/Taok1	23
GO:0007091	GO:0007091	metaphase/anaphase transition of mitotic cell cycle	9/1188	57/23239	0.00227042	0.0287926	0.0243709	Mad2l1bp/Apc/Cul3/Tpr/Dync1li1/Khdc3/Rad21/Cep192/Trip13	9
GO:0019080	GO:0019080	viral gene expression	9/1188	57/23239	0.00227042	0.0287926	0.0243709	Zfp639/Ep300/Hdac1/Rest/Ptbp1/Eif3b/Eif3f/Denr/Chd1	9
GO:1903902	GO:1903902	positive regulation of viral life cycle	9/1188	57/23239	0.00227042	0.0287926	0.0243709	P4hb/Pabpc1/Ddb1/Larp1/Ddx3x/Pde12/Hacd3/Ppia/Pkn2	9
GO:0061136	GO:0061136	regulation of proteasomal protein catabolic process	18/1188	167/23239	0.00229054	0.0289714	0.0245223	Bag5/Arih2/Plk3/Gpx1/Trib3/Ubxn1/Wac/Smad7/Csnk1a1/Tlk2/Gabarapl2/Smarcc1/Nub1/Vcp/Gsk3b/Rpl11/Zfand2a/Dda1	18
GO:0070507	GO:0070507	regulation of microtubule cytoskeleton organization	20/1188	194/23239	0.00230069	0.0290236	0.0245665	Apc/Tpr/Stmn3/Rps3/Dync1li1/Kat2b/Fkbp4/Ska1/Kat2a/Nav3/Hdac6/Cep192/Ska3/Stag2/Xpo1/Gsk3b/Mark2/Nek2/Taok1/Rock2	20
GO:0007094	GO:0007094	mitotic spindle assembly checkpoint	7/1188	37/23239	0.00239556	0.0296464	0.0250936	Mad2l1bp/Apc/Tpr/Dync1li1/Khdc3/Cep192/Trip13	7
GO:0071173	GO:0071173	spindle assembly checkpoint	7/1188	37/23239	0.00239556	0.0296464	0.0250936	Mad2l1bp/Apc/Tpr/Dync1li1/Khdc3/Cep192/Trip13	7
GO:1905209	GO:1905209	positive regulation of cardiocyte differentiation	7/1188	37/23239	0.00239556	0.0296464	0.0250936	Pin1/Parp2/Ep300/Sirt1/Kat2a/Efnb2/Gsk3b	7
GO:0000083	GO:0000083	regulation of transcription involved in G1/S transition of mitotic cell cycle	4/1188	12/23239	0.00241673	0.0296464	0.0250936	Npat/Zpr1/E2f1/Bach1	4
GO:0000491	GO:0000491	small nucleolar ribonucleoprotein complex assembly	4/1188	12/23239	0.00241673	0.0296464	0.0250936	Znhit3/Ruvbl1/Nufip1/Znhit6	4
GO:0006098	GO:0006098	pentose-phosphate shunt	4/1188	12/23239	0.00241673	0.0296464	0.0250936	Rpia/Tigar/Pgam1/Pgd	4
GO:0019471	GO:0019471	4-hydroxyproline metabolic process	4/1188	12/23239	0.00241673	0.0296464	0.0250936	Prdx4/P4hb/Ero1l/Egln2	4
GO:0060211	GO:0060211	regulation of nuclear-transcribed mRNA poly(A) tail shortening	4/1188	12/23239	0.00241673	0.0296464	0.0250936	Ago2/Pabpc1/Cnot1/Tob1	4
GO:0060213	GO:0060213	positive regulation of nuclear-transcribed mRNA poly(A) tail shortening	4/1188	12/23239	0.00241673	0.0296464	0.0250936	Ago2/Pabpc1/Cnot1/Tob1	4
GO:1900112	GO:1900112	regulation of histone H3-K9 trimethylation	4/1188	12/23239	0.00241673	0.0296464	0.0250936	Kdm4c/Sirt1/Atrx/Suv39h1	4
GO:0030865	GO:0030865	cortical cytoskeleton organization	8/1188	47/23239	0.00241773	0.0296464	0.0250936	Rock1/Strip1/Wipf2/Llgl2/Arf6/Racgap1/Nckap1/Rock2	8
GO:0045814	GO:0045814	negative regulation of gene expression, epigenetic	11/1188	80/23239	0.00244452	0.0298989	0.0253073	Ubtf/Bend3/Sirt1/Hdac1/Atad2b/Dot1l/Atad2/Hira/Suv39h1/Smchd1/Rif1	11
GO:0007033	GO:0007033	vacuole organization	17/1188	155/23239	0.00248814	0.0303553	0.0256937	Rab20/Map1lc3b/Wipi2/Hexb/Wdr45b/Rab39/Ulk1/Rab1a/Pip4k2c/Rb1cc1/Map1lc3a/Wdr45/Gabarapl2/Atg13/Phf23/Atg9a/Tmem41b	17
GO:1902175	GO:1902175	regulation of oxidative stress-induced intrinsic apoptotic signaling pathway	6/1188	28/23239	0.00251678	0.0306272	0.0259238	Bag5/Gpx1/P4hb/Sod2/Sirt1/Mcl1	6
GO:0033047	GO:0033047	regulation of mitotic sister chromatid segregation	10/1188	69/23239	0.00255642	0.0309533	0.0261998	Mad2l1bp/Apc/Cul3/Tpr/Dync1li1/Khdc3/Rad21/Atrx/Cep192/Trip13	10
GO:1901796	GO:1901796	regulation of signal transduction by p53 class mediator	10/1188	69/23239	0.00255642	0.0309533	0.0261998	Pttg1ip/Prmt6/Nop2/Sirt1/Snai1/Bop1/Rps7/Rpl23/Rrs1/Rpl11	10
GO:0010965	GO:0010965	regulation of mitotic sister chromatid separation	9/1188	58/23239	0.00256786	0.0310138	0.026251	Mad2l1bp/Apc/Cul3/Tpr/Dync1li1/Khdc3/Rad21/Cep192/Trip13	9
GO:0048024	GO:0048024	regulation of mRNA splicing, via spliceosome	13/1188	105/23239	0.0026972	0.0324945	0.0275043	Rbm5/Ncbp1/Srsf1/Srsf6/Rest/Rbm8a2/Ptbp1/Rbm8a/C1qbp/Tra2a/Eif4a3/Celf1/Rbm15	13
GO:0042594	GO:0042594	response to starvation	17/1188	157/23239	0.00284768	0.0341368	0.0288944	Glul/Map1lc3b/Lamp2/Slc39a4/Ulk1/Tbl2/Larp1/Sirt1/Eif2a/Map1lc3a/Mybbp1a/Sesn2/Atf4/Gabarapl2/Depdc5/Eif2ak3/Usp33	17
GO:0045333	GO:0045333	cellular respiration	17/1188	157/23239	0.00284768	0.0341368	0.0288944	Dhtkd1/Adsl/Nfatc3/Cdk1/Mdh2/Sod2/Noa1/Uqcrfs1/Uqcrc1/Tbrg4/Uqcc3/Bnip3/Mtch2/Mybbp1a/Vcp/Prelid1/Pik3ca	17
GO:0006732	GO:0006732	coenzyme metabolic process	28/1188	312/23239	0.00288195	0.0344619	0.0291696	Dhtkd1/Pdxk/Rpia/Shmt1/Tigar/Pank3/Folr1/Mthfr/Pemt/Coq4/Mdh2/Lias/Nmnat1/Gpd1l/Ldha/Gart/Mpc2/Crot/Bhmt2/Pgam1/Ppcs/Pgd/Mtch2/Gpat4/Prdx5/Mpc1/Gpd2/Vcp	28
GO:0060324	GO:0060324	face development	9/1188	59/23239	0.00289533	0.0345361	0.0292324	Cdk2ap1/Csrnp1/Rarg/Mkks/Ptpn11/Chd7/Raf1/Kat6a/Map2k2	9
GO:0070536	GO:0070536	protein K63-linked deubiquitination	6/1188	29/23239	0.00303801	0.0360595	0.0305218	Spata2/Usp50/Otud4/Usp16/Vcp/Usp33	6
GO:0097352	GO:0097352	autophagosome maturation	6/1188	29/23239	0.00303801	0.0360595	0.0305218	Map1lc3b/Lamp2/Fyco1/Map1lc3a/Vcp/Phf23	6
GO:0043401	GO:0043401	steroid hormone mediated signaling pathway	14/1188	119/23239	0.00304772	0.0360859	0.0305442	Kdm3a/Ubr5/Med13/Ep300/Strn3/Sirt1/Hdac1/Med14/Rwdd1/Cnot1/Fkbp4/Rnf6/Klf9/Jak2	14
GO:2000059	GO:2000059	negative regulation of ubiquitin-dependent protein catabolic process	8/1188	49/23239	0.00316902	0.0374301	0.031682	Bag5/Ubxn1/Wac/Rps7/Rpl23/Tlk2/Smarcc1/Rpl11	8
GO:0019079	GO:0019079	viral genome replication	13/1188	107/23239	0.00318699	0.0375504	0.0317838	Rab5a/Pabpc1/Ddb1/Larp1/Zc3hav1/Ddx3x/Pde12/Eea1/Hacd3/Ppia/Vcp/Pkn2/Rock2	13
GO:0044784	GO:0044784	metaphase/anaphase transition of cell cycle	9/1188	60/23239	0.0032549	0.0381607	0.0323003	Mad2l1bp/Apc/Cul3/Tpr/Dync1li1/Khdc3/Rad21/Cep192/Trip13	9
GO:0090307	GO:0090307	mitotic spindle assembly	9/1188	60/23239	0.0032549	0.0381607	0.0323003	Tpr/Tubgcp6/Cdc14b/Chek2/Khdc3/Racgap1/Cep192/Stag2/Nek2	9
GO:0045005	GO:0045005	DNA-dependent DNA replication maintenance of fidelity	7/1188	39/23239	0.00327496	0.0381607	0.0323003	Cdk9/Brca2/Fancm/Rfwd3/Mms22l/Atrx/Dna2	7
GO:0071174	GO:0071174	mitotic spindle checkpoint	7/1188	39/23239	0.00327496	0.0381607	0.0323003	Mad2l1bp/Apc/Tpr/Dync1li1/Khdc3/Cep192/Trip13	7
GO:0033045	GO:0033045	regulation of sister chromatid segregation	11/1188	83/23239	0.00327838	0.0381607	0.0323003	Mad2l1bp/Apc/Cul3/Tpr/Wapl/Dync1li1/Khdc3/Rad21/Atrx/Cep192/Trip13	11
GO:0006544	GO:0006544	glycine metabolic process	4/1188	13/23239	0.00335056	0.0385354	0.0326176	Gcsh/Shmt1/Gldc/Gart	4
GO:0006596	GO:0006596	polyamine biosynthetic process	4/1188	13/23239	0.00335056	0.0385354	0.0326176	Odc1/Oaz1/Azin1/Amd2	4
GO:0070933	GO:0070933	histone H4 deacetylation	4/1188	13/23239	0.00335056	0.0385354	0.0326176	Gm10093/Hdac1/Rest/Rcor1	4
GO:0090085	GO:0090085	regulation of protein deubiquitination	4/1188	13/23239	0.00335056	0.0385354	0.0326176	Ubxn1/Otud4/Tnip1/Vcp	4
GO:1904816	GO:1904816	positive regulation of protein localization to chromosome, telomeric region	4/1188	13/23239	0.00335056	0.0385354	0.0326176	Wrap53/Gnl3l/Tcp1/Gnl3	4
GO:0034620	GO:0034620	cellular response to unfolded protein	10/1188	72/23239	0.00351308	0.0402758	0.0340906	Serp1/Ppp1r15a/Tbl2/Ep300/Ero1l/Atf4/Pik3r1/Ficd/Eif2ak3/Ptpn1	10
GO:0034599	GO:0034599	cellular response to oxidative stress	24/1188	258/23239	0.00352526	0.0402758	0.0340906	Bag5/Rnf7/Gpx1/Zfp622/P4hb/Setx/Prkcd/Rps3/Traf2/Sod2/Sirt1/Hdac1/Rwdd1/Mcl1/Bnip3/Sesn2/Atf4/Prdx5/Cpeb2/Hdac6/Adprhl2/Chuk/Jak2/Ddias	24
GO:0000466	GO:0000466	maturation of 5.8S rRNA from tricistronic rRNA transcript (SSU-rRNA, 5.8S rRNA, LSU-rRNA)	5/1188	21/23239	0.00354611	0.0402758	0.0340906	Rps21/Rpsa/Bop1/Nol9/Rrs1	5
GO:0006379	GO:0006379	mRNA cleavage	5/1188	21/23239	0.00354611	0.0402758	0.0340906	Ncbp1/Ago2/Cstf2t/Znrd1/Cpsf6	5
GO:2000209	GO:2000209	regulation of anoikis	5/1188	21/23239	0.00354611	0.0402758	0.0340906	Chek2/Ankrd13c/Mcl1/Mybbp1a/Pik3ca	5
GO:0031497	GO:0031497	chromatin assembly	14/1188	121/23239	0.00355202	0.0402758	0.0340906	Set/Brd2/Tpr/Noc2l/Cdan1/Atrx/Hira/Ubn1/Nap1l1/Cabin1/Ctcf/Smchd1/Kat6a/Ipo4	14
GO:0035148	GO:0035148	tube formation	18/1188	174/23239	0.00357543	0.040446	0.0342347	Folr1/Mthfr/Setd2/Lias/Brpf1/Ovol2/Rarg/Kat2a/Rps7/Map3k7/Apaf1/Luzp1/Cecr2/Nckap1/Ipmk/Tulp3/Hectd1/Rock2	18
GO:0035329	GO:0035329	hippo signaling	6/1188	30/23239	0.00363574	0.0409361	0.0346495	Mob1a/Ajuba/Nf2/Mark3/Wwc2/Wwtr1	6
GO:0071108	GO:0071108	protein K48-linked deubiquitination	6/1188	30/23239	0.00363574	0.0409361	0.0346495	Ubxn1/Usp37/Usp50/Otud4/Usp34/Usp33	6
GO:0090398	GO:0090398	cellular senescence	9/1188	61/23239	0.00364869	0.0409861	0.0346919	Smc6/Prkcd/Prmt6/Tbx3/Sirt1/Mapk14/Mapkapk5/Suv39h1/Kat6a	9
GO:0001843	GO:0001843	neural tube closure	13/1188	109/23239	0.00374681	0.0419904	0.035542	Folr1/Mthfr/Setd2/Lias/Rarg/Kat2a/Rps7/Apaf1/Cecr2/Nckap1/Tulp3/Hectd1/Rock2	13
GO:0001835	GO:0001835	blastocyst hatching	7/1188	40/23239	0.0037976	0.0422648	0.0357742	Crxos/Pemt/Stmn3/Slc35e2/Rbbp8/Suv39h1/Hcfc1	7
GO:0035188	GO:0035188	hatching	7/1188	40/23239	0.0037976	0.0422648	0.0357742	Crxos/Pemt/Stmn3/Slc35e2/Rbbp8/Suv39h1/Hcfc1	7
GO:0071684	GO:0071684	organism emergence from protective structure	7/1188	40/23239	0.0037976	0.0422648	0.0357742	Crxos/Pemt/Stmn3/Slc35e2/Rbbp8/Suv39h1/Hcfc1	7
GO:0010921	GO:0010921	regulation of phosphatase activity	14/1188	122/23239	0.00382857	0.0425112	0.0359828	Ppp1r15b/Ppp1r2/Rock1/Ppp1r15a/Wnk1/Sfi1/Csrnp3/Tiprl/Gnai2/Cep192/Ppp1r12a/Jak2/Chp1/Rock2	14
GO:0031123	GO:0031123	RNA 3'-end processing	12/1188	97/23239	0.00389	0.043094	0.0364761	Cdk9/Ncbp1/Clp1/Cstf2t/Rps21/Fbl/Rpsa/Cpsf6/Zc3h14/Rnf20/Ssu72/Trmt10c	12
GO:0015980	GO:0015980	energy derivation by oxidation of organic compounds	23/1188	246/23239	0.0039708	0.0438883	0.0371484	Dhtkd1/Tigar/Adsl/Nfatc3/Ppp1r2/Stk40/Cdk1/Mdh2/Sod2/Noa1/Uqcrfs1/Uqcrc1/Ldha/Tbrg4/Rb1cc1/Uqcc3/Bnip3/Mtch2/Mybbp1a/Vcp/Gsk3b/Prelid1/Pik3ca	23
GO:1904951	GO:1904951	positive regulation of establishment of protein localization	36/1188	441/23239	0.0039963	0.044069	0.0373014	Glul/Serp1/Tpr/Ubr5/Plk3/Ttn/Cdk1/Prkcd/Ep300/Prkcq/C2cd2l/Ppm1a/Wrap53/Ipo5/Sirt1/Oaz1/Mapk14/Ptbp1/Usp50/Mpc2/Dynll1/Sec16a/Ppia/Zpr1/Myo1c/Hnrnpm/Pik3r1/Sec24a/Chuk/Arid5a/Gsk3b/Jak2/Chp1/Ifnar1/Kif5b/Tcp1	36
GO:0050792	GO:0050792	regulation of viral process	18/1188	176/23239	0.0040365	0.0444107	0.0375905	P4hb/Pabpc1/Zfp639/Ep300/Ddb1/Larp1/Crebbp/Zc3hav1/Ddx3x/Hdac1/Rest/Pde12/Hacd3/Ppia/Snf8/Snx3/Chd1/Pkn2	18
GO:0060606	GO:0060606	tube closure	13/1188	110/23239	0.00405516	0.0445144	0.0376784	Folr1/Mthfr/Setd2/Lias/Rarg/Kat2a/Rps7/Apaf1/Cecr2/Nckap1/Tulp3/Hectd1/Rock2	13
GO:0051306	GO:0051306	mitotic sister chromatid separation	9/1188	62/23239	0.00407886	0.0446728	0.0378124	Mad2l1bp/Apc/Cul3/Tpr/Dync1li1/Khdc3/Rad21/Cep192/Trip13	9
GO:0032648	GO:0032648	regulation of interferon-beta production	8/1188	51/23239	0.00409009	0.0446942	0.0378305	Yy1/Crebbp/Zc3hav1/Ptpn11/Rnf216/Polr3g/Ifnar1/Atg9a	8
GO:0000380	GO:0000380	alternative mRNA splicing, via spliceosome	10/1188	74/23239	0.0042948	0.046825	0.0396341	Rbm5/Srsf1/Srsf6/Rest/Rbm8a2/Ptbp1/Rbm8a/Hnrnpm/Celf1/Rbm15	10
GO:0034629	GO:0034629	cellular protein-containing complex localization	6/1188	31/23239	0.0043165	0.0469203	0.0397148	Exoc3l2/Exoc8/Klhl21/Smad7/Nacc2/Ran	6
GO:0001666	GO:0001666	response to hypoxia	20/1188	205/23239	0.00433275	0.0469203	0.0397148	Tigar/Vhl/Nfatc3/Plk3/P4hb/Tbl2/Fundc1/Ep300/Pten/Sirt1/Ajuba/Rest/Bnip3/Cpeb2/Raf1/Suv39h1/Chchd2/Nf1/Egln2/Bach1	20
GO:0032984	GO:0032984	protein-containing complex disassembly	20/1188	205/23239	0.00433275	0.0469203	0.0397148	Map1lc3b/Apc/Sh3bp1/Etf1/Stmn3/Setx/Lamp2/Arid2/Fyco1/Map1lc3a/Nav3/Bnip3/Denr/Rpl23/Hdac6/Smarcc1/Vcp/Phf23/Kif5b/Taok1	20
GO:0031577	GO:0031577	spindle checkpoint	7/1188	41/23239	0.00438118	0.0471027	0.0398691	Mad2l1bp/Apc/Tpr/Dync1li1/Khdc3/Cep192/Trip13	7
GO:0046825	GO:0046825	regulation of protein export from nucleus	7/1188	41/23239	0.00438118	0.0471027	0.0398691	Tpr/Rangap1/Setd2/Ppm1a/Ptpn11/Xpo1/Gsk3b	7
GO:0008033	GO:0008033	tRNA processing	13/1188	111/23239	0.00438369	0.0471027	0.0398691	Trub2/Clp1/Mettl2/Gtpbp3/Grsf1/Tsen34/Qtrt1/Elp6/Tprkb/Rpp14/Aars/Rpp40/Trmt10c	13
GO:0000413	GO:0000413	protein peptidyl-prolyl isomerization	5/1188	22/23239	0.00439847	0.0471027	0.0398691	Ppil1/Nktr/Ranbp2/Fkbp4/Ppia	5
GO:1900078	GO:1900078	positive regulation of cellular response to insulin stimulus	5/1188	22/23239	0.00439847	0.0471027	0.0398691	Adipor1/Sirt1/Ptpn11/Myo1c/Gnai2	5
GO:0019081	GO:0019081	viral translation	4/1188	14/23239	0.00450266	0.0481116	0.0407231	Ptbp1/Eif3b/Eif3f/Denr	4
GO:0000381	GO:0000381	regulation of alternative mRNA splicing, via spliceosome	9/1188	63/23239	0.00454764	0.048165	0.0407683	Rbm5/Srsf1/Srsf6/Rest/Rbm8a2/Ptbp1/Rbm8a/Celf1/Rbm15	9
GO:0006278	GO:0006278	RNA-dependent DNA biosynthetic process	9/1188	63/23239	0.00454764	0.048165	0.0407683	Smg5/Nhp2/Prkcq/Wrap53/Gnl3l/Hmbox1/Mapkapk5/Nek2/Tcp1	9
GO:0007004	GO:0007004	telomere maintenance via telomerase	9/1188	63/23239	0.00454764	0.048165	0.0407683	Smg5/Nhp2/Prkcq/Wrap53/Gnl3l/Hmbox1/Mapkapk5/Nek2/Tcp1	9
GO:0045454	GO:0045454	cell redox homeostasis	9/1188	63/23239	0.00454764	0.048165	0.0407683	Krit1/Prdx4/Gpx1/P4hb/Glrx2/Ero1l/Prdx5/Txndc15/Egln2	9
GO:0031032	GO:0031032	actomyosin structure organization	19/1188	192/23239	0.00458031	0.0484047	0.0409712	Cul3/Rock1/Ttn/Itgb5/Kank4/Ep300/Prkcq/Alms1/Mkks/Trpm7/Mef2a/Nf2/Ppfia1/Fhod3/Cdc42bpb/Alkbh4/Racgap1/Pik3r1/Rock2	19
GO:0071478	GO:0071478	cellular response to radiation	16/1188	151/23239	0.00461079	0.0484172	0.0409818	Yy1/Noc2l/Ep300/Ddb1/Sirt1/Crebbp/Mapk14/Chek2/Mtch2/Tlk2/Ei24/Usp47/Pik3r1/Rad51ap1/Ercc4/Ddias	16
GO:0072524	GO:0072524	pyridine-containing compound metabolic process	16/1188	151/23239	0.00461079	0.0484172	0.0409818	Dhtkd1/Pdxk/Rpia/Tigar/Mdh2/Nmnat1/Gpd1l/Ldha/Mpc2/Pgam1/Pgd/Mtch2/Prdx5/Mpc1/Gpd2/Vcp	16
GO:0032386	GO:0032386	regulation of intracellular transport	36/1188	445/23239	0.00461254	0.0484172	0.0409818	Rab5a/Tpr/Rangap1/Ubr5/Plk3/Setd2/Cdk1/Ppp1cc/Prkcd/Ep300/Prkcq/Ppm1a/Ipo5/Sirt1/Oaz1/Ptpn11/Cpsf6/Mapk14/Sec16a/Arhgap1/Zpr1/Myo1c/Ei24/Pik3r1/Snx3/Ppp1r12a/Xpo1/Gsk3b/Nf1/Gcc2/Rhot1/Jak2/Map2k2/Chp1/Kif5b/Ptpn1	36
GO:0000726	GO:0000726	non-recombinational repair	8/1188	52/23239	0.00462169	0.0484172	0.0409818	Polq/Wrap53/Dclre1b/Rbbp8/Smchd1/Dek/Ercc4/Rif1	8
GO:0009267	GO:0009267	cellular response to starvation	15/1188	138/23239	0.00471714	0.0493099	0.0417374	Glul/Map1lc3b/Lamp2/Slc39a4/Ulk1/Tbl2/Sirt1/Map1lc3a/Mybbp1a/Sesn2/Atf4/Gabarapl2/Depdc5/Eif2ak3/Usp33	15
GO:0010508	GO:0010508	positive regulation of autophagy	13/1188	112/23239	0.00473333	0.0493721	0.04179	Rock1/Plk3/Ulk1/Wac/Larp1/Sirt1/Pip4k2c/Fyco1/Bnip3/Map3k7/Sesn2/Hdac6/Gsk3b	13
GO:0010212	GO:0010212	response to ionizing radiation	14/1188	125/23239	0.00476488	0.049487	0.0418873	Tigar/Brca2/Gpx1/Brat1/Rfwd3/Sod2/Sirt1/Mapk14/Chek2/Tlk2/Nabp1/Rad51ap1/Ints3/Ddias	14
GO:0042177	GO:0042177	negative regulation of protein catabolic process	14/1188	125/23239	0.00476488	0.049487	0.0418873	Bag5/Ctsa/Pin1/Ubxn1/Wac/Rps7/Rpl23/Tlk2/Azin1/Gabarapl2/Smarcc1/Snx3/Mycbp2/Rpl11	14

## Sheet: Zygote_2-cell_Up_MF
	ID	Description	GeneRatio	BgRatio	pvalue	p.adjust	qvalue	geneID	Count
GO:0003735	GO:0003735	structural constituent of ribosome	59/1171	180/22744	1.06947e-31	9.09049e-29	7.29491e-29	Rpl23a/Rpl9/Rplp1/Rps17/Rpl41/Rps19/Rps6/Rps23/Rpl18/Rpl6/Rps2/Rpl13/Rpl24/Rps26/Rps24/Rplp2/Rpl10l/Rps13/Rps3a1/Rps21/Rps9/Rps3/Mrpl51/Rps25/Rps15/Mrpl43/Rpl12/Rpsa/Rps20/Rsl24d1/Mrpl49/Rpl39/Gm2000/Mrpl20/Rpl37a/Rpl37/Rps8/Rpl8/Rplp0/Rps7/Mrps30/Mrpl34/Rpl23/Rpl35/Rpl19/Rpl10a/Mrps7/Rpl30/Rpl21/Rps5/Rpl18a/Rps29/Rps4x/Rpl35a/Rpl11/Rpl27a/Rpl15/Rpl10/Rps14	59
GO:0003729	GO:0003729	mRNA binding	54/1171	256/22744	4.24006e-19	1.80203e-16	1.44608e-16	Dhx33/Shmt1/Ppp1r8/Rps6/Rbm5/Ncbp1/Rpl6/Rps2/Ago2/Srsf1/Eif4g2/Rps26/Tpr/Etf1/Rps13/Eif4g1/Cstf2t/Rps3a1/Pabpc1/G3bp1/Rps3/Larp1/Pabpc4/Ddx3x/Cpsf6/Purb/Rbm8a2/Hnrnpa0/Ptbp1/Rbm8a/Utp23/C1qbp/Denr/Rps7/Dppa5a/Rpl35/Angel2/Mrps7/Rpl30/Rps5/Cpeb2/Hnrnpm/Eif4a3/Qk/Fxr2/Rnf20/Celf1/Rc3h1/Rbm15/Ybx1/Hnrnpr/Gnl3/Rps14/Sf3b1	54
GO:0019843	GO:0019843	rRNA binding	23/1171	75/22744	1.71955e-12	4.74388e-10	3.80685e-10	Rpl23a/Rpl9/Rpl6/Imp3/Rps13/Rps9/Rps3/Rpl12/Mrpl20/Utp23/Rpl37a/Rpl37/Rpl8/Rplp0/Rpl23/Rpl19/Mrps7/Rrs1/Rps5/Emg1/Rps4x/Rpl11/Rps14	23
GO:0003712	GO:0003712	transcription coregulator activity	62/1171	454/22744	2.23241e-12	4.74388e-10	3.80685e-10	Hipk1/Dr1/Psmc3ip/Wdr77/C1d/Mta2/Jmy/Zfp281/Kmt2c/Noc2l/Ruvbl1/Trib3/Casp8ap2/Med13/Ddx54/Ep300/Cited1/Rcor2/Jade1/Mier3/Atxn7l3/Gmeb2/Rarg/Sirt1/Tob2/Ajuba/Crebbp/Mef2a/Hipk3/Hdac1/Med14/Kat2b/Taf5l/Pprc1/Maml1/Kat2a/C1qbp/Edf1/Npat/Arl2bp/Dcc/Tfb2m/Ube2l3/Tob1/Med26/Hira/Usp22/Mybbp1a/Kdm5a/Med13l/Kdm5b/Wwtr1/Ncoa1/Usp16/Rbbp8/Hcfc1/Arid5a/Rnf20/Kat6a/Rad54l2/Cbfa2t2/Ncoa6	62
GO:0031369	GO:0031369	translation initiation factor binding	15/1171	37/22744	1.39235e-10	2.367e-08	1.89946e-08	Rps19/Rps24/Eif4g1/Rps3a1/Tbl2/Larp1/Ddx3x/Eif3b/Eif3c/Eif3f/Zpr1/Eif5/Celf1/Eif2ak3/Eif2b4	15
GO:0019787	GO:0019787	ubiquitin-like protein transferase activity	53/1171	412/22744	8.1251e-10	1.15106e-07	9.23696e-08	Rbbp6/Rnf11/Gid4/Mkrn1/Fbxo15/Rnf7/Ube2o/Fbxo6/Vhl/Arih2/Pias3/Fbxo45/Cul3/G2e3/Ubr5/Herc2/Wsb1/Rmnd5b/Ube2j2/Ube2z/Fbxw9/Traf2/Rfwd3/Klhl21/Tmem129/Rnf216/Ranbp2/Fbxw2/Ube2c/Huwe1/Cbl/Zyg11b/Herc4/Ube4b/Fbxw11/Rnf125/Cdc34b/Ube2l3/Traf7/Ubr3/Rnf6/Ube3c/Dzip3/Mycbp2/Fem1b/Ube2e3/Ube2v1/Rnf20/Rc3h1/Ttc3/Fbxo11/Hectd1/Msl2	53
GO:0004842	GO:0004842	ubiquitin-protein transferase activity	51/1171	392/22744	1.14324e-09	1.38822e-07	1.11402e-07	Rbbp6/Rnf11/Gid4/Mkrn1/Fbxo15/Rnf7/Ube2o/Fbxo6/Vhl/Arih2/Fbxo45/Cul3/G2e3/Ubr5/Herc2/Wsb1/Rmnd5b/Ube2j2/Ube2z/Fbxw9/Traf2/Rfwd3/Klhl21/Tmem129/Rnf216/Fbxw2/Ube2c/Huwe1/Cbl/Zyg11b/Herc4/Ube4b/Fbxw11/Rnf125/Cdc34b/Ube2l3/Traf7/Ubr3/Rnf6/Ube3c/Dzip3/Mycbp2/Fem1b/Ube2e3/Ube2v1/Rnf20/Rc3h1/Ttc3/Fbxo11/Hectd1/Msl2	51
GO:0061733	GO:0061733	peptide-lysine-N-acetyltransferase activity	18/1171	65/22744	2.82344e-09	2.9999e-07	2.40735e-07	Brca2/Brpf1/Ep300/Kansl1/Mcrs1/Crebbp/Kat2b/Kansl3/Esco1/Taf5l/Kat2a/Dpf2/Usp22/Ncoa1/Epc2/Hcfc1/Kat6a/Kansl2	18
GO:0004402	GO:0004402	histone acetyltransferase activity	17/1171	63/22744	1.19493e-08	1.12855e-06	9.05634e-07	Brca2/Brpf1/Ep300/Kansl1/Mcrs1/Crebbp/Kat2b/Kansl3/Taf5l/Kat2a/Dpf2/Usp22/Ncoa1/Epc2/Hcfc1/Kat6a/Kansl2	17
GO:0034212	GO:0034212	peptide N-acetyltransferase activity	18/1171	74/22744	2.6512e-08	2.25352e-06	1.8084e-06	Brca2/Brpf1/Ep300/Kansl1/Mcrs1/Crebbp/Kat2b/Kansl3/Esco1/Taf5l/Kat2a/Dpf2/Usp22/Ncoa1/Epc2/Hcfc1/Kat6a/Kansl2	18
GO:0003713	GO:0003713	transcription coactivator activity	36/1171	262/22744	7.93169e-08	6.12903e-06	4.91841e-06	Dr1/Psmc3ip/Wdr77/Mta2/Jmy/Kmt2c/Ruvbl1/Med13/Ep300/Cited1/Jade1/Atxn7l3/Gmeb2/Rarg/Crebbp/Mef2a/Med14/Kat2b/Taf5l/Pprc1/Maml1/Kat2a/Edf1/Npat/Arl2bp/Dcc/Ube2l3/Usp22/Kdm5a/Wwtr1/Ncoa1/Usp16/Hcfc1/Rnf20/Kat6a/Ncoa6	36
GO:0008080	GO:0008080	N-acetyltransferase activity	19/1171	92/22744	1.82804e-07	1.29486e-05	1.03909e-05	Brca2/Brpf1/Ep300/Kansl1/Mcrs1/Crebbp/Kat2b/Kansl3/Esco1/Taf5l/Kat2a/Dpf2/Usp22/Ncoa1/Epc2/Sat1/Hcfc1/Kat6a/Kansl2	19
GO:0003743	GO:0003743	translation initiation factor activity	13/1171	47/22744	4.5696e-07	2.8797e-05	2.3109e-05	Eif4g2/Eif4g1/Eif1a/Eif2a/Eif3b/Eif3c/Eif3h/Eif3f/Denr/Eif5/Eif4h/Eif1/Eif2b4	13
GO:0004674	GO:0004674	protein serine/threonine kinase activity	50/1171	458/22744	4.74304e-07	2.8797e-05	2.3109e-05	Gm10668/Hipk1/Cdk9/Pim3/Gm5157/Stk40/Rock1/Cab39/Plk3/Ttn/Cdk1/Gm10662/Prkcd/Amhr2/Wnk1/Ulk1/Prkcq/Trpm7/Mark3/Hipk3/Mapk14/Cdk16/Chek2/Gm6882/Nme2/Mapkapk5/Pak2/Csnk1a1/Gm4565/Map3k7/Mknk2/Smg1/Cdc42bpb/Sbk1/Dbf4/Tlk2/Raf1/Ccnd3/Chuk/Gsk3b/Map2k2/Map2k3/Mark2/Eif2ak3/Nek2/Cdk12/Pkn2/Pik3ca/Taok1/Rock2	50
GO:0031267	GO:0031267	small GTPase binding	46/1171	417/22744	1.01312e-06	5.55515e-05	4.45788e-05	Sh3bp1/Rangap1/Rock1/Rilpl2/Slmap/Rbsn/Ulk1/Exoc8/Tbc1d12/Ipo5/Strn3/Als2/Xpot/Micall1/Dennd5b/Strip1/Rab11fip5/Evi5/Ranbp2/Tbc1d9/Xpo6/Sos1/Wdr44/Dennd5a/Pak2/Gga1/Llgl2/Arhgap1/Cdc42bpb/Tbc1d13/Rab11fip1/Myo1c/Raf1/Arhgef12/Lsm2/Dennd4c/Mycbp2/Xpo1/Diaph3/Nckap1/Ipo4/Ipo9/Sike1/Pkn2/Usp33/Rock2	46
GO:0010485	GO:0010485	H4 histone acetyltransferase activity	9/1171	23/22744	1.04568e-06	5.55515e-05	4.45788e-05	Brca2/Kansl1/Mcrs1/Kansl3/Kat2a/Usp22/Hcfc1/Kat6a/Kansl2	9
GO:0031625	GO:0031625	ubiquitin protein ligase binding	37/1171	304/22744	1.13187e-06	5.65934e-05	4.54149e-05	Bag5/Uba52/Gm5286/Gm9125/Map1lc3b/Smc6/Smg5/Apc/Cul3/Rangap1/Herc2/Trib3/Ube2j2/Rtn4/Wrap53/Ubxn1/Traf2/Pa2g4/Gm10696/Uqcrc1/Smad7/Tdpoz3/Chek2/Map1lc3a/Ubc/Bag1/Rpl23/Ube2l3/Casc3/Gabarapl2/Hdac6/Pik3r1/Vcp/Gsk3b/Rpl11/Rnf20/Tcp1	37
GO:0044389	GO:0044389	ubiquitin-like protein ligase binding	38/1171	320/22744	1.49597e-06	7.0643e-05	5.66893e-05	Bag5/Uba52/Gm5286/Gm9125/Map1lc3b/Smc6/Smg5/Apc/Cul3/Rangap1/Herc2/Trib3/Ube2j2/Rtn4/Wrap53/Ubxn1/Traf2/Pa2g4/Gm10696/Uqcrc1/Smad7/Tdpoz3/Chek2/Ube2c/Map1lc3a/Ubc/Bag1/Rpl23/Ube2l3/Casc3/Gabarapl2/Hdac6/Pik3r1/Vcp/Gsk3b/Rpl11/Rnf20/Tcp1	38
GO:0017016	GO:0017016	Ras GTPase binding	44/1171	401/22744	1.99563e-06	8.92781e-05	7.16436e-05	Sh3bp1/Rangap1/Rock1/Slmap/Rbsn/Ulk1/Exoc8/Tbc1d12/Ipo5/Strn3/Als2/Xpot/Micall1/Dennd5b/Strip1/Rab11fip5/Evi5/Ranbp2/Tbc1d9/Xpo6/Sos1/Wdr44/Dennd5a/Pak2/Llgl2/Arhgap1/Cdc42bpb/Tbc1d13/Rab11fip1/Myo1c/Raf1/Arhgef12/Lsm2/Dennd4c/Mycbp2/Xpo1/Diaph3/Nckap1/Ipo4/Ipo9/Sike1/Pkn2/Usp33/Rock2	44
GO:0042393	GO:0042393	histone binding	30/1171	227/22744	2.13554e-06	9.07606e-05	7.28332e-05	Ctsl/Brd2/Ptma/Kmt2c/Noc2l/Psme4/Prmt6/Wrap53/Kdm4c/L3mbtl2/Sirt1/Pwp1/Atad2b/Srcap/Brd1/Ncapd2/Atad2/Dpf2/Atrx/Ncapg2/Kdm5a/Kdm5b/Usp16/Chd1/Rnf20/Dek/Kat6a/Jak2/Baz1b/Ipo9	30
GO:0036459	GO:0036459	thiol-dependent ubiquitinyl hydrolase activity	18/1171	98/22744	2.32489e-06	9.30704e-05	7.46868e-05	Usp37/Usp50/Otud6b/Eif3f/Usp36/Usp22/Usp47/Otud4/Usp42/Usp38/Usp34/Usp16/Usp1/Usp24/Senp3/Usp29/Usp12/Usp33	18
GO:0019783	GO:0019783	ubiquitin-like protein-specific protease activity	19/1171	108/22744	2.41077e-06	9.30704e-05	7.46868e-05	Uspl1/Usp37/Usp50/Otud6b/Eif3f/Usp36/Usp22/Usp47/Otud4/Usp42/Usp38/Usp34/Usp16/Usp1/Usp24/Senp3/Usp29/Usp12/Usp33	19
GO:0004843	GO:0004843	thiol-dependent ubiquitin-specific protease activity	17/1171	89/22744	2.51838e-06	9.30704e-05	7.46868e-05	Usp37/Usp50/Eif3f/Usp36/Usp22/Usp47/Otud4/Usp42/Usp38/Usp34/Usp16/Usp1/Usp24/Senp3/Usp29/Usp12/Usp33	17
GO:0101005	GO:0101005	ubiquitinyl hydrolase activity	18/1171	99/22744	2.70637e-06	9.58507e-05	7.69179e-05	Usp37/Usp50/Otud6b/Eif3f/Usp36/Usp22/Usp47/Otud4/Usp42/Usp38/Usp34/Usp16/Usp1/Usp24/Senp3/Usp29/Usp12/Usp33	18
GO:0003714	GO:0003714	transcription corepressor activity	26/1171	185/22744	3.20393e-06	0.000108934	8.74168e-05	Hipk1/Dr1/C1d/Mta2/Zfp281/Noc2l/Trib3/Casp8ap2/Ddx54/Rcor2/Mier3/Sirt1/Tob2/Ajuba/Hipk3/Hdac1/C1qbp/Npat/Tob1/Hira/Mybbp1a/Kdm5b/Wwtr1/Rbbp8/Arid5a/Cbfa2t2	26
GO:0050321	GO:0050321	tau-protein kinase activity	8/1171	20/22744	3.4848e-06	0.000113926	9.14231e-05	Gm10668/Gm5157/Gm10662/Mark3/Gm6882/Gm4565/Gsk3b/Mark2	8
GO:0016410	GO:0016410	N-acyltransferase activity	19/1171	111/22744	3.67798e-06	0.000115788	9.29173e-05	Brca2/Brpf1/Ep300/Kansl1/Mcrs1/Crebbp/Kat2b/Kansl3/Esco1/Taf5l/Kat2a/Dpf2/Usp22/Ncoa1/Epc2/Sat1/Hcfc1/Kat6a/Kansl2	19
GO:0140098	GO:0140098	catalytic activity, acting on RNA	37/1171	322/22744	4.44106e-06	0.000134818	0.000108188	Dhx33/Ago2/Polr2l/Smg5/Mettl2/Fbl/Znrd1/Nop2/Cnot8/Ddx54/Polr2e/Tdp2/Ddx3x/Tsen34/Qtrt1/Isg20l2/Mars2/Iars/Rpap1/Pde12/Cnot1/Polr3e/Tfb2m/Polr3h/Drosha/Polr3g/Eif4a3/Rpp14/Polr2f/Dis3/Emg1/Aars/Crcp/Polr1e/Nob1/Rpp40/Trmt10c	37
GO:0016407	GO:0016407	acetyltransferase activity	19/1171	113/22744	4.82948e-06	0.000141554	0.000113594	Brca2/Brpf1/Ep300/Kansl1/Mcrs1/Crebbp/Kat2b/Kansl3/Esco1/Taf5l/Kat2a/Dpf2/Usp22/Ncoa1/Epc2/Sat1/Hcfc1/Kat6a/Kansl2	19
GO:0001094	GO:0001094	TFIID-class transcription factor complex binding	6/1171	11/22744	6.79456e-06	0.000192512	0.000154487	Ruvbl1/Fbl/Taf2/Edf1/Znhit6/Ercc4	6
GO:0008135	GO:0008135	translation factor activity, RNA binding	15/1171	78/22744	8.90047e-06	0.000244045	0.000195841	Eif4g2/Etf1/Eif4g1/Eif1a/Eif2a/Eif3b/Eif3c/Eif3h/Eif3f/Denr/Cpeb2/Eif5/Eif4h/Eif1/Eif2b4	15
GO:0003899	GO:0003899	DNA-directed 5'-3' RNA polymerase activity	10/1171	36/22744	9.37699e-06	0.000249076	0.000199878	Polr2l/Znrd1/Polr2e/Rpap1/Polr3e/Polr3h/Polr3g/Polr2f/Crcp/Polr1e	10
GO:0004197	GO:0004197	cysteine-type endopeptidase activity	17/1171	99/22744	1.1284e-05	0.000286799	0.00023015	Ctsl/Ctsc/Casp3/Ctsb/Usp37/Usp36/Usp47/Usp42/Usp38/Usp34/Usp16/Usp1/Usp24/Usp29/Espl1/Usp12/Usp33	17
GO:0008234	GO:0008234	cysteine-type peptidase activity	24/1171	175/22744	1.15329e-05	0.000286799	0.00023015	Ctsl/Ctsc/Uspl1/Casp3/Ctsb/Usp37/Usp50/Otud6b/Eif3f/Usp36/Usp22/Usp47/Otud4/Usp42/Usp38/Usp34/Usp16/Usp1/Usp24/Senp3/Usp29/Espl1/Usp12/Usp33	24
GO:0048027	GO:0048027	mRNA 5'-UTR binding	8/1171	23/22744	1.18094e-05	0.000286799	0.00023015	Shmt1/Rps13/Larp1/Ddx3x/Utp23/Rps7/Gnl3/Rps14	8
GO:0008047	GO:0008047	enzyme activator activity	45/1171	444/22744	1.23018e-05	0.00029046	0.000233087	Ctsc/Rplp1/Guca1a/Tor1aip2/Sh3bp1/Rangap1/Cab39/Casp3/Psme4/Arhgap5/Prkcd/Gm2a/Casp8ap2/Wnk1/Tbc1d12/Gm1527/Rgs11/Als2/Clpx/Arhgap8/Ddx3x/Evi5/Ranbp2/Tbc1d9/Tor1aip1/Pak2/Llgl2/Arhgap1/Arhgap29/Apaf1/Dbf4/Tbc1d13/Azin1/Racgap1/Raf1/Arhgef12/Agfg1/Vcp/Rasa2/Nf1/Map2k2/Depdc5/Ppp2r5e/Pik3ca/Taok1	45
GO:0008565	GO:0008565	protein transporter activity	14/1171	71/22744	1.30398e-05	0.000299564	0.000240393	Tomm20/Kpna1/Tnpo3/Tomm5/Tomm22/Ipo5/Sec61a2/Kpna6/Xpo6/Timm17b/Pgap2/Tomm40/Xpo1/Ipo9	14
GO:0034062	GO:0034062	5'-3' RNA polymerase activity	10/1171	38/22744	1.58741e-05	0.000345973	0.000277635	Polr2l/Znrd1/Polr2e/Rpap1/Polr3e/Polr3h/Polr3g/Polr2f/Crcp/Polr1e	10
GO:0097747	GO:0097747	RNA polymerase activity	10/1171	38/22744	1.58741e-05	0.000345973	0.000277635	Polr2l/Znrd1/Polr2e/Rpap1/Polr3e/Polr3h/Polr3g/Polr2f/Crcp/Polr1e	10
GO:0043021	GO:0043021	ribonucleoprotein complex binding	21/1171	145/22744	1.73138e-05	0.000367918	0.000295246	Dhx33/Snrpc/Rplp1/Smg5/Eif1a/Rpsa/Sec61a2/Ddx3x/Cpsf6/Eif2a/Snrpb/Eif3c/Bop1/C1qbp/Rpl35/Srpr/Cpeb2/Eif4a3/Rpl35a/Eif4h/Eif1	21
GO:0045182	GO:0045182	translation regulator activity	12/1171	55/22744	1.83806e-05	0.000381062	0.000305793	Shmt1/Rps9/Larp1/Purb/C1qbp/Cpeb2/Eif4a3/Fxr2/Aars/Rpl10/Eif2ak3/Rps14	12
GO:0019887	GO:0019887	protein kinase regulator activity	22/1171	159/22744	2.28898e-05	0.000463247	0.000371745	Rplp1/Apc/Ccna2/Cab39/Casp3/Trib3/Cdkn2d/Wnk1/Ccnjl/Als2/Ccne1/Ddx3x/Kat2b/Pak2/Tesc/Dbf4/Ccnd3/Atg13/Map2k2/Chp1/Pik3ca/Taok1	22
GO:0002039	GO:0002039	p53 binding	13/1171	69/22744	4.37626e-05	0.000865075	0.000694203	Pttg1ip/Noc2l/Plk3/Ep300/Gata1/Rfwd3/Sirt1/Crebbp/Hdac1/Mapkapk5/Gsk3b/Rnf20/Ybx1	13
GO:0019207	GO:0019207	kinase regulator activity	24/1171	190/22744	4.55521e-05	0.000879983	0.000706166	Rplp1/Socs3/Apc/Ccna2/Cab39/Casp3/Trib3/Cdkn2d/Wnk1/Ccnjl/Als2/Ccne1/Ddx3x/Kat2b/Pak2/Tesc/Dbf4/Pik3r1/Ccnd3/Atg13/Map2k2/Chp1/Pik3ca/Taok1	24
GO:0008536	GO:0008536	Ran GTPase binding	9/1171	35/22744	5.16267e-05	0.000975171	0.000782552	Rangap1/Ipo5/Xpot/Ranbp2/Xpo6/Mycbp2/Xpo1/Ipo4/Ipo9	9
GO:0001091	GO:0001091	RNA polymerase II basal transcription factor binding	7/1171	21/22744	5.78949e-05	0.0010698	0.000858488	Ruvbl1/Fbl/Taf2/Crebbp/Edf1/Znhit6/Ercc4	7
GO:0030515	GO:0030515	snoRNA binding	8/1171	28/22744	5.94627e-05	0.00107539	0.000862976	Imp3/Nufip1/Nudt4/Tbl3/Nhp2/Tsr1/Rrp9/Bysl	8
GO:0043995	GO:0043995	histone acetyltransferase activity (H4-K5 specific)	5/1171	10/22744	7.27344e-05	0.00123648	0.00099225	Kansl1/Mcrs1/Kansl3/Hcfc1/Kansl2	5
GO:0043996	GO:0043996	histone acetyltransferase activity (H4-K8 specific)	5/1171	10/22744	7.27344e-05	0.00123648	0.00099225	Kansl1/Mcrs1/Kansl3/Hcfc1/Kansl2	5
GO:0046972	GO:0046972	histone acetyltransferase activity (H4-K16 specific)	5/1171	10/22744	7.27344e-05	0.00123648	0.00099225	Kansl1/Mcrs1/Kansl3/Hcfc1/Kansl2	5
GO:0001056	GO:0001056	RNA polymerase III activity	6/1171	16/22744	9.42285e-05	0.00157047	0.00126027	Polr2l/Polr2e/Polr3e/Polr3h/Polr2f/Crcp	6
GO:0043560	GO:0043560	insulin receptor substrate binding	5/1171	11/22744	0.000127684	0.00208715	0.00167489	Prkcd/Ptpn11/Pik3r1/Jak2/Pik3ca	5
GO:0016779	GO:0016779	nucleotidyltransferase activity	17/1171	120/22744	0.000140471	0.00225283	0.00180784	Polr2l/Nmnat1/Znrd1/Polq/Polr2e/Uap1l1/Chrac1/Rpap1/Polr3e/Uap1/Polr3h/Yrdc/Polr3g/Polr2f/Crcp/Polr1e/Ficd	17
GO:0061631	GO:0061631	ubiquitin conjugating enzyme activity	9/1171	41/22744	0.00019391	0.00305229	0.00244939	Ube2o/Ube2j2/Ube2z/Ube2c/Cdc34b/Ube2l3/Ube3c/Ube2e3/Ube2v1	9
GO:0001054	GO:0001054	RNA polymerase I activity	5/1171	12/22744	0.000209605	0.00323935	0.0025995	Polr2l/Znrd1/Polr2e/Polr2f/Polr1e	5
GO:0004386	GO:0004386	helicase activity	18/1171	138/22744	0.000261735	0.00397276	0.00318805	Dhx33/Fancm/Ruvbl1/Setx/G3bp1/Ddx54/Ddx3x/Ddx20/D1Pas1/Atrx/Chd7/Mcm6/Eif4a3/Ddx27/Chd1/Dna2/Rad54l2/Ddx31	18
GO:0061650	GO:0061650	ubiquitin-like protein conjugating enzyme activity	9/1171	43/22744	0.000284521	0.00424286	0.00340479	Ube2o/Ube2j2/Ube2z/Ube2c/Cdc34b/Ube2l3/Ube3c/Ube2e3/Ube2v1	9
GO:0004518	GO:0004518	nuclease activity	22/1171	189/22744	0.000304739	0.004466	0.00358386	Ago2/Smg5/Fancm/G3bp1/Rps3/Cnot8/Tdp2/Tsen34/Isg20l2/Exd2/Ptbp1/Pde12/Dclre1b/Cnot1/Drosha/Rpp14/Rbbp8/Dis3/Ercc4/Dna2/Nob1/Rpp40	22
GO:0046332	GO:0046332	SMAD binding	13/1171	84/22744	0.000346873	0.00499733	0.00401024	Yy1/Amhr2/Eid2/Ep300/Cited1/Ppm1a/Crebbp/Mef2a/Purb/Smad7/Trim33/Tob1/Drosha	13
GO:0061630	GO:0061630	ubiquitin protein ligase activity	24/1171	217/22744	0.000358494	0.00507867	0.00407551	Rbbp6/Gid4/Fbxo15/Rnf7/Ube2o/Fbxo6/Vhl/Arih2/Cul3/G2e3/Ubr5/Tmem129/Rnf216/Huwe1/Cbl/Herc4/Ube4b/Fbxw11/Ubr3/Rnf6/Dzip3/Mycbp2/Hectd1/Msl2	24
GO:0001098	GO:0001098	basal transcription machinery binding	10/1171	54/22744	0.000379959	0.00520911	0.00418019	Rprd1b/Ago2/Ruvbl1/Fbl/Wac/Taf2/Crebbp/Edf1/Znhit6/Ercc4	10
GO:0001099	GO:0001099	basal RNA polymerase II transcription machinery binding	10/1171	54/22744	0.000379959	0.00520911	0.00418019	Rprd1b/Ago2/Ruvbl1/Fbl/Wac/Taf2/Crebbp/Edf1/Znhit6/Ercc4	10
GO:0001085	GO:0001085	RNA polymerase II transcription factor binding	19/1171	156/22744	0.000433727	0.00585187	0.00469599	Yy1/Mta2/Ruvbl1/Fbl/Tbx3/Ep300/Gata1/Mier3/Taf2/Crebbp/Mkks/Mef2a/Hdac1/Edf1/Znhit6/Atf4/Rbbp8/Gsk3b/Ercc4	19
GO:0061659	GO:0061659	ubiquitin-like protein ligase activity	24/1171	221/22744	0.000468569	0.00622318	0.00499396	Rbbp6/Gid4/Fbxo15/Rnf7/Ube2o/Fbxo6/Vhl/Arih2/Cul3/G2e3/Ubr5/Tmem129/Rnf216/Huwe1/Cbl/Herc4/Ube4b/Fbxw11/Ubr3/Rnf6/Dzip3/Mycbp2/Hectd1/Msl2	24
GO:0008022	GO:0008022	protein C-terminus binding	25/1171	235/22744	0.00049159	0.00642848	0.00515871	Coil/Hic2/Brca2/Ago2/Pias3/Stmn3/Ppp1cc/Pabpc1/Ep300/Cited1/Ppm1a/Sirt1/Ppp2cb/Mapk14/Ciita/Dynll1/Npat/Myo1c/Atf4/Snf8/Pik3r1/Mki67/Jak2/Ercc4/Taok1	25
GO:0008320	GO:0008320	protein transmembrane transporter activity	5/1171	15/22744	0.000698118	0.00899091	0.007215	Tomm20/Tomm22/Sec61a2/Timm17b/Tomm40	5
GO:0032550	GO:0032550	purine ribonucleoside binding	33/1171	353/22744	0.000726911	0.009222	0.00740044	Rab20/Prps1/Rab5a/Gnl1/Rab39/Rab40c/Arhgap5/Gtpbp3/Gpn3/Irgq/Noa1/Dync1li1/Tsr1/Gna11/Gnl3l/Gpn1/Rab1a/Arf4/Fkbp4/Nkiras2/Ciita/Nme2/Drg1/Rab43/Lsg1/Arf6/Srpr/Ran/Gnai2/Rhebl1/Eif5/Rhot1/Gnl3	33
GO:0001883	GO:0001883	purine nucleoside binding	33/1171	357/22744	0.000881393	0.0110174	0.00884122	Rab20/Prps1/Rab5a/Gnl1/Rab39/Rab40c/Arhgap5/Gtpbp3/Gpn3/Irgq/Noa1/Dync1li1/Tsr1/Gna11/Gnl3l/Gpn1/Rab1a/Arf4/Fkbp4/Nkiras2/Ciita/Nme2/Drg1/Rab43/Lsg1/Arf6/Srpr/Ran/Gnai2/Rhebl1/Eif5/Rhot1/Gnl3	33
GO:0001047	GO:0001047	core promoter binding	9/1171	50/22744	0.000915014	0.011223	0.00900616	H2afz/Dr1/Ubtf/Kdm3a/Ago2/Hdac1/Rest/Zbtb17/Kdm5a	9
GO:0032549	GO:0032549	ribonucleoside binding	33/1171	358/22744	0.000924244	0.011223	0.00900616	Rab20/Prps1/Rab5a/Gnl1/Rab39/Rab40c/Arhgap5/Gtpbp3/Gpn3/Irgq/Noa1/Dync1li1/Tsr1/Gna11/Gnl3l/Gpn1/Rab1a/Arf4/Fkbp4/Nkiras2/Ciita/Nme2/Drg1/Rab43/Lsg1/Arf6/Srpr/Ran/Gnai2/Rhebl1/Eif5/Rhot1/Gnl3	33
GO:0003727	GO:0003727	single-stranded RNA binding	13/1171	94/22744	0.0010393	0.0124423	0.00998465	Syncrip/Ago2/Pabpc1/L1td1/Mcrs1/Pabpc4/Ddx3x/Rps7/Zc3h14/Cpeb2/Hnrnpf/Eif4a3/Eif4h	13
GO:0043539	GO:0043539	protein serine/threonine kinase activator activity	6/1171	24/22744	0.0011111	0.0131172	0.0105262	Cab39/Als2/Ddx3x/Dbf4/Map2k2/Taok1	6
GO:0019902	GO:0019902	phosphatase binding	22/1171	209/22744	0.00119462	0.0138993	0.0111539	Ctsc/Smg5/Ppp1r15a/Ppp1cc/Wnk1/Sfi1/Strn3/Traf2/Terf2ip/Mapk14/Kat2a/Cabin1/Pik3r1/Cpd/Snx3/Cep192/Vcp/Cdc5l/Dzip3/Eif2ak3/Nek2/Ptpn1	22
GO:0060589	GO:0060589	nucleoside-triphosphatase regulator activity	28/1171	292/22744	0.00121006	0.0138993	0.0111539	Krit1/Tor1aip2/Sh3bp1/Rangap1/Arhgap5/Tbc1d12/Gm1527/Rgs11/Als2/Arhgap8/Evi5/Ranbp2/Ralgds/Tbc1d9/Tor1aip1/Arl2bp/Bag1/Llgl2/Arhgap1/Arhgap29/Tbc1d13/Sesn2/Racgap1/Arhgef12/Agfg1/Rasa2/Nf1/Depdc5	28
GO:0036002	GO:0036002	pre-mRNA binding	7/1171	33/22744	0.00123761	0.0140263	0.0112558	Snrpc/Srsf6/Ep300/U2af1/Rnpc3/Ptbp1/Zrsr1	7
GO:0030695	GO:0030695	GTPase regulator activity	25/1171	253/22744	0.00142391	0.0159253	0.0127797	Krit1/Sh3bp1/Rangap1/Arhgap5/Tbc1d12/Gm1527/Rgs11/Als2/Arhgap8/Evi5/Ranbp2/Ralgds/Tbc1d9/Arl2bp/Llgl2/Arhgap1/Arhgap29/Tbc1d13/Sesn2/Racgap1/Arhgef12/Agfg1/Rasa2/Nf1/Depdc5	25
GO:0001882	GO:0001882	nucleoside binding	33/1171	368/22744	0.00146365	0.0161572	0.0129657	Rab20/Prps1/Rab5a/Gnl1/Rab39/Rab40c/Arhgap5/Gtpbp3/Gpn3/Irgq/Noa1/Dync1li1/Tsr1/Gna11/Gnl3l/Gpn1/Rab1a/Arf4/Fkbp4/Nkiras2/Ciita/Nme2/Drg1/Rab43/Lsg1/Arf6/Srpr/Ran/Gnai2/Rhebl1/Eif5/Rhot1/Gnl3	33
GO:0019001	GO:0019001	guanyl nucleotide binding	33/1171	369/22744	0.00153026	0.0164648	0.0132126	Rab20/Prps1/Rab5a/Gnl1/Rab39/Rab40c/Arhgap5/Gtpbp3/Gpn3/Irgq/Noa1/Dync1li1/Tsr1/Gna11/Gnl3l/Gpn1/Rab1a/Arf4/Fkbp4/Nkiras2/Ciita/Nme2/Drg1/Rab43/Lsg1/Arf6/Srpr/Ran/Gnai2/Rhebl1/Eif5/Rhot1/Gnl3	33
GO:0032561	GO:0032561	guanyl ribonucleotide binding	33/1171	369/22744	0.00153026	0.0164648	0.0132126	Rab20/Prps1/Rab5a/Gnl1/Rab39/Rab40c/Arhgap5/Gtpbp3/Gpn3/Irgq/Noa1/Dync1li1/Tsr1/Gna11/Gnl3l/Gpn1/Rab1a/Arf4/Fkbp4/Nkiras2/Ciita/Nme2/Drg1/Rab43/Lsg1/Arf6/Srpr/Ran/Gnai2/Rhebl1/Eif5/Rhot1/Gnl3	33
GO:0035257	GO:0035257	nuclear hormone receptor binding	17/1171	148/22744	0.0016306	0.0173251	0.013903	Psmc3ip/Kdm3a/C1d/Med13/Ddx54/Ep300/Kdm4c/Rarg/Sirt1/Tob2/Cnot1/Fkbp4/Med25/Rnf6/Pik3r1/Ncoa1/Arid5a	17
GO:0016747	GO:0016747	transferase activity, transferring acyl groups other than amino-acyl groups	23/1171	228/22744	0.00165236	0.0173395	0.0139146	Elovl6/Brca2/Brpf1/Zdhhc7/Ep300/Kansl1/Mcrs1/Crebbp/Kat2b/Kansl3/Esco1/Taf5l/Crot/Kat2a/Dpf2/Usp22/Gpat4/Ncoa1/Epc2/Sat1/Hcfc1/Kat6a/Kansl2	23
GO:0070181	GO:0070181	small ribosomal subunit rRNA binding	4/1171	11/22744	0.00172349	0.0175059	0.0140481	Rps13/Rps3/Utp23/Rps14	4
GO:0051427	GO:0051427	hormone receptor binding	19/1171	175/22744	0.00174952	0.0175059	0.0140481	Psmc3ip/Kdm3a/C1d/Med13/Ddx54/Ep300/Kdm4c/Rarg/Sirt1/Tob2/Ptpn11/Cnot1/Fkbp4/Med25/Rnf6/Pik3r1/Ncoa1/Arid5a/Jak2	19
GO:0022884	GO:0022884	macromolecule transmembrane transporter activity	5/1171	18/22744	0.00175059	0.0175059	0.0140481	Tomm20/Tomm22/Sec61a2/Timm17b/Tomm40	5
GO:0055106	GO:0055106	ubiquitin-protein transferase regulator activity	5/1171	18/22744	0.00175059	0.0175059	0.0140481	Trib3/Rps7/Rpl23/Ube2l3/Rpl11	5
GO:0070717	GO:0070717	poly-purine tract binding	7/1171	35/22744	0.00178096	0.0176025	0.0141256	Syncrip/Pabpc1/Mcrs1/Pabpc4/Ddx3x/Zc3h14/Eif4a3	7
GO:0016746	GO:0016746	transferase activity, transferring acyl groups	25/1171	260/22744	0.00207235	0.02019	0.016202	Elovl6/Brca2/Kmt2c/Brpf1/Zdhhc7/Ep300/Kansl1/Mcrs1/Crebbp/Kat2b/Kansl3/Esco1/Taf5l/Ciita/Crot/Kat2a/Dpf2/Usp22/Gpat4/Ncoa1/Epc2/Sat1/Hcfc1/Kat6a/Kansl2	25
GO:0003755	GO:0003755	peptidyl-prolyl cis-trans isomerase activity	7/1171	36/22744	0.00211402	0.02019	0.016202	Ppil1/Pin1/Fkbp3/Nktr/Ranbp2/Fkbp4/Ppia	7
GO:0051019	GO:0051019	mitogen-activated protein kinase binding	7/1171	36/22744	0.00211402	0.02019	0.016202	Tpr/Ep300/Gtf2i/Sirt1/Mapk14/Mapkapk5/Tnip1	7
GO:0008143	GO:0008143	poly(A) binding	6/1171	27/22744	0.00214116	0.0202221	0.0162277	Syncrip/Pabpc1/Pabpc4/Ddx3x/Zc3h14/Eif4a3	6
GO:0004519	GO:0004519	endonuclease activity	14/1171	116/22744	0.00256162	0.0239272	0.0192011	Ago2/G3bp1/Rps3/Tdp2/Tsen34/Ptbp1/Drosha/Rpp14/Rbbp8/Dis3/Ercc4/Dna2/Nob1/Rpp40	14
GO:0003730	GO:0003730	mRNA 3'-UTR binding	11/1171	81/22744	0.00285169	0.0263471	0.0211429	Pabpc1/Larp1/Pabpc4/Utp23/Rps7/Angel2/Cpeb2/Fxr2/Rnf20/Rc3h1/Hnrnpr	11
GO:0008139	GO:0008139	nuclear localization sequence binding	5/1171	21/22744	0.00365611	0.0334161	0.0268156	Kpna1/Tnpo3/Ipo5/Kpna6/Ipo4	5
GO:0004407	GO:0004407	histone deacetylase activity	6/1171	30/22744	0.00376515	0.0336882	0.027034	Mta2/Gm10093/Sirt1/Hdac1/Nacc2/Hdac6	6
GO:0050681	GO:0050681	androgen receptor binding	6/1171	30/22744	0.00376515	0.0336882	0.027034	Psmc3ip/Kdm3a/Ep300/Kdm4c/Rnf6/Arid5a	6
GO:0016859	GO:0016859	cis-trans isomerase activity	7/1171	40/22744	0.00394868	0.0349623	0.0280564	Ppil1/Pin1/Fkbp3/Nktr/Ranbp2/Fkbp4/Ppia	7
GO:0005525	GO:0005525	GTP binding	30/1171	347/22744	0.00400808	0.0351224	0.0281849	Rab20/Rab5a/Gnl1/Rab39/Rab40c/Arhgap5/Gtpbp3/Gpn3/Irgq/Noa1/Tsr1/Gna11/Gnl3l/Gpn1/Rab1a/Arf4/Fkbp4/Nkiras2/Ciita/Drg1/Rab43/Lsg1/Arf6/Srpr/Ran/Gnai2/Rhebl1/Eif5/Rhot1/Gnl3	30
GO:0033558	GO:0033558	protein deacetylase activity	6/1171	31/22744	0.00446876	0.0380052	0.0304983	Mta2/Gm10093/Sirt1/Hdac1/Nacc2/Hdac6	6
GO:0030295	GO:0030295	protein kinase activator activity	10/1171	74/22744	0.00451291	0.0380052	0.0304983	Rplp1/Cab39/Wnk1/Als2/Ddx3x/Pak2/Dbf4/Map2k2/Pik3ca/Taok1	10
GO:0090079	GO:0090079	translation regulator activity, nucleic acid binding	5/1171	22/22744	0.00453355	0.0380052	0.0304983	Shmt1/Larp1/Purb/C1qbp/Cpeb2	5
GO:0005048	GO:0005048	signal sequence binding	7/1171	41/22744	0.00455406	0.0380052	0.0304983	Tomm20/Kpna1/Tnpo3/Ipo5/Sec61a2/Kpna6/Ipo4	7
GO:0035258	GO:0035258	steroid hormone receptor binding	11/1171	86/22744	0.00456063	0.0380052	0.0304983	Psmc3ip/Kdm3a/Ddx54/Ep300/Kdm4c/Cnot1/Fkbp4/Rnf6/Pik3r1/Ncoa1/Arid5a	11
GO:0052742	GO:0052742	phosphatidylinositol kinase activity	4/1171	14/22744	0.00461865	0.0381151	0.0305865	Pi4k2a/Pi4k2b/Pik3r1/Pik3ca	4
GO:0051059	GO:0051059	NF-kappaB binding	6/1171	32/22744	0.00526466	0.0430285	0.0345293	Commd7/Taf4b/Akap8/Ep300/Hdac1/Gsk3b	6
GO:0032183	GO:0032183	SUMO binding	4/1171	15/22744	0.0060443	0.0489301	0.0392652	Uspl1/Herc2/Casp8ap2/Simc1	4
GO:0016504	GO:0016504	peptidase activator activity	6/1171	33/22744	0.00615956	0.0493927	0.0396365	Ctsc/Psme4/Casp8ap2/Clpx/Apaf1/Vcp	6

## Sheet: Zygote_2-cell_Up_CC
	ID	Description	GeneRatio	BgRatio	pvalue	p.adjust	qvalue	geneID	Count
GO:0022626	GO:0022626	cytosolic ribosome	57/1207	149/23416	8.62361e-35	5.38113e-32	4.21195e-32	Rpl23a/Rpl9/Rplp1/Rps17/Uba52/Rps19/Rps6/Rps23/Rpl18/Rpl6/Rps2/Rpl13/Rpl24/Rps26/Rps24/Rplp2/Rpl10l/Rps13/Nufip1/Zfp622/Rps3a1/Rps21/Rps9/Rps3/Rps25/Rps15/Rpl12/Rpsa/Rps20/Rsl24d1/Ddx3x/Rpl39/Eif2a/Rpl37a/Rpl37/Rps8/Rpl8/Rplp0/Rps7/Rpl23/Rpl35/Rpl19/Rpl10a/Rpl30/Rpl21/Rps5/Rpl18a/Rps29/Rps4x/Rpl35a/Rpl11/Surf6/Rpl27a/Rpl15/Rpl10/Eif2ak3/Rps14	57
GO:0005840	GO:0005840	ribosome	69/1207	267/23416	1.2055e-29	3.76117e-27	2.94397e-27	Rpl23a/Rpl9/Rplp1/Rps17/Uba52/Rpl41/Rps19/Rps6/Rps23/Rpl18/Rpl6/Rps2/Rpl13/Rpl24/Rps26/Rps24/Rplp2/Rpl10l/Rps13/Nufip1/Zfp622/Rps3a1/Rps21/Rps9/Rps3/Mrpl51/Rps25/Rps15/Mrpl43/Rpl12/Rpsa/Rps20/Rsl24d1/Ddx3x/Mrpl49/Rpl39/Gm2000/Mrpl20/Eif2a/Rpl37a/Eif3h/Rpl37/Mrpl40/Rps8/Rpl8/Denr/Rplp0/Rps7/Mrps30/Mrpl34/Rpl23/Rpl35/Rpl19/Rpl10a/Mrps7/Rpl30/Rpl21/Rps5/Rpl18a/Rps29/Rps4x/Rpl35a/Rpl11/Surf6/Rpl27a/R…	69
GO:0044391	GO:0044391	ribosomal subunit	63/1207	228/23416	5.96873e-29	1.2415e-26	9.71751e-27	Rpl23a/Rpl9/Rplp1/Rps17/Uba52/Rps19/Rps6/Rps23/Rpl18/Rpl6/Rps2/Rpl13/Rpl24/Rps26/Rps24/Rplp2/Rpl10l/Rps13/Zfp622/Rps3a1/Rps21/Rps9/Rps3/Mrpl51/Rps25/Rps15/Mrpl43/Rpl12/Rpsa/Rps20/Rsl24d1/Ddx3x/Mrpl49/Rpl39/Mrpl20/Eif2a/Rpl37a/Rpl37/Mrpl40/Rps8/Rpl8/Rplp0/Rps7/Mrps30/Mrpl34/Rpl23/Rpl35/Rpl19/Rpl10a/Mrps7/Rpl30/Rpl21/Rps5/Rpl18a/Rps29/Rps4x/Rpl35a/Rpl11/Surf6/Rpl27a/Rpl15/Rpl10/Rps14	63
GO:0044445	GO:0044445	cytosolic part	69/1207	302/23416	3.53612e-26	5.51635e-24	4.31779e-24	Dhx33/Rpl23a/Rpl9/Rplp1/Rps17/Uba52/Rps19/Rps6/Rps23/Rpl18/Rpl6/Rps2/Rpl13/Hnrnpab/Pin1/Fbxo45/Pi4k2a/Rpl24/Rps26/Rps24/Rplp2/Rpl10l/Rps13/Nufip1/Zfp622/Rps3a1/Prkcd/Rps21/Rps9/Rps3/Rps25/Rps15/Rpl12/Pten/Rpsa/Rps20/Rsl24d1/Ddx3x/Rpl39/Borcs6/Eif2a/Rpl37a/Rpl37/Rps8/Rpl8/Rplp0/Rps7/Rpl23/Rpl35/Rpl19/Apaf1/Rpl10a/Rpl30/Rpl21/Rps5/Eif4a3/Rpl18a/Rps29/Chuk/Rps4x/Rpl35a/Rpl11/Surf6/Rpl27a/Rpl15/Rpl10…	69
GO:0005844	GO:0005844	polysome	29/1207	75/23416	1.67746e-18	2.07936e-16	1.62757e-16	Rps6/Rps23/Rpl18/Rpl6/Ago2/Rpl24/Rps26/Rpl10l/Eif4g1/Rps21/Rps3/Rps25/Mcrs1/Larp1/Rwdd1/Rpl39/Drg1/Eif3h/Rpl8/Rpl19/Rpl10a/Rpl30/Cpeb2/Rpl18a/Rps29/Fxr2/Rps4x/Rpl11/Eif4h	29
GO:0022627	GO:0022627	cytosolic small ribosomal subunit	25/1207	54/23416	1.99939e-18	2.07936e-16	1.62757e-16	Rps17/Uba52/Rps19/Rps6/Rps23/Rps2/Rps26/Rps24/Rps13/Rps3a1/Rps21/Rps9/Rps3/Rps25/Rps15/Rpsa/Rps20/Ddx3x/Eif2a/Rps8/Rps7/Rps5/Rps29/Rps4x/Rps14	25
GO:0022625	GO:0022625	cytosolic large ribosomal subunit	31/1207	88/23416	2.67623e-18	2.38566e-16	1.86732e-16	Rpl23a/Rpl9/Rplp1/Uba52/Rpl18/Rpl6/Rpl13/Rpl24/Rplp2/Rpl10l/Zfp622/Rpl12/Rsl24d1/Rpl39/Rpl37a/Rpl37/Rpl8/Rplp0/Rpl23/Rpl35/Rpl19/Rpl10a/Rpl30/Rpl21/Rpl18a/Rpl35a/Rpl11/Surf6/Rpl27a/Rpl15/Rpl10	31
GO:0015934	GO:0015934	large ribosomal subunit	38/1207	149/23416	1.06755e-16	8.32688e-15	6.51767e-15	Rpl23a/Rpl9/Rplp1/Uba52/Rpl18/Rpl6/Rpl13/Rpl24/Rplp2/Rpl10l/Zfp622/Mrpl51/Mrpl43/Rpl12/Rsl24d1/Mrpl49/Rpl39/Mrpl20/Rpl37a/Rpl37/Mrpl40/Rpl8/Rplp0/Mrps30/Mrpl34/Rpl23/Rpl35/Rpl19/Rpl10a/Rpl30/Rpl21/Rpl18a/Rpl35a/Rpl11/Surf6/Rpl27a/Rpl15/Rpl10	38
GO:0015935	GO:0015935	small ribosomal subunit	26/1207	84/23416	4.95053e-14	3.43236e-12	2.6866e-12	Rps17/Uba52/Rps19/Rps6/Rps23/Rps2/Rps26/Rps24/Rps13/Rps3a1/Rps21/Rps9/Rps3/Rps25/Rps15/Rpsa/Rps20/Ddx3x/Eif2a/Rps8/Rps7/Mrps7/Rps5/Rps29/Rps4x/Rps14	26
GO:0098687	GO:0098687	chromosomal region	49/1207	293/23416	2.80325e-13	1.74923e-11	1.36917e-11	Zscan4f/Brca2/Smc6/Apc/Tpr/Rangap1/Setx/Ahctf1/Kansl1/Wrap53/Kdm4c/Tox4/Crebbp/Dync1li1/Ppp2cb/Terf2ip/Snai1/Cbx3/Kat2b/Chek2/Hmbox1/Dclre1b/Dynll1/Ska1/Cenpt/Ncapd2/Rad21/Csnk1a1/Atrx/Nabp1/Nudcd2/Rad17/Ska3/Ctcf/Nde1/Suv39h1/Stag2/Mki67/Ppp1r12a/Xpo1/Smchd1/Cfdp1/Baz1b/Spc25/Ercc4/Dna2/Smc1b/Nek2/Rif1	49
GO:0042788	GO:0042788	polysomal ribosome	15/1207	31/23416	6.09877e-12	3.45967e-10	2.70797e-10	Rps23/Rpl18/Rpl6/Rpl24/Rps26/Rps21/Rpl39/Eif3h/Rpl8/Rpl19/Rpl10a/Rpl30/Rpl18a/Rps29/Rpl11	15
GO:0000123	GO:0000123	histone acetyltransferase complex	23/1207	81/23416	1.05367e-11	5.47909e-10	4.28863e-10	Dr1/Ruvbl1/Brpf1/Ep300/Kansl1/Jade1/Mcrs1/Atxn7l3/Taf2/Crebbp/Kat2b/Kansl3/Taf5l/Brd1/Kat2a/Dpf2/Zzz3/Usp22/Epc2/Hcfc1/Kat6a/Kansl2/Msl2	23
GO:0030684	GO:0030684	preribosome	22/1207	76/23416	1.93887e-11	9.30657e-10	7.2845e-10	Utp14b/Mak16/Imp3/Noc2l/Zfp622/Fbl/Tbl3/Fbxw9/Pdcd11/Tsr1/Utp23/Bop1/Rps7/Rrp9/Bysl/Nip7/Rrs1/Utp14a/Rrp15/Emg1/Nob1/Wdr36	22
GO:0031248	GO:0031248	protein acetyltransferase complex	23/1207	91/23416	1.41931e-10	5.90433e-09	4.62148e-09	Dr1/Ruvbl1/Brpf1/Ep300/Kansl1/Jade1/Mcrs1/Atxn7l3/Taf2/Crebbp/Kat2b/Kansl3/Taf5l/Brd1/Kat2a/Dpf2/Zzz3/Usp22/Epc2/Hcfc1/Kat6a/Kansl2/Msl2	23
GO:1902493	GO:1902493	acetyltransferase complex	23/1207	91/23416	1.41931e-10	5.90433e-09	4.62148e-09	Dr1/Ruvbl1/Brpf1/Ep300/Kansl1/Jade1/Mcrs1/Atxn7l3/Taf2/Crebbp/Kat2b/Kansl3/Taf5l/Brd1/Kat2a/Dpf2/Zzz3/Usp22/Epc2/Hcfc1/Kat6a/Kansl2/Msl2	23
GO:0000775	GO:0000775	chromosome, centromeric region	33/1207	188/23416	5.91728e-10	2.30774e-08	1.80633e-08	Apc/Tpr/Rangap1/Ahctf1/Kansl1/Kdm4c/Crebbp/Dync1li1/Ppp2cb/Snai1/Cbx3/Kat2b/Dynll1/Ska1/Cenpt/Ncapd2/Rad21/Csnk1a1/Atrx/Nudcd2/Ska3/Ctcf/Nde1/Suv39h1/Stag2/Mki67/Ppp1r12a/Xpo1/Cfdp1/Baz1b/Spc25/Smc1b/Nek2	33
GO:0061695	GO:0061695	transferase complex, transferring phosphorus-containing groups	38/1207	247/23416	1.53788e-09	5.64493e-08	4.41843e-08	Cdk9/Rprd1b/Socs3/Prps1/Taf4b/Polr2l/Ccna2/Prps1l3/Gm5435/Cdk1/Cdkn2d/Ulk1/Znrd1/Ccnjl/Polr2e/Ccne1/Taf2/Rpap1/Taf5l/Rb1cc1/Kat2a/Polr3e/Setd5/Polr3h/Sesn2/Polr3g/Pik3r1/Rprd1a/Polr2f/Ccnd3/Chuk/Crcp/Atg13/Polr1e/Ercc4/Dna2/Cdk12/Pik3ca	38
GO:0044452	GO:0044452	nucleolar part	31/1207	180/23416	3.14439e-09	1.09006e-07	8.53215e-08	Nol11/Coil/Ubtf/Taf4b/Polr2l/Spata2/Imp3/Taf1d/Nufip1/Fbl/Tbl3/Znrd1/Nhp2/Fbxw9/Ccdc137/Polr2e/Smad7/Pspc1/Sp140/Bop1/Herc4/Rrp9/Rrs1/Polr2f/Chd1/Aff4/Polr1e/Surf6/Wdr36/Rpp40/Cdk12	31
GO:0005681	GO:0005681	spliceosomal complex	31/1207	183/23416	4.74228e-09	1.55747e-07	1.21907e-07	Snrpc/Ppp1r8/Syncrip/Rbm5/Srsf1/Snrnp25/Ppil1/Cwc22/Pabpc1/Sf3b6/Wac/Gpkow/U2af1/Rnpc3/Rbm8a/Snrpb/Gm13691/Gemin2/Srrm2/Bud31/Hnrnpm/Hnrnpf/Eif4a3/Lsm2/Cdc5l/Sf3b5/Zrsr1/Smndc1/Ybx1/Hnrnpr/Sf3b1	31
GO:1902562	GO:1902562	H4 histone acetyltransferase complex	12/1207	42/23416	8.7287e-07	2.72335e-05	2.13164e-05	Dr1/Ruvbl1/Kansl1/Mcrs1/Kat2b/Kansl3/Kat2a/Zzz3/Epc2/Hcfc1/Kansl2/Msl2	12
GO:0032040	GO:0032040	small-subunit processome	11/1207	37/23416	1.61364e-06	4.79482e-05	3.75303e-05	Utp14b/Imp3/Fbl/Tbl3/Pdcd11/Utp23/Rps7/Rrp9/Utp14a/Emg1/Wdr36	11
GO:0000790	GO:0000790	nuclear chromatin	44/1207	398/23416	1.69644e-06	4.81171e-05	3.76625e-05	Yy1/Gabpa/H2afz/Cdk9/H2afv/Baz1a/Mta2/Bend3/Ruvbl1/Nufip1/Akap8/Gm10093/Kdm4c/Hmgb3/Mcrs1/Rarg/Sirt1/Crebbp/Mef2a/Hdac1/Cpsf6/Cbx3/Chrac1/Kat2b/Srcap/Kat2a/Arid2/Dpf2/Atrx/Nacc2/Hira/Polr3g/Smarcc1/Ncoa1/Rad17/Suv39h1/Rad51ap1/Cecr2/Kat6a/Ipo4/E2f1/Cdk12/Rif1/Tcp1	44
GO:0030880	GO:0030880	RNA polymerase complex	19/1207	106/23416	1.83683e-06	4.98341e-05	3.90065e-05	Rprd1b/Taf4b/Polr2l/Gm5435/Znrd1/Polr2e/Taf2/Rpap1/Taf5l/Kat2a/Polr3e/Setd5/Polr3h/Polr3g/Rprd1a/Polr2f/Crcp/Polr1e/Ercc4	19
GO:0071013	GO:0071013	catalytic step 2 spliceosome	16/1207	82/23416	3.7563e-06	9.76639e-05	7.64441e-05	Syncrip/Srsf1/Ppil1/Cwc22/Pabpc1/Sf3b6/Rbm8a/Snrpb/Gm13691/Hnrnpm/Hnrnpf/Eif4a3/Lsm2/Cdc5l/Hnrnpr/Sf3b1	16
GO:0055029	GO:0055029	nuclear DNA-directed RNA polymerase complex	18/1207	102/23416	4.29084e-06	0.000107099	8.38295e-05	Rprd1b/Taf4b/Polr2l/Gm5435/Znrd1/Polr2e/Taf2/Taf5l/Kat2a/Polr3e/Setd5/Polr3h/Polr3g/Rprd1a/Polr2f/Crcp/Polr1e/Ercc4	18
GO:0000428	GO:0000428	DNA-directed RNA polymerase complex	18/1207	103/23416	4.95198e-06	0.000118848	9.3025e-05	Rprd1b/Taf4b/Polr2l/Gm5435/Znrd1/Polr2e/Taf2/Taf5l/Kat2a/Polr3e/Setd5/Polr3h/Polr3g/Rprd1a/Polr2f/Crcp/Polr1e/Ercc4	18
GO:0016607	GO:0016607	nuclear speck	35/1207	305/23416	8.46311e-06	0.000195592	0.000153095	Rbbp6/Hipk1/Cdc25c/Ppp1r8/Poldip3/Srsf1/Zfp217/Brd2/Pip5k1a/Cwc22/Srsf6/Jade1/U2af1/Itpkc/Cpsf6/Tbxa2r/Mapk14/Rbm8a/Taf5l/Brd1/Maml1/Csnk1a1/Usp36/Ncapg2/Usp22/Srsf11/Zc3h14/Raf1/Haus6/Cdc5l/Kat6a/Rbm15/Rad54l2/Cdk12/Sf3b1	35
GO:0000776	GO:0000776	kinetochore	20/1207	130/23416	1.11969e-05	0.000249531	0.000195315	Apc/Tpr/Rangap1/Ahctf1/Kansl1/Crebbp/Dync1li1/Kat2b/Dynll1/Ska1/Cenpt/Csnk1a1/Nudcd2/Ska3/Nde1/Ppp1r12a/Xpo1/Cfdp1/Spc25/Nek2	20
GO:0000151	GO:0000151	ubiquitin ligase complex	32/1207	275/23416	1.53021e-05	0.000325521	0.000254794	Rnf11/Gid4/Fbxo15/Rnf7/Fbxo6/Vhl/Pcgf5/Arih2/Fbxo45/Cul3/Ube2j2/Traf2/Ddb1/Klhl21/Phc2/Ube2c/Zyg11b/Ube4b/Fbxw11/Ube2l3/Usp47/Traf7/Ubr3/Wdr26/Dcaf10/Zswim4/Ube2v1/Rnf20/Depdc5/Cand1/Fbxo11/Dda1	32
GO:0016605	GO:0016605	PML body	14/1207	72/23416	1.565e-05	0.000325521	0.000254794	Calcoco2/Hipk1/Cdk9/Smc6/Casp8ap2/Tdp2/Sirt1/Crebbp/Hipk3/Chek2/Ciita/Atrx/Rnf6/Kat6a	14
GO:0030687	GO:0030687	preribosome, large subunit precursor	8/1207	24/23416	1.70679e-05	0.000343561	0.000268914	Mak16/Noc2l/Zfp622/Fbxw9/Bop1/Nip7/Rrs1/Rrp15	8
GO:0005666	GO:0005666	RNA polymerase III complex	7/1207	18/23416	1.83027e-05	0.000356903	0.000279357	Polr2l/Polr2e/Polr3e/Polr3h/Polr3g/Polr2f/Crcp	7
GO:0005635	GO:0005635	nuclear envelope	41/1207	402/23416	2.63677e-05	0.000498589	0.000390259	Kpna1/Zc3hc1/Mad2l1bp/Osbpl6/Apc/Slc30a1/Tmem170/Plcd4/Tpr/Tor1b/Rangap1/Trib3/Ahctf1/Rtn4/Ipo5/Lemd3/Xpot/Akirin1/Sirt1/AI464131/Terf2ip/Cbx3/Ranbp2/Kpna6/Rb1cc1/Tor1aip1/Gpx4/Nav3/Bnip3/Hacd3/Casc3/Myo1c/Ran/Rnf6/Dhcr7/Tmpo/Xpo1/Ipo4/Ybx1/Ipo9/Rif1	41
GO:0000781	GO:0000781	chromosome, telomeric region	17/1207	107/23416	3.27224e-05	0.000589414	0.00046135	Zscan4f/Brca2/Smc6/Setx/Wrap53/Tox4/Terf2ip/Chek2/Hmbox1/Dclre1b/Atrx/Nabp1/Rad17/Smchd1/Ercc4/Dna2/Rif1	17
GO:0005689	GO:0005689	U12-type spliceosomal complex	8/1207	26/23416	3.30601e-05	0.000589414	0.00046135	Snrnp25/Sf3b6/Rnpc3/Snrpb/Sf3b5/Zrsr1/Ybx1/Sf3b1	8
GO:0015030	GO:0015030	Cajal body	9/1207	35/23416	5.21268e-05	0.00090353	0.000707217	Coil/Uspl1/Fbl/Wrap53/Lsg1/Npat/Angel2/Zpr1/Ak6	9
GO:0036464	GO:0036464	cytoplasmic ribonucleoprotein granule	24/1207	193/23416	5.9918e-05	0.00101051	0.000790951	Cdk9/Rps6/Rpl6/Ago2/Poldip3/Rock1/Kif3c/Pabpc1/G3bp1/Cnot8/Larp1/Ajuba/Pabpc4/Ddx3x/Taf5l/Cnot1/Rplp0/Ythdf2/Lsm2/Vcp/Fxr2/Rc3h1/Ybx1/Rock2	24
GO:0005852	GO:0005852	eukaryotic translation initiation factor 3 complex	6/1207	15/23416	6.19938e-05	0.00101774	0.000796611	Eif3j2/Ddx3x/Eif3b/Eif3c/Eif3h/Eif3f	6
GO:0035770	GO:0035770	ribonucleoprotein granule	25/1207	206/23416	6.36087e-05	0.00101774	0.000796611	Cdk9/Rps6/Rpl6/Ago2/Poldip3/Rock1/Kif3c/Pabpc1/G3bp1/Cnot8/Larp1/Ajuba/Pabpc4/Grsf1/Ddx3x/Taf5l/Cnot1/Rplp0/Ythdf2/Lsm2/Vcp/Fxr2/Rc3h1/Ybx1/Rock2	25
GO:0000793	GO:0000793	condensed chromosome	25/1207	208/23416	7.45295e-05	0.00116266	0.000910044	Brca2/Smc6/Ttn/Akap8/Ahctf1/Wapl/Crebbp/Cbx3/Hmbs/Ska1/Ncapd2/Sycp2/Rad21/Atrx/Ncapg2/Rrs1/Ska3/Ctcf/Stag2/Mki67/Baz1b/Spc25/Smc1b/Nek2/Rif1	25
GO:0034708	GO:0034708	methyltransferase complex	17/1207	118/23416	0.000115605	0.00175946	0.00137717	Wdr77/Kmt2c/Ruvbl1/Kansl1/Kdm4c/Mcrs1/Sirt1/Rest/Snrpb/Kdm5a/Kdm5b/Hcfc1/Mga/Senp3/Rbm15/Zfp335/Ncoa6	17
GO:0034045	GO:0034045	phagophore assembly site membrane	5/1207	12/23416	0.000210794	0.00305896	0.00239433	Wipi2/Wdr45b/Ulk1/Rb1cc1/Wdr45	5
GO:0044754	GO:0044754	autolysosome	5/1207	12/23416	0.000210794	0.00305896	0.00239433	Map1lc3b/Lamp2/Map1lc3a/Fth1/Ftl1	5
GO:0031965	GO:0031965	nuclear membrane	26/1207	237/23416	0.000241725	0.0034281	0.00268327	Zc3hc1/Mad2l1bp/Osbpl6/Apc/Slc30a1/Plcd4/Tpr/Rangap1/Trib3/Ahctf1/Ipo5/Lemd3/Akirin1/Sirt1/AI464131/Rb1cc1/Tor1aip1/Hacd3/Casc3/Rnf6/Dhcr7/Tmpo/Xpo1/Ipo4/Ybx1/Rif1	26
GO:1902554	GO:1902554	serine/threonine protein kinase complex	13/1207	82/23416	0.000275246	0.00381675	0.00298747	Cdk9/Ccna2/Cdk1/Cdkn2d/Ulk1/Ccnjl/Ccne1/Rb1cc1/Sesn2/Ccnd3/Chuk/Atg13/Cdk12	13
GO:0035097	GO:0035097	histone methyltransferase complex	14/1207	93/23416	0.000283746	0.00384908	0.00301278	Kmt2c/Ruvbl1/Kansl1/Kdm4c/Mcrs1/Sirt1/Rest/Kdm5a/Kdm5b/Hcfc1/Mga/Senp3/Zfp335/Ncoa6	14
GO:0001650	GO:0001650	fibrillar center	17/1207	128/23416	0.000313796	0.00416614	0.00326094	Coil/Ubtf/Taf4b/Spata2/Nufip1/Fbl/Ccdc137/Smad7/Pspc1/Sp140/Herc4/Rrs1/Polr2f/Chd1/Aff4/Polr1e/Cdk12	17
GO:0008023	GO:0008023	transcription elongation factor complex	10/1207	53/23416	0.000327595	0.00417716	0.00326957	Cdk9/Ell2/Nufip1/Nelfb/Mms22l/Setd5/Eaf1/Aff1/Aff4/Cdk12	10
GO:0005736	GO:0005736	RNA polymerase I complex	5/1207	13/23416	0.000328014	0.00417716	0.00326957	Polr2l/Znrd1/Polr2e/Polr2f/Polr1e	5
GO:0034399	GO:0034399	nuclear periphery	16/1207	118/23416	0.000367893	0.0045913	0.00359373	Yy1/Tpr/Ruvbl1/Nufip1/Akap8/Prkcd/Ahctf1/Ipo5/Xpot/Rad21/Atf4/Hnrnpm/Stag2/Jak2/Ipo4/Sf3b1	16
GO:0005667	GO:0005667	transcription factor complex	38/1207	411/23416	0.000383058	0.00468683	0.00366851	Yy1/Nfatc3/Taf4b/Hnrnpab/Gtf3c5/Mta2/Taf1d/Gm5435/Tbx3/Ep300/Gata1/Rcor2/Gtf3c1/Taf2/Rarg/Ajuba/Crebbp/Mef2a/Hdac1/Med14/Smad7/Gtf3c6/Taf5l/Kat2a/Arid2/Med26/Med25/Rcor1/Atf4/Snf8/Ecsit/Wwtr1/Nfyb/Mga/Arid5a/Ercc4/E2f1/Ncoa6	38
GO:0070603	GO:0070603	SWI/SNF superfamily-type complex	12/1207	76/23416	0.000485727	0.00575301	0.00450303	Yy1/Baz1a/Mta2/Ruvbl1/Mcrs1/Hdac1/Chrac1/Srcap/Arid2/Dpf2/Smarcc1/Cecr2	12
GO:0005671	GO:0005671	Ada2/Gcn5/Ada3 transcription activator complex	5/1207	14/23416	0.000488637	0.00575301	0.00450303	Dr1/Kat2b/Kat2a/Zzz3/Hcfc1	5
GO:0005849	GO:0005849	mRNA cleavage factor complex	6/1207	21/23416	0.000514763	0.00594837	0.00465594	Clp1/Pip5k1a/Cstf2t/Cpsf6/Csnk1a1/Ssu72	6
GO:1902555	GO:1902555	endoribonuclease complex	7/1207	29/23416	0.000545237	0.0060755	0.00475545	Clp1/Ago2/Tsen34/Drosha/Rpp14/Rpp40/Trmt10c	7
GO:1905348	GO:1905348	endonuclease complex	7/1207	29/23416	0.000545237	0.0060755	0.00475545	Clp1/Ago2/Tsen34/Drosha/Rpp14/Rpp40/Trmt10c	7
GO:0005776	GO:0005776	autophagosome	11/1207	68/23416	0.000668671	0.00730037	0.00571419	Map1lc3b/Wipi2/Lamp2/Ulk1/Pip4k2c/Fyco1/Map1lc3a/Gabarapl2/Fth1/Ftl1/Atg9a	11
GO:0000407	GO:0000407	phagophore assembly site	7/1207	30/23416	0.000679824	0.00730037	0.00571419	Wipi2/Wdr45b/Ulk1/Rb1cc1/Wdr45/Atg13/Atg9a	7
GO:0016591	GO:0016591	RNA polymerase II, holoenzyme	12/1207	79/23416	0.000695871	0.00730037	0.00571419	Rprd1b/Taf4b/Polr2l/Gm5435/Polr2e/Taf2/Taf5l/Kat2a/Setd5/Rprd1a/Polr2f/Ercc4	12
GO:0005767	GO:0005767	secondary lysosome	5/1207	15/23416	0.000701959	0.00730037	0.00571419	Map1lc3b/Lamp2/Map1lc3a/Fth1/Ftl1	5
GO:0000792	GO:0000792	heterochromatin	13/1207	92/23416	0.000856672	0.00876333	0.00685929	H2afz/Bend3/Kdm4c/Sirt1/Hdac1/Snai1/Cbx3/Phc2/Atrx/Suv39h1/Rnf20/Baz1b/Tcp1	13
GO:0001726	GO:0001726	ruffle	17/1207	142/23416	0.00104613	0.0104118	0.0081496	Tnfrsf12a/Apc/Rab5a/Pip5k1a/Rock1/Rps3/Als2/Trpm7/Nf2/Arf4/Nme2/Tesc/Cttn/Arf6/Arhgap1/Myo1c/Nckap1	17
GO:1904949	GO:1904949	ATPase complex	13/1207	94/23416	0.00105119	0.0104118	0.0081496	Yy1/Baz1a/Mta2/Ruvbl1/Mcrs1/Hdac1/Chrac1/Srcap/Arid2/Dpf2/Smarcc1/Vcp/Cecr2	13
GO:0031461	GO:0031461	cullin-RING ubiquitin ligase complex	18/1207	155/23416	0.00107999	0.0104621	0.00818895	Fbxo15/Rnf7/Fbxo6/Vhl/Arih2/Fbxo45/Cul3/Ddb1/Klhl21/Ube2c/Zyg11b/Fbxw11/Usp47/Dcaf10/Zswim4/Depdc5/Cand1/Dda1	18
GO:0017053	GO:0017053	transcriptional repressor complex	12/1207	83/23416	0.0010898	0.0104621	0.00818895	Dr1/C1d/Mta2/Gata1/Rcor2/Sirt1/Hdac1/Rest/Ddx20/Rcor1/Rbbp8/Suv39h1	12
GO:0005819	GO:0005819	spindle	26/1207	262/23416	0.00110769	0.0104727	0.00819725	Cul3/Tpr/Rangap1/Sac3d1/Cdk1/Rps3/Tubgcp6/Cdc14b/Klhl21/Dync1li1/Haus2/Mapk14/Cbx3/Dynll1/Ska1/Kat2a/Cttn/Racgap1/Ska3/Nde1/Stag2/Tpt1/Espl1/Nek2/Rif1/Rock2	26
GO:0005742	GO:0005742	mitochondrial outer membrane translocase complex	4/1207	10/23416	0.00114832	0.0106948	0.00837111	Tomm20/Tomm5/Tomm22/Tomm40	4
GO:0000307	GO:0000307	cyclin-dependent protein kinase holoenzyme complex	8/1207	42/23416	0.00119944	0.0110066	0.00861517	Cdk9/Ccna2/Cdk1/Cdkn2d/Ccnjl/Ccne1/Ccnd3/Cdk12	8
GO:0005847	GO:0005847	mRNA cleavage and polyadenylation specificity factor complex	5/1207	17/23416	0.00132695	0.0120002	0.00939287	Pip5k1a/Cstf2t/Cpsf6/Csnk1a1/Ssu72	5
GO:0070461	GO:0070461	SAGA-type complex	6/1207	25/23416	0.00140765	0.0125482	0.00982181	Atxn7l3/Taf2/Taf5l/Kat2a/Usp22/Hcfc1	6
GO:0016363	GO:0016363	nuclear matrix	12/1207	87/23416	0.0016532	0.0145295	0.0113727	Yy1/Ruvbl1/Nufip1/Akap8/Prkcd/Ahctf1/Xpot/Rad21/Hnrnpm/Stag2/Jak2/Sf3b1	12
GO:0005759	GO:0005759	mitochondrial matrix	25/1207	259/23416	0.00200092	0.0173413	0.0135735	Cdk1/Mdh2/Rps3/Mrpl51/Mrpl43/Clpx/Sod2/Glrx2/Grsf1/Mrpl49/Mars2/Ivd/Tbrg4/Pde12/Mrpl20/Mcl1/C1qbp/Mrpl40/Mrps30/Mrpl34/Tfb2m/Mrps7/Tefm/Dna2/Trmt10c	25
GO:1902911	GO:1902911	protein kinase complex	13/1207	101/23416	0.0020451	0.0174814	0.0136832	Cdk9/Ccna2/Cdk1/Cdkn2d/Ulk1/Ccnjl/Ccne1/Rb1cc1/Sesn2/Ccnd3/Chuk/Atg13/Cdk12	13
GO:0005697	GO:0005697	telomerase holoenzyme complex	5/1207	19/23416	0.00228802	0.0192936	0.0151016	Smg5/Nhp2/Wrap53/Gnl3l/Snrpb	5
GO:0008278	GO:0008278	cohesin complex	4/1207	12/23416	0.00249129	0.0207275	0.016224	Wapl/Rad21/Stag2/Smc1b	4
GO:0000421	GO:0000421	autophagosome membrane	5/1207	20/23416	0.00292258	0.0239959	0.0187822	Map1lc3b/Lamp2/Ulk1/Map1lc3a/Gabarapl2	5
GO:0010494	GO:0010494	cytoplasmic stress granule	9/1207	59/23416	0.00306024	0.024695	0.0193294	Rock1/Pabpc1/G3bp1/Larp1/Pabpc4/Ddx3x/Vcp/Rc3h1/Ybx1	9
GO:0030686	GO:0030686	90S preribosome	6/1207	29/23416	0.00316603	0.024695	0.0193294	Imp3/Noc2l/Tbl3/Fbxw9/Bop1/Wdr36	6
GO:0044665	GO:0044665	MLL1/2 complex	6/1207	29/23416	0.00316603	0.024695	0.0193294	Ruvbl1/Kansl1/Mcrs1/Hcfc1/Mga/Senp3	6
GO:0071339	GO:0071339	MLL1 complex	6/1207	29/23416	0.00316603	0.024695	0.0193294	Ruvbl1/Kansl1/Mcrs1/Hcfc1/Mga/Senp3	6
GO:0000779	GO:0000779	condensed chromosome, centromeric region	8/1207	49/23416	0.00333397	0.0256839	0.0201035	Ahctf1/Crebbp/Cbx3/Ska1/Ncapd2/Atrx/Ska3/Spc25	8
GO:0035145	GO:0035145	exon-exon junction complex	5/1207	21/23416	0.00367502	0.027966	0.0218897	Srsf1/Rbm8a2/Rbm8a/Casc3/Eif4a3	5
GO:0044798	GO:0044798	nuclear transcription factor complex	20/1207	202/23416	0.00402354	0.0302493	0.0236769	Nfatc3/Taf4b/Hnrnpab/Gtf3c5/Taf1d/Gm5435/Gtf3c1/Taf2/Rarg/Crebbp/Med14/Gtf3c6/Taf5l/Kat2a/Med26/Med25/Atf4/Nfyb/Ercc4/E2f1	20
GO:0090568	GO:0090568	nuclear transcriptional repressor complex	6/1207	31/23416	0.00449514	0.0326829	0.0255818	Dr1/Mta2/Sirt1/Hdac1/Ddx20/Suv39h1	6
GO:0000784	GO:0000784	nuclear chromosome, telomeric region	10/1207	74/23416	0.00455178	0.0326829	0.0255818	Brca2/Tox4/Terf2ip/Hmbox1/Dclre1b/Atrx/Nabp1/Smchd1/Ercc4/Dna2	10
GO:0005721	GO:0005721	pericentric heterochromatin	5/1207	22/23416	0.00455676	0.0326829	0.0255818	Kdm4c/Snai1/Cbx3/Atrx/Baz1b	5
GO:0031307	GO:0031307	integral component of mitochondrial outer membrane	5/1207	22/23416	0.00455676	0.0326829	0.0255818	Tomm20/Fundc1/Bnip3/Tomm40/Rhot1	5
GO:0016234	GO:0016234	inclusion body	10/1207	76/23416	0.00551495	0.039106	0.0306093	Bag5/Tpr/Rangap1/Gpx1/Prkcq/Tdp2/Urb2/Atf4/Cabin1/Hdac6	10
GO:0031306	GO:0031306	intrinsic component of mitochondrial outer membrane	5/1207	23/23416	0.00557906	0.0391161	0.0306172	Tomm20/Fundc1/Bnip3/Tomm40/Rhot1	5
GO:0031462	GO:0031462	Cul2-RING ubiquitin ligase complex	4/1207	15/23416	0.00606982	0.0420841	0.0329403	Rnf7/Vhl/Zyg11b/Zswim4	4
GO:0032279	GO:0032279	asymmetric synapse	32/1207	390/23416	0.00667838	0.0457946	0.0358446	Kpna1/Rps19/Rpl6/Eif4g2/Slc30a1/Fbxo45/Rps13/Rps3/Rtn4/Rps25/Rpl12/Als2/Usp50/Sos1/Pak2/Rpl8/Bnip3/Rplp0/Map3k7/Rpl23/Dcc/Rpl10a/Rpl30/Drosha/Plekha5/Rpl18a/Fxr2/Efnb2/Gsk3b/Nf1/Arfgef2/Rps14	32
GO:0005720	GO:0005720	nuclear heterochromatin	7/1207	44/23416	0.00683648	0.0463692	0.0362943	H2afz/Bend3/Sirt1/Cbx3/Atrx/Suv39h1/Tcp1	7
GO:0005643	GO:0005643	nuclear pore	9/1207	67/23416	0.00722345	0.048467	0.0379364	Kpna1/Tpr/Rangap1/Ahctf1/Xpot/Ranbp2/Kpna6/Myo1c/Ran	9

## Sheet: Zygote_2-cell_Down_BP
	ID	Description	GeneRatio	BgRatio	pvalue	p.adjust	qvalue	geneID	Count
GO:0000819	GO:0000819	sister chromatid segregation	28/866	181/23239	1.69721e-10	7.66802e-07	6.89069e-07	Ncapg/Pttg1/Pinx1/Bub3/Nusap1/Ttk/Ccnb1/Nsmce2/Bub1b/Ncaph/Champ1/Plk1/Lcmt1/Kif23/Ndc80/Smc4/Rab11a/Nuf2/Sfpq/Esco2/Top2b/Phf13/Mad1l1/Ctnnb1/Birc5/Tacc3/Pibf1/Mad2l1	28
GO:0098813	GO:0098813	nuclear chromosome segregation	33/866	256/23239	5.69342e-10	1.28614e-06	1.15576e-06	Ncapg/Pttg1/Pinx1/Bub3/Nusap1/Ttk/Ccnb1/Nsmce2/Bub1b/Ncaph/Champ1/Plk1/Lcmt1/Kif23/Ndc80/Brip1/Smc4/Rab11a/Nuf2/Sfpq/Esco2/Cpeb1/Top2b/Cenpq/Spice1/Phf13/Mad1l1/Ctnnb1/Birc5/Tacc3/Actr2/Pibf1/Mad2l1	33
GO:0000070	GO:0000070	mitotic sister chromatid segregation	24/866	148/23239	1.28251e-09	1.93146e-06	1.73566e-06	Ncapg/Pttg1/Pinx1/Bub3/Nusap1/Ttk/Ccnb1/Nsmce2/Bub1b/Ncaph/Champ1/Plk1/Lcmt1/Kif23/Ndc80/Smc4/Rab11a/Nuf2/Phf13/Mad1l1/Birc5/Tacc3/Pibf1/Mad2l1	24
GO:0007059	GO:0007059	chromosome segregation	36/866	311/23239	1.88444e-09	2.12847e-06	1.9127e-06	Ncapg/Nup37/Pttg1/Pinx1/Bub3/Nusap1/Ttk/Ccnb1/Nsmce2/Bub1b/Ncaph/Champ1/Plk1/Lcmt1/Kif23/Ndc80/Brip1/Smc4/Rab11a/Nuf2/Sfpq/Esco2/Cpeb1/Rad18/Top2b/Cenpq/Spice1/Cenph/Phf13/Mad1l1/Ctnnb1/Birc5/Tacc3/Actr2/Pibf1/Mad2l1	36
GO:0140014	GO:0140014	mitotic nuclear division	32/866	272/23239	1.00657e-08	9.09535e-06	8.17333e-06	Ncapg/Pttg1/Chek1/Ccno/Pinx1/Bub3/Nusap1/Npm2/Ttk/Ccnb1/Nsmce2/Bub1b/Ncaph/Champ1/Plk1/Lcmt1/Ccng2/Kif23/Ndc80/Smc4/Rab11a/Nuf2/Spice1/Phf13/Mad1l1/Birc5/Tacc3/Aurka/Map9/Pibf1/Tom1l1/Mad2l1	32
GO:0000280	GO:0000280	nuclear division	41/866	417/23239	1.78428e-08	1.34356e-05	1.20736e-05	Ncapg/Aspm/Tdrd12/Pttg1/Chek1/Ccno/Pinx1/Bub3/Nusap1/Npm2/Ttk/Ccnb1/Nsmce2/Bub1b/Ncaph/Champ1/Plk1/Lcmt1/Ccng2/Kif23/Ndc80/Asz1/Nanos2/Brip1/Smc4/Rab11a/Nuf2/Cpeb1/Dazl/Top2b/Spice1/Phf13/Mad1l1/Birc5/Tacc3/Aurka/Map9/Actr2/Pibf1/Tom1l1/Mad2l1	41
GO:0048285	GO:0048285	organelle fission	43/866	464/23239	4.48992e-08	2.89792e-05	2.60416e-05	Ncapg/Aspm/Tdrd12/Pttg1/Chek1/Ccno/Pinx1/Bub3/Nusap1/Npm2/Ttk/Ccnb1/Nsmce2/Bub1b/Ncaph/Champ1/Plk1/Lcmt1/Ccng2/Kif23/Ndc80/Asz1/Nanos2/Brip1/Smc4/Rab11a/Nuf2/Cpeb1/Dazl/Top2b/Pex11b/Spice1/Phf13/Mad1l1/Birc5/Tacc3/Aurka/Map9/Actr2/Pibf1/Tom1l1/Mtfr2/Mad2l1	43
GO:0006397	GO:0006397	mRNA processing	41/866	439/23239	7.47234e-08	4.06714e-05	3.65484e-05	Zcchc8/Snrnp27/Prpf6/Papolg/Cpsf4l/Cir1/Smu1/Snrpb2/Nsrp1/Mtpap/Smn1/Ccnb1/Pabpc1l/Nono/Noct/Srek1ip1/Sf3a1/Rbm39/Snrnp70/Rnf219/Magohb/Ern1/Plrg1/Slbp/Fip1l1/Lsm3/Sfpq/Gemin8/Gpatch1/Cpeb1/Hnrnpa3/Tardbp/Sart3/Rbm7/Prpf38b/Crnkl1/Esrp1/Cpsf3/U2af1l4/Rbm26/Sf3a3	41
GO:0045839	GO:0045839	negative regulation of mitotic nuclear division	13/866	55/23239	8.3154e-08	4.06714e-05	3.65484e-05	Pttg1/Chek1/Bub3/Ttk/Ccnb1/Bub1b/Plk1/Lcmt1/Ndc80/Mad1l1/Birc5/Tom1l1/Mad2l1	13
GO:0006281	GO:0006281	DNA repair	41/866	442/23239	9.00207e-08	4.06714e-05	3.65484e-05	Pttg1/Chek1/Sfr1/Tdp1/Dclre1a/Hmgn1/Nono/Nsmce2/Aplf/Nsmce1/Taok3/Trp53/Brip1/Rpa1/Uhrf1/Sirt6/Smc4/Sfpq/Esco2/Trp53bp1/Rad18/Usp3/Top2b/Timeless/Poli/Pms1/Actr8/Swi5/Ube2w/Ddb2/Rnf168/Smug1/Actr2/Rnf8/Pcna/Pcna-ps2/Mum1/Nfrkb/Nhej1/Xrcc6/Exo5	41
GO:0051784	GO:0051784	negative regulation of nuclear division	14/866	66/23239	1.14476e-07	4.70186e-05	4.22522e-05	Pttg1/Chek1/Bub3/Ttk/Ccnb1/Bub1b/Plk1/Lcmt1/Ndc80/Nanos2/Mad1l1/Birc5/Tom1l1/Mad2l1	14
GO:0010965	GO:0010965	regulation of mitotic sister chromatid separation	13/866	58/23239	1.6306e-07	6.13919e-05	5.51685e-05	Pttg1/Bub3/Ttk/Ccnb1/Nsmce2/Bub1b/Plk1/Lcmt1/Ndc80/Mad1l1/Birc5/Tacc3/Mad2l1	13
GO:0031577	GO:0031577	spindle checkpoint	11/866	41/23239	2.04868e-07	7.11994e-05	6.39818e-05	Bub3/Ttk/Ccnb1/Bub1b/Plk1/Lcmt1/Ndc80/Mad1l1/Birc5/Aurka/Mad2l1	11
GO:2000816	GO:2000816	negative regulation of mitotic sister chromatid separation	11/866	42/23239	2.6826e-07	8.65713e-05	7.77953e-05	Pttg1/Bub3/Ttk/Ccnb1/Bub1b/Plk1/Lcmt1/Ndc80/Mad1l1/Birc5/Mad2l1	11
GO:0051306	GO:0051306	mitotic sister chromatid separation	13/866	62/23239	3.74075e-07	0.000106191	9.54258e-05	Pttg1/Bub3/Ttk/Ccnb1/Nsmce2/Bub1b/Plk1/Lcmt1/Ndc80/Mad1l1/Birc5/Tacc3/Mad2l1	13
GO:0033045	GO:0033045	regulation of sister chromatid segregation	15/866	83/23239	3.76062e-07	0.000106191	9.54258e-05	Pttg1/Bub3/Ttk/Ccnb1/Nsmce2/Bub1b/Plk1/Lcmt1/Ndc80/Sfpq/Mad1l1/Ctnnb1/Birc5/Tacc3/Mad2l1	15
GO:1905819	GO:1905819	negative regulation of chromosome separation	11/866	44/23239	4.48965e-07	0.000119319	0.000107223	Pttg1/Bub3/Ttk/Ccnb1/Bub1b/Plk1/Lcmt1/Ndc80/Mad1l1/Birc5/Mad2l1	11
GO:1905818	GO:1905818	regulation of chromosome separation	13/866	64/23239	5.52135e-07	0.000136567	0.000122722	Pttg1/Bub3/Ttk/Ccnb1/Nsmce2/Bub1b/Plk1/Lcmt1/Ndc80/Mad1l1/Birc5/Tacc3/Mad2l1	13
GO:0033048	GO:0033048	negative regulation of mitotic sister chromatid segregation	11/866	45/23239	5.74317e-07	0.000136567	0.000122722	Pttg1/Bub3/Ttk/Ccnb1/Bub1b/Plk1/Lcmt1/Ndc80/Mad1l1/Birc5/Mad2l1	11
GO:0007094	GO:0007094	mitotic spindle assembly checkpoint	10/866	37/23239	6.83936e-07	0.000147144	0.000132228	Bub3/Ttk/Ccnb1/Bub1b/Plk1/Lcmt1/Ndc80/Mad1l1/Birc5/Mad2l1	10
GO:0071173	GO:0071173	spindle assembly checkpoint	10/866	37/23239	6.83936e-07	0.000147144	0.000132228	Bub3/Ttk/Ccnb1/Bub1b/Plk1/Lcmt1/Ndc80/Mad1l1/Birc5/Mad2l1	10
GO:0006888	GO:0006888	ER to Golgi vesicle-mediated transport	18/866	124/23239	8.06537e-07	0.000165633	0.000148843	Arf1/Pdcd6/Stx18/Sec22b/Ergic2/Sec22a/Mia3/Trappc3l/Stx17/Copb1/Trappc5/Kdelr2/Insig1/Copb2/Sec13/Sar1b/Lman1/Trappc1	18
GO:0033046	GO:0033046	negative regulation of sister chromatid segregation	11/866	47/23239	9.20575e-07	0.000180833	0.000162501	Pttg1/Bub3/Ttk/Ccnb1/Bub1b/Plk1/Lcmt1/Ndc80/Mad1l1/Birc5/Mad2l1	11
GO:0007091	GO:0007091	metaphase/anaphase transition of mitotic cell cycle	12/866	57/23239	1.00267e-06	0.000188753	0.000169619	Bub3/Ttk/Ccnb1/Nsmce2/Bub1b/Plk1/Lcmt1/Ndc80/Mad1l1/Birc5/Tacc3/Mad2l1	12
GO:0071174	GO:0071174	mitotic spindle checkpoint	10/866	39/23239	1.16663e-06	0.000210834	0.000189461	Bub3/Ttk/Ccnb1/Bub1b/Plk1/Lcmt1/Ndc80/Mad1l1/Birc5/Mad2l1	10
GO:1902850	GO:1902850	microtubule cytoskeleton organization involved in mitosis	18/866	128/23239	1.29617e-06	0.000225235	0.000202402	Nusap1/Ccnb1/Ralbp1/Plk1/Kif23/Sbds/Ndc80/Rab11a/Nuf2/Aurkc/Spice1/Tacc3/Aurka/Map9/Poc1a/Pibf1/Pafah1b1/Rae1	18
GO:0033047	GO:0033047	regulation of mitotic sister chromatid segregation	13/866	69/23239	1.36782e-06	0.000228882	0.00020568	Pttg1/Bub3/Ttk/Ccnb1/Nsmce2/Bub1b/Plk1/Lcmt1/Ndc80/Mad1l1/Birc5/Tacc3/Mad2l1	13
GO:0051983	GO:0051983	regulation of chromosome segregation	16/866	104/23239	1.4874e-06	0.000240003	0.000215673	Pttg1/Bub3/Ttk/Ccnb1/Nsmce2/Bub1b/Plk1/Lcmt1/Ndc80/Sfpq/Rad18/Mad1l1/Ctnnb1/Birc5/Tacc3/Mad2l1	16
GO:0051985	GO:0051985	negative regulation of chromosome segregation	11/866	50/23239	1.7827e-06	0.000268713	0.000241473	Pttg1/Bub3/Ttk/Ccnb1/Bub1b/Plk1/Lcmt1/Ndc80/Mad1l1/Birc5/Mad2l1	11
GO:0044784	GO:0044784	metaphase/anaphase transition of cell cycle	12/866	60/23239	1.79024e-06	0.000268713	0.000241473	Bub3/Ttk/Ccnb1/Nsmce2/Bub1b/Plk1/Lcmt1/Ndc80/Mad1l1/Birc5/Tacc3/Mad2l1	12
GO:0045841	GO:0045841	negative regulation of mitotic metaphase/anaphase transition	10/866	41/23239	1.92282e-06	0.000268713	0.000241473	Bub3/Ttk/Ccnb1/Bub1b/Plk1/Lcmt1/Ndc80/Mad1l1/Birc5/Mad2l1	10
GO:0007052	GO:0007052	mitotic spindle organization	16/866	106/23239	1.92812e-06	0.000268713	0.000241473	Ccnb1/Ralbp1/Plk1/Kif23/Sbds/Ndc80/Rab11a/Nuf2/Aurkc/Spice1/Tacc3/Aurka/Map9/Poc1a/Pibf1/Rae1	16
GO:0051304	GO:0051304	chromosome separation	15/866	94/23239	1.96271e-06	0.000268713	0.000241473	Pttg1/Bub3/Ttk/Ccnb1/Nsmce2/Bub1b/Ncaph/Plk1/Lcmt1/Ndc80/Top2b/Mad1l1/Birc5/Tacc3/Mad2l1	15
GO:0008380	GO:0008380	RNA splicing	33/866	361/23239	2.21831e-06	0.000294774	0.000264892	Clk1/Zcchc8/Snrnp27/Prpf6/Cir1/Smu1/Snrpb2/Nsrp1/Smn1/Nono/Srek1ip1/Sf3a1/Rbm39/Snrnp70/Rnf219/Rnf113a2/Magohb/Ern1/Plrg1/Lsm3/Sfpq/Gemin8/Tmbim6/Hnrnpa3/Tardbp/Sart3/Rbm7/Prpf38b/Crnkl1/Esrp1/Cpsf3/U2af1l4/Sf3a3	33
GO:0007051	GO:0007051	spindle organization	20/866	161/23239	2.48396e-06	0.000320644	0.000288139	Aspm/Ccnb1/Ralbp1/Mapre1/Plk1/Kif23/Sbds/Ndc80/Mapre2/Rab11a/Nuf2/Aurkc/Haus3/Spice1/Tacc3/Aurka/Map9/Poc1a/Pibf1/Rae1	20
GO:1902100	GO:1902100	negative regulation of metaphase/anaphase transition of cell cycle	10/866	43/23239	3.07365e-06	0.000385744	0.00034664	Bub3/Ttk/Ccnb1/Bub1b/Plk1/Lcmt1/Ndc80/Mad1l1/Birc5/Mad2l1	10
GO:0010498	GO:0010498	proteasomal protein catabolic process	37/866	436/23239	3.19862e-06	0.000390565	0.000350972	Skp1a/Rnf34/Psmd10/Psmc5/Psmd1/Psma7/Psma2/H13/Ufl1/Csnk1e/Nr1d1/Maea/Nedd4l/Plk1/Glmn/Rnf185/Pias1/Rhbdf1/Hsp90b1/Mapk8/Siah1b/Sec61b/Btrc/Bfar/Kctd5/Ubxn4/Psmf1/Ube2w/Usp14/Trim13/Sec13/Aurka/Os9/Jkamp/Tbl1xr1/Derl3/Sdf2	37
GO:0030071	GO:0030071	regulation of mitotic metaphase/anaphase transition	11/866	53/23239	3.28496e-06	0.000390565	0.000350972	Bub3/Ttk/Ccnb1/Nsmce2/Bub1b/Plk1/Lcmt1/Ndc80/Mad1l1/Birc5/Mad2l1	11
GO:0015931	GO:0015931	nucleobase-containing compound transport	21/866	180/23239	3.87387e-06	0.000448773	0.00040328	Nup37/Ssb/Nup85/Slc35a1/Nup88/Ddx19a/Magohb/Slbp/Nup54/Sfpq/Igf2bp2/Stau1/Cpeb1/Eny2/Hnrnpa3/Slc35a4/Sec13/Slc35a5/Rbm26/G3bp2/Rae1	21
GO:0048193	GO:0048193	Golgi vesicle transport	26/866	257/23239	4.2639e-06	0.000481607	0.000432785	Arf1/Pdcd6/Nsf/Stx18/Golga7/Sec22b/Ergic2/Sec22a/Mia3/Trappc3l/Copz1/Tbc1d14/Golph3/Stx17/Steap2/Copb1/Trappc5/Cnst/Kdelr2/Insig1/Copb2/Sec13/Snx2/Sar1b/Lman1/Trappc1	26
GO:1902099	GO:1902099	regulation of metaphase/anaphase transition of cell cycle	11/866	56/23239	5.79526e-06	0.000638609	0.000573872	Bub3/Ttk/Ccnb1/Nsmce2/Bub1b/Plk1/Lcmt1/Ndc80/Mad1l1/Birc5/Mad2l1	11
GO:0061640	GO:0061640	cytoskeleton-dependent cytokinesis	14/866	92/23239	7.59457e-06	0.000816959	0.000734142	Arf1/Chmp3/Bbs4/Nusap1/Ckap2/Mitd1/Plk1/Kif23/Anln/Birc5/Map9/Actr2/Bin3/Cfl1	14
GO:0006302	GO:0006302	double-strand break repair	22/866	204/23239	8.32796e-06	0.000875016	0.000786314	Chek1/Sfr1/Tdp1/Dclre1a/Nsmce2/Aplf/Nsmce1/Trp53/Brip1/Rpa1/Sirt6/Sfpq/Esco2/Trp53bp1/Top2b/Timeless/Swi5/Rnf168/Actr2/Rnf8/Nhej1/Xrcc6	22
GO:0000281	GO:0000281	mitotic cytokinesis	13/866	81/23239	8.79849e-06	0.000903445	0.000811861	Arf1/Chmp3/Bbs4/Nusap1/Ckap2/Mitd1/Plk1/Kif23/Anln/Birc5/Map9/Bin3/Cfl1	13
GO:0000075	GO:0000075	cell cycle checkpoint	20/866	176/23239	9.73695e-06	0.000956338	0.000859392	Wdr76/Chek1/Bub3/Ttk/Ccnb1/Bub1b/Nae1/Plk1/Lcmt1/Ndc80/Taok3/Trp53/Ppp1r10/Trp53bp1/Top2b/Timeless/Mad1l1/Birc5/Aurka/Mad2l1	20
GO:0007088	GO:0007088	regulation of mitotic nuclear division	20/866	176/23239	9.73695e-06	0.000956338	0.000859392	Pttg1/Chek1/Ccno/Bub3/Nusap1/Npm2/Ttk/Ccnb1/Nsmce2/Bub1b/Plk1/Lcmt1/Ccng2/Ndc80/Mad1l1/Birc5/Tacc3/Map9/Tom1l1/Mad2l1	20
GO:0050657	GO:0050657	nucleic acid transport	18/866	148/23239	1.05102e-05	0.000969984	0.000871655	Nup37/Ssb/Nup85/Nup88/Ddx19a/Magohb/Slbp/Nup54/Sfpq/Igf2bp2/Stau1/Cpeb1/Eny2/Hnrnpa3/Sec13/Rbm26/G3bp2/Rae1	18
GO:0050658	GO:0050658	RNA transport	18/866	148/23239	1.05102e-05	0.000969984	0.000871655	Nup37/Ssb/Nup85/Nup88/Ddx19a/Magohb/Slbp/Nup54/Sfpq/Igf2bp2/Stau1/Cpeb1/Eny2/Hnrnpa3/Sec13/Rbm26/G3bp2/Rae1	18
GO:0051783	GO:0051783	regulation of nuclear division	22/866	207/23239	1.052e-05	0.000969984	0.000871655	Pttg1/Chek1/Ccno/Bub3/Nusap1/Npm2/Ttk/Ccnb1/Nsmce2/Bub1b/Plk1/Lcmt1/Ccng2/Ndc80/Nanos2/Dazl/Mad1l1/Birc5/Tacc3/Map9/Tom1l1/Mad2l1	22
GO:0010639	GO:0010639	negative regulation of organelle organization	33/866	391/23239	1.2045e-05	0.00108838	0.000978052	Pttg1/Chek1/Parl/Rdx/H1foo/Pinx1/Bub3/Psmd10/Dnmt1/Bbs4/Ttk/Ckap2/Ccnb1/Usp30/Bub1b/Sec22b/Mapre1/Plk1/Lcmt1/Ndc80/Nanos2/Trp53/Atg5/Slc35f6/Insig1/Mad1l1/Birc5/Arhgap28/Camsap3/Tom1l1/Pfn1/Cfl1/Mad2l1	33
GO:0043161	GO:0043161	proteasome-mediated ubiquitin-dependent protein catabolic process	32/866	374/23239	1.23503e-05	0.00109409	0.000983181	Skp1a/Rnf34/Psmd10/Psmc5/Psmd1/Psma7/Psma2/Ufl1/Csnk1e/Maea/Nedd4l/Plk1/Glmn/Rnf185/Pias1/Hsp90b1/Mapk8/Siah1b/Sec61b/Btrc/Bfar/Kctd5/Ubxn4/Ube2w/Usp14/Trim13/Sec13/Aurka/Os9/Jkamp/Tbl1xr1/Derl3	32
GO:0006163	GO:0006163	purine nucleotide metabolic process	35/866	428/23239	1.30706e-05	0.00113563	0.00102051	Ak2/Fbp1/Hif1a/Nudt7/Ndufa10/Ccnb1/Bpgm/Adss/Pdhx/Gmps/Cox7a2l/Pid1/Ndufa8/Trp53/Hmgcs1/Sirt6/Hmgcr/Nudt5/Dcakd/Acot9/Atp5a1/Gnai3/Dlat/Dguok/Suclg1/Taz/Mthfd1/Entpd1/Hsd17b4/Ada/Sucla2/Sdha/Efl1/Sdhc/Dld	35
GO:0000910	GO:0000910	cytokinesis	18/866	151/23239	1.38938e-05	0.00116245	0.00104461	Arf1/Chmp3/Bbs4/Nusap1/Ckap2/Mitd1/Plk1/Kif23/Rab11a/Aurkc/Anln/Prc1/Birc5/Aurka/Map9/Actr2/Bin3/Cfl1	18
GO:0051236	GO:0051236	establishment of RNA localization	18/866	151/23239	1.38938e-05	0.00116245	0.00104461	Nup37/Ssb/Nup85/Nup88/Ddx19a/Magohb/Slbp/Nup54/Sfpq/Igf2bp2/Stau1/Cpeb1/Eny2/Hnrnpa3/Sec13/Rbm26/G3bp2/Rae1	18
GO:0051321	GO:0051321	meiotic cell cycle	28/866	309/23239	1.50471e-05	0.00123605	0.00111075	Aspm/Tdrd12/Pttg1/H1foo/Bub3/Npm2/Ttk/Xlr3c/Xlr3a/Bub1b/Ncaph/Plk1/Asz1/Nanos2/Brip1/Rpa1/Smc4/Nuf2/Tdrd1/Cpeb1/Aurkc/Dazl/Top2b/Rbm7/Xlr3b/Aurka/Actr2/Xlr4c	28
GO:0051303	GO:0051303	establishment of chromosome localization	12/866	75/23239	2.0025e-05	0.00161559	0.00145181	Pinx1/Ccnb1/Champ1/Ndc80/Rab11a/Nuf2/Cenpq/Spice1/Mad1l1/Birc5/Actr2/Pibf1	12
GO:0042176	GO:0042176	regulation of protein catabolic process	31/866	366/23239	2.04775e-05	0.00162311	0.00145858	Hsp90aa1/Serpine2/Rdx/Nsf/Psmd10/Psmd1/Nkd1/Ufl1/Csnk1e/Banp/Dedd/Nedd4l/Sec22b/Plk1/Glmn/Pias1/Rhbdf1/Mapk8/Laptm4b/Btrc/Sumo3/Cdh1/Pdcl3/Psmf1/Epha4/Usp14/Aurka/Os9/Rgn/Derl3/Mad2l1	31
GO:0006403	GO:0006403	RNA localization	19/866	171/23239	2.21963e-05	0.00170086	0.00152844	Nup37/Prpf6/Ssb/Nup85/Nup88/Ddx19a/Magohb/Slbp/Nup54/Sfpq/Igf2bp2/Stau1/Cpeb1/Eny2/Hnrnpa3/Sec13/Rbm26/G3bp2/Rae1	19
GO:0045930	GO:0045930	negative regulation of mitotic cell cycle	23/866	233/23239	2.22969e-05	0.00170086	0.00152844	Pttg1/Chek1/Pinx1/Bub3/Ttk/Ccnb1/Bub1b/Nae1/Plk1/Lcmt1/Tpra1/Ndc80/Taok3/Fbxo7/Trp53/Ppp1r10/Top2b/Btg4/Mad1l1/Ctnnb1/Birc5/Tom1l1/Mad2l1	23
GO:1901991	GO:1901991	negative regulation of mitotic cell cycle phase transition	17/866	142/23239	2.25878e-05	0.00170086	0.00152844	Chek1/Pinx1/Bub3/Ttk/Ccnb1/Bub1b/Nae1/Plk1/Lcmt1/Tpra1/Ndc80/Taok3/Fbxo7/Trp53/Mad1l1/Birc5/Mad2l1	17
GO:0050000	GO:0050000	chromosome localization	12/866	76/23239	2.29828e-05	0.00170224	0.00152968	Pinx1/Ccnb1/Champ1/Ndc80/Rab11a/Nuf2/Cenpq/Spice1/Mad1l1/Birc5/Actr2/Pibf1	12
GO:0007346	GO:0007346	regulation of mitotic cell cycle	38/866	499/23239	2.79249e-05	0.00203492	0.00182863	Pttg1/Chek1/Rdx/Ccno/Pinx1/Bub3/Nusap1/Npm2/Ttk/Ccnb1/Nsmce2/Bub1b/Nae1/Plk1/Lcmt1/Ccng2/Meis2/Tpra1/Usp2/Ndc80/Taok3/Fbxo7/Trp53/Plrg1/Rab11a/Ppp1r10/Top2b/Btg4/Mad1l1/Ctnnb1/Birc5/Tacc3/Map9/Pafah1b1/Tom1l1/Rae1/Mta3/Mad2l1	38
GO:0007093	GO:0007093	mitotic cell cycle checkpoint	16/866	131/23239	3.04351e-05	0.00218263	0.00196137	Chek1/Bub3/Ttk/Ccnb1/Bub1b/Nae1/Plk1/Lcmt1/Ndc80/Taok3/Trp53/Ppp1r10/Top2b/Mad1l1/Birc5/Mad2l1	16
GO:0010948	GO:0010948	negative regulation of cell cycle process	22/866	222/23239	3.14306e-05	0.0022188	0.00199388	Pttg1/Chek1/Pinx1/Bub3/Ttk/Ccnb1/Bub1b/Nae1/Plk1/Lcmt1/Tpra1/Ndc80/Nanos2/Taok3/Fbxo7/Trp53/Ppp1r10/Mad1l1/Birc5/Rassf1/Tom1l1/Mad2l1	22
GO:0051028	GO:0051028	mRNA transport	14/866	105/23239	3.53646e-05	0.00245811	0.00220893	Nup37/Nup85/Nup88/Ddx19a/Magohb/Slbp/Nup54/Igf2bp2/Cpeb1/Eny2/Hnrnpa3/Sec13/G3bp2/Rae1	14
GO:0072521	GO:0072521	purine-containing compound metabolic process	36/866	468/23239	3.65404e-05	0.00250136	0.00224779	Ak2/Fbp1/Hif1a/Nudt7/Ndufa10/Ccnb1/Bpgm/Mtap/Adss/Pdhx/Gmps/Cox7a2l/Pid1/Ndufa8/Trp53/Hmgcs1/Sirt6/Hmgcr/Nudt5/Dcakd/Acot9/Atp5a1/Gnai3/Dlat/Dguok/Suclg1/Taz/Mthfd1/Entpd1/Hsd17b4/Ada/Sucla2/Sdha/Efl1/Sdhc/Dld	36
GO:0044380	GO:0044380	protein localization to cytoskeleton	10/866	57/23239	4.31938e-05	0.00286985	0.00257893	Bbs4/Ttk/Ccdc14/Mapre1/Champ1/Mapre2/Hook3/Anln/Aurka/Pibf1	10
GO:0051310	GO:0051310	metaphase plate congression	10/866	57/23239	4.31938e-05	0.00286985	0.00257893	Pinx1/Ccnb1/Champ1/Ndc80/Rab11a/Nuf2/Cenpq/Spice1/Mad1l1/Pibf1	10
GO:0033044	GO:0033044	regulation of chromosome organization	29/866	346/23239	4.53178e-05	0.00296733	0.00266652	Pttg1/Chek1/H1foo/Pinx1/Bub3/Dnmt1/Eed/Ttk/Ccnb1/Nsmce2/Bub1b/Plk1/Lcmt1/Rtf1/Spty2d1/Ndc80/Trp53/Sirt6/Sfpq/Cct8/Atg5/Ppp1r10/Sart3/Mad1l1/Ctnnb1/Birc5/Tacc3/Rps6ka5/Mad2l1	29
GO:0006732	GO:0006732	coenzyme metabolic process	27/866	312/23239	4.75237e-05	0.00306731	0.00275637	Ldhb/Fbp1/Hif1a/Nudt7/Dnmt1/Mat2b/Mmadhc/Bpgm/Pdhx/Trp53/G6pdx/Hmgcs1/Sirt6/Hmgcr/Dcakd/Fpgs/Acot9/Dlat/Suclg1/Mthfd1/Hsd17b4/Rgn/Me1/Sucla2/Mdh1/Pcbd1/Dld	27
GO:0034976	GO:0034976	response to endoplasmic reticulum stress	21/866	213/23239	5.08698e-05	0.00323704	0.00290889	H13/Ufl1/Rnf185/Hsp90b1/Ern1/Trp53/Sec61b/Tmbim6/Bfar/Dnajc3/Ubxn4/Creb3l4/Usp14/Trim13/Sec13/Anks4b/Atf6/Os9/Jkamp/Derl3/Sdf2	21
GO:0009150	GO:0009150	purine ribonucleotide metabolic process	32/866	403/23239	5.35049e-05	0.00335743	0.00301708	Ak2/Fbp1/Hif1a/Nudt7/Ndufa10/Ccnb1/Bpgm/Adss/Pdhx/Gmps/Cox7a2l/Pid1/Ndufa8/Trp53/Hmgcs1/Sirt6/Hmgcr/Nudt5/Dcakd/Acot9/Atp5a1/Gnai3/Dlat/Suclg1/Taz/Entpd1/Hsd17b4/Sucla2/Sdha/Efl1/Sdhc/Dld	32
GO:0051186	GO:0051186	cofactor metabolic process	36/866	481/23239	6.42704e-05	0.00397772	0.00357449	Akr1b3/Ldhb/Prdx2/Fbp1/Sod1/Hif1a/Nudt7/Dnmt1/Mat2b/Mmadhc/Bpgm/Slc7a11/Prdx1/Pdhx/Trp53/G6pdx/Hmgcs1/Sirt6/Hmgcr/Dcakd/Fpgs/Acot9/Txnrd3/Dlat/Ciapin1/Suclg1/Mthfd1/Tmem14c/Hsd17b4/Rgn/Me1/Sucla2/Mdh1/Pcbd1/Urod/Dld	36
GO:0019693	GO:0019693	ribose phosphate metabolic process	33/866	430/23239	7.96086e-05	0.00486043	0.00436771	Ak2/Fbp1/Hif1a/Nudt7/Ndufa10/Ccnb1/Bpgm/Adss/Pdhx/Gmps/Cox7a2l/Pid1/Ndufa8/Trp53/G6pdx/Hmgcs1/Sirt6/Hmgcr/Nudt5/Dcakd/Acot9/Atp5a1/Gnai3/Dlat/Suclg1/Taz/Entpd1/Hsd17b4/Sucla2/Sdha/Efl1/Sdhc/Dld	33
GO:0007292	GO:0007292	female gamete generation	16/866	142/23239	8.1647e-05	0.00491842	0.00441983	Aspm/Oas1d/Plat/Ttk/Ccnb1/Gdf9/Pabpc1l/Ncaph/Plk1/Aurkc/Dazl/Bmpr1b/Nobox/Tdrd5/Ctnnb1/Aurka	16
GO:0009259	GO:0009259	ribonucleotide metabolic process	32/866	413/23239	8.49897e-05	0.0050202	0.00451129	Ak2/Fbp1/Hif1a/Nudt7/Ndufa10/Ccnb1/Bpgm/Adss/Pdhx/Gmps/Cox7a2l/Pid1/Ndufa8/Trp53/Hmgcs1/Sirt6/Hmgcr/Nudt5/Dcakd/Acot9/Atp5a1/Gnai3/Dlat/Suclg1/Taz/Entpd1/Hsd17b4/Sucla2/Sdha/Efl1/Sdhc/Dld	32
GO:1901990	GO:1901990	regulation of mitotic cell cycle phase transition	23/866	254/23239	8.5559e-05	0.0050202	0.00451129	Chek1/Rdx/Pinx1/Bub3/Npm2/Ttk/Ccnb1/Nsmce2/Bub1b/Nae1/Plk1/Lcmt1/Tpra1/Ndc80/Taok3/Fbxo7/Trp53/Plrg1/Rab11a/Mad1l1/Birc5/Mta3/Mad2l1	23
GO:0140013	GO:0140013	meiotic nuclear division	18/866	174/23239	9.26341e-05	0.00536565	0.00482172	Aspm/Tdrd12/Pttg1/Npm2/Ttk/Bub1b/Ncaph/Plk1/Asz1/Nanos2/Brip1/Smc4/Nuf2/Cpeb1/Dazl/Top2b/Aurka/Actr2	18
GO:1901988	GO:1901988	negative regulation of cell cycle phase transition	17/866	159/23239	9.57005e-05	0.0054731	0.00491828	Chek1/Pinx1/Bub3/Ttk/Ccnb1/Bub1b/Nae1/Plk1/Lcmt1/Tpra1/Ndc80/Taok3/Fbxo7/Trp53/Mad1l1/Birc5/Mad2l1	17
GO:0072698	GO:0072698	protein localization to microtubule cytoskeleton	9/866	51/23239	9.90468e-05	0.00559367	0.00502663	Bbs4/Ttk/Ccdc14/Mapre1/Champ1/Mapre2/Hook3/Aurka/Pibf1	9
GO:0036503	GO:0036503	ERAD pathway	12/866	88/23239	0.000101145	0.00564167	0.00506976	H13/Rnf185/Hsp90b1/Sec61b/Ubxn4/Usp14/Trim13/Sec13/Os9/Jkamp/Derl3/Sdf2	12
GO:0007076	GO:0007076	mitotic chromosome condensation	5/866	14/23239	0.00010739	0.00591693	0.00531712	Ncapg/Nusap1/Ncaph/Smc4/Phf13	5
GO:0006099	GO:0006099	tricarboxylic acid cycle	7/866	31/23239	0.000116977	0.00632584	0.00568458	Fh1/Dlat/Suclg1/Sucla2/Sdha/Mdh1/Sdhc	7
GO:0071459	GO:0071459	protein localization to chromosome, centromeric region	6/866	22/23239	0.000117612	0.00632584	0.00568458	Bub3/Ttk/Bub1b/Champ1/Ndc80/Cenpq	6
GO:0030433	GO:0030433	ubiquitin-dependent ERAD pathway	10/866	65/23239	0.000136888	0.00724093	0.0065069	Rnf185/Hsp90b1/Sec61b/Ubxn4/Usp14/Trim13/Sec13/Os9/Jkamp/Derl3	10
GO:0007080	GO:0007080	mitotic metaphase plate congression	8/866	42/23239	0.000137831	0.00724093	0.0065069	Pinx1/Ccnb1/Champ1/Ndc80/Rab11a/Nuf2/Mad1l1/Pibf1	8
GO:1903362	GO:1903362	regulation of cellular protein catabolic process	21/866	229/23239	0.000143361	0.0074449	0.0066902	Hsp90aa1/Rdx/Psmd10/Ufl1/Csnk1e/Plk1/Glmn/Pias1/Rhbdf1/Mapk8/Laptm4b/Btrc/Sumo3/Pdcl3/Psmf1/Epha4/Usp14/Aurka/Os9/Rgn/Derl3	21
GO:0006513	GO:0006513	protein monoubiquitination	10/866	66/23239	0.000156015	0.00792684	0.00712328	Skp1a/Pcgf1/Pdcd6/Nedd4l/Uhrf1/Rad18/Tsg101/Ube2w/Ddb2/Rnf168	10
GO:0060700	GO:0060700	regulation of ribonuclease activity	5/866	15/23239	0.000156151	0.00792684	0.00712328	Oas1e/Oas1c/Oas1d/Oas1h/Tmbim6	5
GO:0045787	GO:0045787	positive regulation of cell cycle	28/866	355/23239	0.000171598	0.00861424	0.007741	Chek1/Rdx/Ccno/Psmd10/Chmp3/Nusap1/Npm2/Ccnb1/Nsmce2/Ccng2/Meis2/Kif23/Usp2/Ndc80/Trp53/Plrg1/Rab11a/Sfpq/Ppp1r10/Dazl/Birc5/Aurka/Insm1/Rassf1/Poc1a/Pafah1b1/Mta3/Mad2l1	28
GO:0031124	GO:0031124	mRNA 3'-end processing	9/866	55/23239	0.000181232	0.00899787	0.00808574	Papolg/Cpsf4l/Mtpap/Ccnb1/Pabpc1l/Slbp/Fip1l1/Cpeb1/Cpsf3	9
GO:0072594	GO:0072594	establishment of protein localization to organelle	29/866	378/23239	0.00021208	0.010415	0.00935918	Txnip/Parl/Hsp90aa1/Nup85/Sec62/Nup88/Uqcrc2/Fbxo7/Ywhaz/Nfkbia/Trp53/Ppp3r1/Cox18/Kpna7/Sec61b/Nup54/Rab11a/Cct8/Ncoa4/Mterf4/Cdh1/Rab3gap1/Spcs2/Tsg101/Pex13/Snx16/Immp1l/Fgf9/Cfl1	29
GO:1901976	GO:1901976	regulation of cell cycle checkpoint	7/866	34/23239	0.000217118	0.0105477	0.00947847	Wdr76/Ccnb1/Lcmt1/Ndc80/Ppp1r10/Aurka/Mad2l1	7
GO:0090231	GO:0090231	regulation of spindle checkpoint	5/866	16/23239	0.000220177	0.0105826	0.00950979	Ccnb1/Lcmt1/Ndc80/Aurka/Mad2l1	5
GO:0031123	GO:0031123	RNA 3'-end processing	12/866	97/23239	0.00025869	0.0123028	0.0110556	Ssb/Papolg/Cpsf4l/Mtpap/Ccnb1/Pabpc1l/Exosc9/Slbp/Fip1l1/Cpeb1/Cpsf3/Trnt1	12
GO:0006101	GO:0006101	citrate metabolic process	7/866	35/23239	0.000262744	0.0123654	0.0111119	Fh1/Dlat/Suclg1/Sucla2/Sdha/Mdh1/Sdhc	7
GO:0034502	GO:0034502	protein localization to chromosome	11/866	84/23239	0.00028036	0.0130584	0.0117347	Pinx1/Bub3/Ttk/Bub1b/Champ1/Plk1/Ndc80/Rpa1/Cct8/Esco2/Cenpq	11
GO:0034501	GO:0034501	protein localization to kinetochore	5/866	17/23239	0.000302381	0.0139404	0.0125272	Bub3/Ttk/Champ1/Ndc80/Cenpq	5
GO:0051225	GO:0051225	spindle assembly	12/866	99/23239	0.000313469	0.0143056	0.0128554	Aspm/Mapre1/Plk1/Kif23/Mapre2/Rab11a/Aurkc/Haus3/Spice1/Aurka/Map9/Pibf1	12
GO:0045786	GO:0045786	negative regulation of cell cycle	32/866	445/23239	0.000327965	0.0148175	0.0133154	Wdr76/Pttg1/Chek1/Pinx1/Bub3/Ttk/Ccnb1/Bub1b/Nae1/Plk1/Lcmt1/Tpra1/Ndc80/Nanos2/Taok3/Fbxo7/Ern1/Trp53/Ppp1r10/Trp53bp1/Top2b/Tsg101/Btg4/Timeless/Mad1l1/Ctnnb1/Birc5/Aurka/Insm1/Rassf1/Tom1l1/Mad2l1	32
GO:1900407	GO:1900407	regulation of cellular response to oxidative stress	11/866	86/23239	0.000345216	0.0153507	0.0137945	Sod1/Hif1a/Ralbp1/Nono/Slc7a11/Fbxo7/Trp53/Sfpq/Glrx/Ctnnb1/Rgn	11
GO:2001251	GO:2001251	negative regulation of chromosome organization	15/866	145/23239	0.000346562	0.0153507	0.0137945	Pttg1/H1foo/Pinx1/Bub3/Dnmt1/Ttk/Ccnb1/Bub1b/Plk1/Lcmt1/Ndc80/Atg5/Mad1l1/Birc5/Mad2l1	15
GO:0009141	GO:0009141	nucleoside triphosphate metabolic process	23/866	280/23239	0.000357719	0.015691	0.0141004	Ak2/Fbp1/Hif1a/Ndufa10/Ccnb1/Bpgm/Cox7a2l/Pid1/Ndufa8/Trp53/Sirt6/Nudt5/Atp5a1/Gnai3/Dguok/Suclg1/Taz/Entpd1/Ada/Sdha/Efl1/Sdhc/Dld	23
GO:1903046	GO:1903046	meiotic cell cycle process	18/866	194/23239	0.0003618	0.0157174	0.0141241	Aspm/Tdrd12/Pttg1/Npm2/Ttk/Bub1b/Ncaph/Plk1/Asz1/Nanos2/Brip1/Smc4/Nuf2/Cpeb1/Dazl/Top2b/Aurka/Actr2	18
GO:1901617	GO:1901617	organic hydroxy compound biosynthetic process	19/866	211/23239	0.000367269	0.0158031	0.0142011	Akr1b3/Ldhb/Sod1/Nsdhl/Slc7a11/Nr1d1/Trp53/G6pdx/Ip6k2/Sptlc1/Hmgcs1/Hmgcr/Srd5a3/Insig1/Hsd17b7/Msmo1/Insm1/Ippk/Pcbd1	19
GO:0009144	GO:0009144	purine nucleoside triphosphate metabolic process	22/866	263/23239	0.000371101	0.0158173	0.0142139	Ak2/Fbp1/Hif1a/Ndufa10/Ccnb1/Bpgm/Cox7a2l/Pid1/Ndufa8/Trp53/Sirt6/Nudt5/Atp5a1/Gnai3/Dguok/Taz/Entpd1/Ada/Sdha/Efl1/Sdhc/Dld	22
GO:0032069	GO:0032069	regulation of nuclease activity	6/866	27/23239	0.000397927	0.0168022	0.0150989	Oas1e/Oas1c/Oas1d/Oas1h/Tmbim6/Pcna	6
GO:0051188	GO:0051188	cofactor biosynthetic process	20/866	230/23239	0.000410563	0.0170673	0.0153371	Fbp1/Sod1/Hif1a/Mat2b/Mmadhc/Bpgm/Slc7a11/Pdhx/Trp53/G6pdx/Sirt6/Dcakd/Fpgs/Dlat/Mthfd1/Tmem14c/Rgn/Pcbd1/Urod/Dld	20
GO:0006310	GO:0006310	DNA recombination	22/866	265/23239	0.00041176	0.0170673	0.0153371	Chek1/Sfr1/H1foo/Nono/Nsmce2/Aplf/Nsmce1/Brip1/Rpa1/Sirt6/Sfpq/Trp53bp1/Icosl/Rad18/Top2b/Actr8/Swi5/Rnf168/Actr2/Rnf8/Nfrkb/Xrcc6	22
GO:0048599	GO:0048599	oocyte development	8/866	49/23239	0.000418482	0.0171882	0.0154458	Ccnb1/Gdf9/Pabpc1l/Aurkc/Dazl/Tdrd5/Ctnnb1/Aurka	8
GO:1903050	GO:1903050	regulation of proteolysis involved in cellular protein catabolic process	18/866	197/23239	0.000435433	0.0176261	0.0158393	Psmd10/Ufl1/Csnk1e/Plk1/Glmn/Pias1/Rhbdf1/Mapk8/Btrc/Sumo3/Pdcl3/Psmf1/Epha4/Usp14/Aurka/Os9/Rgn/Derl3	18
GO:1901987	GO:1901987	regulation of cell cycle phase transition	23/866	284/23239	0.000436946	0.0176261	0.0158393	Chek1/Rdx/Pinx1/Bub3/Npm2/Ttk/Ccnb1/Nsmce2/Bub1b/Nae1/Plk1/Lcmt1/Tpra1/Ndc80/Taok3/Fbxo7/Trp53/Plrg1/Rab11a/Mad1l1/Birc5/Mta3/Mad2l1	23
GO:0006605	GO:0006605	protein targeting	21/866	249/23239	0.000448229	0.0179212	0.0161045	Arl6ip1/Parl/Hsp90aa1/Sec62/Uqcrc2/Golga7/Fbxo7/Ywhaz/Sec61b/Nup54/Ncoa4/Mterf4/Spcs2/Ywhab/Pex13/Snx16/Ywhae/Os9/Immp1l/Ywhag/Zdhhc24	21
GO:1903201	GO:1903201	regulation of oxidative stress-induced cell death	10/866	75/23239	0.0004536	0.0179769	0.0161545	Sod1/Hif1a/Ralbp1/Nono/Slc7a11/Fbxo7/Trp53/Sfpq/Glrx/Ctnnb1	10
GO:0044770	GO:0044770	cell cycle phase transition	28/866	381/23239	0.000537774	0.0210404	0.0189074	Chek1/Rdx/Pinx1/Bub3/Npm2/Ttk/Ccnb1/Nsmce2/Bub1b/Arpp19/Nae1/Plk1/Lcmt1/Tpra1/Pias1/Ndc80/Taok3/Fbxo7/Trp53/Plrg1/Slbp/Rab11a/Timeless/Mad1l1/Birc5/Tacc3/Mta3/Mad2l1	28
GO:0000956	GO:0000956	nuclear-transcribed mRNA catabolic process	12/866	105/23239	0.000540213	0.0210404	0.0189074	Gspt2/Ssb/Dcp1a/Mtpap/Noct/Nanos2/Magohb/Exosc9/Lsm3/Edc4/Polr2g/Auh	12
GO:0044772	GO:0044772	mitotic cell cycle phase transition	26/866	344/23239	0.000552089	0.0211887	0.0190408	Chek1/Rdx/Pinx1/Bub3/Npm2/Ttk/Ccnb1/Nsmce2/Bub1b/Arpp19/Nae1/Plk1/Lcmt1/Tpra1/Pias1/Ndc80/Taok3/Fbxo7/Trp53/Plrg1/Rab11a/Mad1l1/Birc5/Tacc3/Mta3/Mad2l1	26
GO:0016126	GO:0016126	sterol biosynthetic process	8/866	51/23239	0.000553402	0.0211887	0.0190408	Sod1/Nsdhl/G6pdx/Hmgcs1/Hmgcr/Insig1/Hsd17b7/Msmo1	8
GO:0034655	GO:0034655	nucleobase-containing compound catabolic process	29/866	401/23239	0.000559035	0.0212245	0.019073	Gspt2/Ssb/Fbp1/Hif1a/Nudt7/Nlrp5/Dcp1a/Mtpap/Bpgm/Pycrl/Noct/Nanos2/Magohb/Trp53/Exosc9/Sirt6/Lsm3/Nudt5/Enpp5/Tardbp/Rnaset2a/Edc4/Entpd1/Rgn/Ada/Polr2g/Auh/Mgat1/Prr5l	29
GO:0009167	GO:0009167	purine ribonucleoside monophosphate metabolic process	21/866	254/23239	0.000582013	0.0219128	0.0196915	Ak2/Fbp1/Hif1a/Ndufa10/Ccnb1/Bpgm/Adss/Gmps/Cox7a2l/Pid1/Ndufa8/Trp53/Sirt6/Nudt5/Atp5a1/Taz/Entpd1/Ada/Sdha/Sdhc/Dld	21
GO:0009126	GO:0009126	purine nucleoside monophosphate metabolic process	21/866	255/23239	0.000612576	0.0225861	0.0202965	Ak2/Fbp1/Hif1a/Ndufa10/Ccnb1/Bpgm/Adss/Gmps/Cox7a2l/Pid1/Ndufa8/Trp53/Sirt6/Nudt5/Atp5a1/Taz/Entpd1/Ada/Sdha/Sdhc/Dld	21
GO:0032527	GO:0032527	protein exit from endoplasmic reticulum	7/866	40/23239	0.000619672	0.0225861	0.0202965	H13/Hsp90b1/Sec61b/Insig1/Sar1b/Os9/Derl3	7
GO:0072350	GO:0072350	tricarboxylic acid metabolic process	7/866	40/23239	0.000619672	0.0225861	0.0202965	Fh1/Dlat/Suclg1/Sucla2/Sdha/Mdh1/Sdhc	7
GO:0048477	GO:0048477	oogenesis	11/866	92/23239	0.000619893	0.0225861	0.0202965	Aspm/Ccnb1/Gdf9/Pabpc1l/Aurkc/Dazl/Bmpr1b/Nobox/Tdrd5/Ctnnb1/Aurka	11
GO:0046165	GO:0046165	alcohol biosynthetic process	13/866	122/23239	0.00063514	0.0229565	0.0206294	Akr1b3/Sod1/Nsdhl/G6pdx/Ip6k2/Sptlc1/Hmgcs1/Hmgcr/Srd5a3/Insig1/Hsd17b7/Ippk/Pcbd1	13
GO:0009161	GO:0009161	ribonucleoside monophosphate metabolic process	21/866	258/23239	0.000712761	0.0248389	0.022321	Ak2/Fbp1/Hif1a/Ndufa10/Ccnb1/Bpgm/Adss/Gmps/Cox7a2l/Pid1/Ndufa8/Trp53/Sirt6/Nudt5/Atp5a1/Taz/Entpd1/Ada/Sdha/Sdhc/Dld	21
GO:0034599	GO:0034599	cellular response to oxidative stress	21/866	258/23239	0.000712761	0.0248389	0.022321	Akr1b3/Prdx2/Sod1/Hif1a/Ralbp1/Nono/Slc7a11/Oser1/Prdx1/Mapk8/Fbxo7/Trp53/G6pdx/Sfpq/Glrx/Top2b/Melk/Ctnnb1/Rgn/Prr5l/Cfl1	21
GO:0009994	GO:0009994	oocyte differentiation	8/866	53/23239	0.000721482	0.0248389	0.022321	Ccnb1/Gdf9/Pabpc1l/Aurkc/Dazl/Tdrd5/Ctnnb1/Aurka	8
GO:0008608	GO:0008608	attachment of spindle microtubules to kinetochore	6/866	30/23239	0.000725706	0.0248389	0.022321	Bub3/Ccnb1/Champ1/Ndc80/Nuf2/Mad1l1	6
GO:0036475	GO:0036475	neuron death in response to oxidative stress	6/866	30/23239	0.000725706	0.0248389	0.022321	Hif1a/Ralbp1/Nono/Slc7a11/Fbxo7/Ctnnb1	6
GO:1903203	GO:1903203	regulation of oxidative stress-induced neuron death	6/866	30/23239	0.000725706	0.0248389	0.022321	Hif1a/Ralbp1/Nono/Slc7a11/Fbxo7/Ctnnb1	6
GO:2000144	GO:2000144	positive regulation of DNA-templated transcription, initiation	6/866	30/23239	0.000725706	0.0248389	0.022321	Gtf2b/Psmc5/Sub1/Trp53/Ahr/Ctnnb1	6
GO:0035966	GO:0035966	response to topologically incorrect protein	13/866	124/23239	0.00074129	0.0251017	0.0225571	Hsp90aa1/Rnf185/Ern1/Tmbim6/Bfar/Dnajc3/Ubxn4/Creb3l4/Ube2w/Atf6/Jkamp/Derl3/Sdf2	13
GO:0036473	GO:0036473	cell death in response to oxidative stress	11/866	94/23239	0.000744496	0.0251017	0.0225571	Sod1/Hif1a/Ralbp1/Nono/Slc7a11/Fbxo7/Trp53/Sfpq/Glrx/Melk/Ctnnb1	11
GO:0022412	GO:0022412	cellular process involved in reproduction in multicellular organism	30/866	428/23239	0.000752793	0.0251935	0.0226395	Aspm/Tdrd12/Rnf17/Bbs4/Izumo1r/Ttk/Ccnb1/Gdf9/Xlr3c/Pabpc1l/Xlr3a/Ncaph/Plk1/Asz1/Brip1/Zfp449/Tdrd1/Aurkc/Dazl/Bmpr1b/Nobox/Tdrd5/Ctnnb1/Xlr3b/Aurka/Rnf8/Pafah1b1/Slc26a6/Dld/Xlr4c	30
GO:0051656	GO:0051656	establishment of organelle localization	32/866	468/23239	0.000775155	0.0257511	0.0231406	Ctbp2/Arf1/Pdcd6/Pinx1/Hif1a/Nusap1/Ccnb1/Nup88/Nudc/Champ1/Kif23/Ndc80/Ywhaz/Hook3/Rab11a/Nuf2/Prepl/Tmem230/Rab3gap1/Cenpq/Spice1/Mad1l1/Ctnnb1/Birc5/Tacc3/Uchl1/Sar1b/Actr2/Pibf1/Pafah1b1/Rap1a/Tbc1d23	32
GO:0009636	GO:0009636	response to toxic substance	25/866	334/23239	0.000803601	0.0260888	0.0234441	Slc30a3/Akr1b3/Itpr2/Prdx2/Sod1/Hif1a/Casp8/Cdo1/Usp46/Slc7a11/Oser1/Prdx1/Gk/Mapk8/Fbxo7/Trp53/G6pdx/Glrx/Top2b/Ahr/Timeless/Rgn/Mmp2/Eef1b2/Cfl1	25
GO:0006352	GO:0006352	DNA-templated transcription, initiation	11/866	95/23239	0.000814192	0.0260888	0.0234441	Gtf2b/Gtf2a1l/Psmc5/Sub1/Trp53/Med17/Ahr/Tbpl2/Ctnnb1/Taf9b/Polr2g	11
GO:0043648	GO:0043648	dicarboxylic acid metabolic process	11/866	95/23239	0.000814192	0.0260888	0.0234441	Slc7a11/Adss/Fh1/Fpgs/Suclg1/Mthfd1/Me1/Sucla2/Sdha/Mdh1/Dld	11
GO:0045132	GO:0045132	meiotic chromosome segregation	11/866	95/23239	0.000814192	0.0260888	0.0234441	Pttg1/Ttk/Bub1b/Ncaph/Plk1/Brip1/Smc4/Nuf2/Cpeb1/Top2b/Actr2	11
GO:1902882	GO:1902882	regulation of response to oxidative stress	11/866	95/23239	0.000814192	0.0260888	0.0234441	Sod1/Hif1a/Ralbp1/Nono/Slc7a11/Fbxo7/Trp53/Sfpq/Glrx/Ctnnb1/Rgn	11
GO:0009895	GO:0009895	negative regulation of catabolic process	22/866	279/23239	0.000821972	0.0261526	0.0235014	Rubcn/Rraga/Serpine2/Fbp1/Usp30/Banp/Noct/Dedd/Sec22b/Trp53/Laptm4b/Tbc1d14/Sirt6/Tardbp/Pdcl3/Psmf1/Epha4/Usp14/Os9/Rgn/Derl3/Mad2l1	22
GO:0050792	GO:0050792	regulation of viral process	16/866	176/23239	0.000935882	0.0295686	0.0265712	Oas1e/Gtf2b/Oas1c/Oas1d/Chmp3/Oas1h/Ifitm6/Stau1/Mbl2/Top2b/Tsg101/Tardbp/Trim13/Banf1/Pfn1/Cfl1	16
GO:0034504	GO:0034504	protein localization to nucleus	22/866	282/23239	0.000945699	0.0296713	0.0266634	Txnip/Skp1a/Hsp90aa1/Pinx1/Bbs4/Nup85/Nup88/Banp/Plk1/Dclk2/Nfkbia/Trp53/Ppp3r1/Plrg1/Kpna7/Sec61b/Nup54/Sumo3/Cdh1/Ywhae/Fgf9/Cfl1	22
GO:0006695	GO:0006695	cholesterol biosynthetic process	7/866	43/23239	0.000972246	0.0302938	0.0272229	Sod1/Nsdhl/G6pdx/Hmgcs1/Hmgcr/Insig1/Hsd17b7	7
GO:0001541	GO:0001541	ovarian follicle development	9/866	69/23239	0.00101602	0.0311965	0.028034	Sod1/Oas1d/Umodl1/Bmpr1b/Nobox/Ahr/Esr2/Mmp2/Bmp15	9
GO:0051315	GO:0051315	attachment of mitotic spindle microtubules to kinetochore	4/866	13/23239	0.00104579	0.0311965	0.028034	Champ1/Ndc80/Nuf2/Mad1l1	4
GO:0098787	GO:0098787	mRNA cleavage involved in mRNA processing	4/866	13/23239	0.00104579	0.0311965	0.028034	Cpsf4l/Ern1/Fip1l1/Cpsf3	4
GO:0072522	GO:0072522	purine-containing compound biosynthetic process	19/866	230/23239	0.00105097	0.0311965	0.028034	Ak2/Fbp1/Hif1a/Bpgm/Mtap/Adss/Pdhx/Gmps/Pid1/Trp53/Sirt6/Dcakd/Atp5a1/Dlat/Taz/Mthfd1/Entpd1/Ada/Dld	19
GO:0009108	GO:0009108	coenzyme biosynthetic process	16/866	178/23239	0.00105555	0.0311965	0.028034	Fbp1/Hif1a/Mat2b/Mmadhc/Bpgm/Pdhx/Trp53/G6pdx/Sirt6/Dcakd/Fpgs/Dlat/Mthfd1/Rgn/Pcbd1/Dld	16
GO:0033865	GO:0033865	nucleoside bisphosphate metabolic process	11/866	98/23239	0.00105645	0.0311965	0.028034	Nudt7/Pdhx/Hmgcs1/Hmgcr/Dcakd/Acot9/Dlat/Suclg1/Hsd17b4/Sucla2/Dld	11
GO:0033875	GO:0033875	ribonucleoside bisphosphate metabolic process	11/866	98/23239	0.00105645	0.0311965	0.028034	Nudt7/Pdhx/Hmgcs1/Hmgcr/Dcakd/Acot9/Dlat/Suclg1/Hsd17b4/Sucla2/Dld	11
GO:0034032	GO:0034032	purine nucleoside bisphosphate metabolic process	11/866	98/23239	0.00105645	0.0311965	0.028034	Nudt7/Pdhx/Hmgcs1/Hmgcr/Dcakd/Acot9/Dlat/Suclg1/Hsd17b4/Sucla2/Dld	11
GO:0001824	GO:0001824	blastocyst development	14/866	145/23239	0.00106922	0.0313683	0.0281884	Chek1/Npm2/Rtf1/Sbds/Mfng/Matr3/Cdh1/Txnrd3/Dad1/Ada/Tbl1xr1/Phf6/Gins1/Cnot3	14
GO:0060261	GO:0060261	positive regulation of transcription initiation from RNA polymerase II promoter	5/866	22/23239	0.00110228	0.0321296	0.0288725	Gtf2b/Psmc5/Sub1/Trp53/Ahr	5
GO:1902653	GO:1902653	secondary alcohol biosynthetic process	7/866	44/23239	0.00111952	0.032423	0.0291363	Sod1/Nsdhl/G6pdx/Hmgcs1/Hmgcr/Insig1/Hsd17b7	7
GO:0016241	GO:0016241	regulation of macroautophagy	11/866	99/23239	0.00114933	0.0330743	0.0297215	Rubcn/Hif1a/Nprl2/Usp30/Sec22b/Trp53/Sptlc1/Tbc1d14/Rab3gap1/Gnai3/Trim13	11
GO:0009123	GO:0009123	nucleoside monophosphate metabolic process	21/866	269/23239	0.00121089	0.0346253	0.0311152	Ak2/Fbp1/Hif1a/Ndufa10/Ccnb1/Bpgm/Adss/Gmps/Cox7a2l/Pid1/Ndufa8/Trp53/Sirt6/Nudt5/Atp5a1/Taz/Entpd1/Ada/Sdha/Sdhc/Dld	21
GO:0030261	GO:0030261	chromosome condensation	7/866	45/23239	0.00128373	0.0364774	0.0327796	Ncapg/H1foo/Nusap1/Ccnb1/Ncaph/Smc4/Phf13	7
GO:0051651	GO:0051651	maintenance of location in cell	11/866	101/23239	0.00135528	0.0380101	0.0341569	Aspm/Skp1a/Bbs4/Gm813/Golph3/Kdelr2/Insig1/E330017A01Rik/Os9/Pafah1b1/Pfn1	11
GO:0006301	GO:0006301	postreplication repair	5/866	23/23239	0.00136565	0.0380101	0.0341569	Nsmce1/Rad18/Poli/Pcna/Pcna-ps2	5
GO:1903204	GO:1903204	negative regulation of oxidative stress-induced neuron death	5/866	23/23239	0.00136565	0.0380101	0.0341569	Hif1a/Nono/Slc7a11/Fbxo7/Ctnnb1	5
GO:0016032	GO:0016032	viral process	21/866	272/23239	0.00138994	0.0380101	0.0341569	Oas1e/Gtf2b/Rraga/Ssb/Oas1c/Oas1d/Chmp3/Oas1h/Vta1/Trp53/Ifitm6/Atg5/Stau1/Mbl2/Top2b/Tsg101/Tardbp/Trim13/Banf1/Pfn1/Cfl1	21
GO:0009205	GO:0009205	purine ribonucleoside triphosphate metabolic process	20/866	254/23239	0.00141237	0.0380101	0.0341569	Ak2/Fbp1/Hif1a/Ndufa10/Ccnb1/Bpgm/Cox7a2l/Pid1/Ndufa8/Trp53/Sirt6/Nudt5/Atp5a1/Gnai3/Taz/Entpd1/Sdha/Efl1/Sdhc/Dld	20
GO:0006534	GO:0006534	cysteine metabolic process	4/866	14/23239	0.00142116	0.0380101	0.0341569	Cdo1/Slc7a11/Csad/Mthfd1	4
GO:0030497	GO:0030497	fatty acid elongation	4/866	14/23239	0.00142116	0.0380101	0.0341569	Pecr/Elovl1/Tecr/Elovl5	4
GO:0090266	GO:0090266	regulation of mitotic cell cycle spindle assembly checkpoint	4/866	14/23239	0.00142116	0.0380101	0.0341569	Ccnb1/Lcmt1/Ndc80/Mad2l1	4
GO:1903504	GO:1903504	regulation of mitotic spindle checkpoint	4/866	14/23239	0.00142116	0.0380101	0.0341569	Ccnb1/Lcmt1/Ndc80/Mad2l1	4
GO:0031023	GO:0031023	microtubule organizing center organization	13/866	133/23239	0.0014218	0.0380101	0.0341569	Chek1/Chmp3/Bbs4/Kif3a/Plk1/Mapk8/Haus3/Spice1/Ctnnb1/Aurka/Map9/Poc1a/Pafah1b1	13
GO:0048194	GO:0048194	Golgi vesicle budding	6/866	34/23239	0.00144822	0.0384886	0.0345869	Pdcd6/Mia3/Golph3/Insig1/Sec13/Sar1b	6
GO:0009060	GO:0009060	aerobic respiration	9/866	73/23239	0.00152536	0.0403017	0.0362162	Hif1a/Fh1/Dlat/Suclg1/Sucla2/Sdha/Mdh1/Mtfr2/Sdhc	9
GO:0031647	GO:0031647	regulation of protein stability	20/866	256/23239	0.00155127	0.040748	0.0366172	Hsp90aa1/Pinx1/Nlrp5/Golga7/Nedd4l/Plk1/Naa16/Usp2/Fbxo7/Trp53/Sirt6/Cct8/Btrc/Rab3gap1/Usp3/Epha4/Aurka/Rassf1/Taf9b/Pfn1	20
GO:0007281	GO:0007281	germ cell development	24/866	332/23239	0.00162079	0.0423279	0.038037	Aspm/Rnf17/Bbs4/Ccnb1/Gdf9/Xlr3c/Pabpc1l/Xlr3a/Asz1/Brip1/Tdrd1/Aurkc/Dazl/Bmpr1b/Nobox/Tdrd5/Ctnnb1/Xlr3b/Aurka/Rnf8/Pafah1b1/Slc26a6/Dld/Xlr4c	24
GO:0007098	GO:0007098	centrosome cycle	12/866	119/23239	0.00163761	0.0425215	0.038211	Chek1/Chmp3/Bbs4/Kif3a/Plk1/Mapk8/Haus3/Spice1/Ctnnb1/Aurka/Map9/Poc1a	12
GO:1901293	GO:1901293	nucleoside phosphate biosynthetic process	21/866	276/23239	0.00166351	0.0429471	0.0385934	Ak2/Fbp1/Hif1a/Bpgm/Adss/Pdhx/Gmps/Pid1/Trp53/G6pdx/Sirt6/Cds1/Dcakd/Atp5a1/Dlat/Suclg1/Taz/Mthfd1/Entpd1/Ada/Dld	21
GO:0009199	GO:0009199	ribonucleoside triphosphate metabolic process	20/866	258/23239	0.00170163	0.0436817	0.0392535	Ak2/Fbp1/Hif1a/Ndufa10/Ccnb1/Bpgm/Cox7a2l/Pid1/Ndufa8/Trp53/Sirt6/Nudt5/Atp5a1/Gnai3/Taz/Entpd1/Sdha/Efl1/Sdhc/Dld	20
GO:0006091	GO:0006091	generation of precursor metabolites and energy	25/866	354/23239	0.00180454	0.0460564	0.0413876	Fbp1/Hif1a/Ndufa10/Ccnb1/Bpgm/Nr1d1/Ppp1r3d/Gyg/Cox7a2l/Fh1/Ndufa8/Trp53/Sirt6/Oxct1/Atp5a1/Dlat/Suclg1/Taz/Sucla2/Sdha/Mdh1/Mtfr2/Sdhc/Stbd1/Dld	25
GO:0090407	GO:0090407	organophosphate biosynthetic process	31/866	473/23239	0.00181453	0.0460564	0.0413876	Pnpla3/Ak2/Fbp1/Hif1a/Cept1/Bpgm/Adss/Pdhx/Gk/Gmps/Pid1/Trp53/G6pdx/Ip6k2/Sptlc1/Hmgcs1/Sirt6/Cds1/Dcakd/Atp5a1/Serinc1/Dlat/Suclg1/Taz/Mthfd1/Entpd1/Ippk/Pigk/Ada/Idi1/Dld	31
GO:1903578	GO:1903578	regulation of ATP metabolic process	9/866	75/23239	0.00184756	0.0463843	0.0416822	Fbp1/Hif1a/Ccnb1/Cox7a2l/Pid1/Trp53/Sirt6/Taz/Entpd1	9
GO:0042752	GO:0042752	regulation of circadian rhythm	11/866	105/23239	0.00185825	0.0463843	0.0416822	Nono/Csnk1e/Nr1d1/Noct/Usp2/Mapk8/Trp53/Sfpq/Btrc/Timeless/Ada	11
GO:0045185	GO:0045185	maintenance of protein location	11/866	105/23239	0.00185825	0.0463843	0.0416822	Skp1a/Psmd10/Bbs4/Nfkbia/Golph3/Ywhab/Kdelr2/Insig1/Tacc3/Os9/Pfn1	11
GO:0034660	GO:0034660	ncRNA metabolic process	30/866	455/23239	0.00194788	0.0481493	0.0432683	Riok1/Tdrd12/Ncl/Bms1/Ssb/Mphosph10/Nars/Dedd/Thumpd1/Ints12/Trmt13/Sbds/Asz1/Rnf113a2/Trp53/Exosc9/Farsb/Elp3/Mterf4/Tdrd1/Tfb1m/Osgepl1/Mrpl44/Ice2/Cpsf3/Trit1/Ippk/Sepsecs/Trnt1/Elp2	30
GO:0006790	GO:0006790	sulfur compound metabolic process	20/866	261/23239	0.00195027	0.0481493	0.0432683	Sod1/Nudt7/Dnmt1/Mat2b/Cdo1/Mtap/Slc7a11/Csad/Pdhx/G6pdx/Hmgcs1/Acot9/Txnrd3/Dlat/Ciapin1/Suclg1/Mthfd1/Hsd17b4/Sucla2/Dld	20
GO:0006164	GO:0006164	purine nucleotide biosynthetic process	18/866	225/23239	0.00200819	0.0489825	0.044017	Ak2/Fbp1/Hif1a/Bpgm/Adss/Pdhx/Gmps/Pid1/Trp53/Sirt6/Dcakd/Atp5a1/Dlat/Taz/Mthfd1/Entpd1/Ada/Dld	18
GO:0033522	GO:0033522	histone H2A ubiquitination	5/866	25/23239	0.00202738	0.0489825	0.044017	Skp1a/Pcgf1/Ddb2/Rnf168/Rnf8	5
GO:0090114	GO:0090114	COPII-coated vesicle budding	5/866	25/23239	0.00202738	0.0489825	0.044017	Pdcd6/Mia3/Insig1/Sec13/Sar1b	5
GO:1903579	GO:1903579	negative regulation of ATP metabolic process	5/866	25/23239	0.00202738	0.0489825	0.044017	Fbp1/Pid1/Trp53/Sirt6/Entpd1	5
GO:0006367	GO:0006367	transcription initiation from RNA polymerase II promoter	8/866	62/23239	0.00205179	0.0493084	0.0443099	Gtf2b/Gtf2a1l/Psmc5/Sub1/Trp53/Med17/Ahr/Polr2g	8
GO:0035967	GO:0035967	cellular response to topologically incorrect protein	10/866	91/23239	0.00206433	0.0493474	0.0443449	Rnf185/Ern1/Tmbim6/Bfar/Dnajc3/Creb3l4/Ube2w/Atf6/Derl3/Sdf2	10

## Sheet: Zygote_2-cell_Down_MF
		ID	Description	GeneRatio	BgRatio	pvalue	p.adjust	qvalue	geneID	Count
	GO:0031625	GO:0031625	ubiquitin protein ligase binding	33/848	304/22744	4.31759e-08	1.76921e-05	1.63798e-05	Txnip/Rraga/Hsp90aa1/Rnf34/Hif1a/Scamp3/Casp8/Psmd1/H13/Nae1/Glmn/Pias1/Usp2/Fbxo7/Ywhaz/Nfkbia/Trp53/Laptm4b/Tmbim6/Rad18/Tsg101/Arrdc1/Ywhae/Prkar1a/Ube2w/Uchl1/Aurka/Hltf/Stx8/Atf6/Rnf8/Jkamp/Prr5l	33
	GO:0044389	GO:0044389	ubiquitin-like protein ligase binding	34/848	320/22744	4.58345e-08	1.76921e-05	1.63798e-05	Txnip/Rraga/Hsp90aa1/Rnf34/Hif1a/Scamp3/Casp8/Psmd1/Ccnb1/H13/Nae1/Glmn/Pias1/Usp2/Fbxo7/Ywhaz/Nfkbia/Trp53/Laptm4b/Tmbim6/Rad18/Tsg101/Arrdc1/Ywhae/Prkar1a/Ube2w/Uchl1/Aurka/Hltf/Stx8/Atf6/Rnf8/Jkamp/Prr5l	34
	GO:0016614	GO:0016614	oxidoreductase activity, acting on CH-OH group of donors	17/848	143/22744	2.48837e-05	0.00625233	0.00578856	Ctbp2/Akr1b3/Ldhb/Cryl1/Nsdhl/Rdh11/Miox/Chdh/G6pdx/Hsd3b7/Hmgcr/Hsd17b7/Hibadh/Bdh1/Hsd17b4/Me1/Mdh1	17
	GO:0019787	GO:0019787	ubiquitin-like protein transferase activity	33/848	412/22744	3.48642e-05	0.00625233	0.00578856	E330021D16Rik/Skp1a/Rnf34/Rnf181/Gm5434/Ufl1/Fbxo30/Nsmce2/Rnf25/Maea/Nedd4l/Birc3/Nsmce1/Rnf185/Pias1/Rnf114/Fbxo7/Rnf113a2/Siah1b/Uhrf1/Btrc/Sumo3/Med17/Rad18/Bfar/Pja1/Ube2w/Ddb2/Trim13/Hltf/Fbxo21/Rnf168/Rnf8	33
	GO:0016616	GO:0016616	oxidoreductase activity, acting on the CH-OH group of donors, NAD or NADP as acceptor	16/848	134/22744	4.04943e-05	0.00625233	0.00578856	Ctbp2/Akr1b3/Ldhb/Cryl1/Nsdhl/Rdh11/Miox/G6pdx/Hsd3b7/Hmgcr/Hsd17b7/Hibadh/Bdh1/Hsd17b4/Me1/Mdh1	16
	GO:0016746	GO:0016746	transferase activity, transferring acyl groups	22/848	260/22744	0.000318353	0.0409614	0.0379231	Pnpla3/Gtf2b/Lipt1/Elovl1/Golga7/Pdhx/Naa16/Gnpnat1/Sptlc1/Hmgcs1/Tada1/Cers5/Elp3/Esco2/Elovl5/Dlat/Taz/Osgepl1/Taf9b/Naa11/Naa35/Zdhhc24	22
	GO:0004842	GO:0004842	ubiquitin-protein transferase activity	29/848	392/22744	0.000389721	0.0429807	0.0397926	E330021D16Rik/Skp1a/Rnf34/Rnf181/Fbxo30/Nsmce2/Rnf25/Maea/Nedd4l/Birc3/Nsmce1/Rnf185/Rnf114/Fbxo7/Rnf113a2/Siah1b/Uhrf1/Btrc/Med17/Rad18/Bfar/Pja1/Ube2w/Ddb2/Trim13/Hltf/Fbxo21/Rnf168/Rnf8	29
	GO:0051287	GO:0051287	NAD binding	9/848	62/22744	0.000459932	0.0443835	0.0410913	Ctbp2/Ldhb/Cryl1/Sirt6/Aldh2/Hibadh/Me1/Mdh1/Dld	9

## Sheet: Zygote_2-cell_Down_CC
	ID	Description	GeneRatio	BgRatio	pvalue	p.adjust	qvalue	geneID	Count
GO:0098687	GO:0098687	chromosomal region	40/876	293/23416	1.52132e-12	8.93012e-10	7.12616e-10	Ncapg/Nup37/Chek1/Dclre1a/Pinx1/Bub3/Fbxo28/Dnmt1/Ttk/Nup85/Ccnb1/Nsmce2/Bub1b/Orc4/Champ1/Nsmce1/Plk1/Ndc80/Rpa1/Sirt6/Nuf2/Gpatch11/Esco2/Ppp1r10/Cenpo/Trp53bp1/Aurkc/Cbx1/Cenpq/Cenph/Mad1l1/Birc5/Sec13/Aurka/Rnf8/Pafah1b1/Sycp2l/Phf6/Xrcc6/Mad2l1	40
GO:0000775	GO:0000775	chromosome, centromeric region	30/876	188/23416	1.87834e-11	5.51292e-09	4.39926e-09	Ncapg/Nup37/Pinx1/Bub3/Fbxo28/Dnmt1/Ttk/Nup85/Ccnb1/Bub1b/Champ1/Plk1/Ndc80/Nuf2/Gpatch11/Esco2/Cenpo/Trp53bp1/Aurkc/Cbx1/Cenpq/Cenph/Mad1l1/Birc5/Sec13/Aurka/Pafah1b1/Sycp2l/Phf6/Mad2l1	30
GO:0098827	GO:0098827	endoplasmic reticulum subcompartment	48/876	483/23416	8.58395e-10	1.35044e-07	1.07764e-07	Arl6ip1/Itpr2/Cept1/Apoo/Sec62/Elovl1/H13/Ufl1/Reep2/Sec22b/Ergic2/Mia3/Rnf185/Rhbdf1/Hsp90b1/Rce1/Ern1/Sptlc1/Tecr/Cds1/Sec61b/Hmgcr/Cyb5a/Rpn1/Uba1/Stx17/Tmbim6/Mospd3/Elovl5/Rab3gap1/Spcs2/Serinc1/Dad1/Gnai3/Tusc3/Insig1/Msmo1/Lpin2/Trim13/Anks4b/Atf6/Anxa7/Os9/Pigk/Sec11a/Lman1/Derl3/Sdf2	48
GO:0005789	GO:0005789	endoplasmic reticulum membrane	47/876	470/23416	1.0521e-09	1.35044e-07	1.07764e-07	Arl6ip1/Itpr2/Cept1/Apoo/Sec62/Elovl1/H13/Ufl1/Reep2/Sec22b/Ergic2/Mia3/Rnf185/Rhbdf1/Hsp90b1/Rce1/Ern1/Sptlc1/Tecr/Cds1/Sec61b/Hmgcr/Cyb5a/Rpn1/Uba1/Stx17/Tmbim6/Mospd3/Elovl5/Spcs2/Serinc1/Dad1/Gnai3/Tusc3/Insig1/Msmo1/Lpin2/Trim13/Anks4b/Atf6/Anxa7/Os9/Pigk/Sec11a/Lman1/Derl3/Sdf2	47
GO:0005819	GO:0005819	spindle	33/876	262/23416	1.15029e-09	1.35044e-07	1.07764e-07	Aspm/Pinx1/Nusap1/Ccnb1/Bub1b/Maea/Kif3a/Mapre1/Champ1/Plk1/Kif23/Sbds/Mapre2/Rab11a/Dlgap5/Cpeb1/Aurkc/Haus3/Fam161a/Cbx1/Iqcb1/Spice1/Prc1/Mad1l1/Birc5/Tacc3/Aurka/Map9/Poc1a/Pafah1b1/Tbl1xr1/Rae1/Mad2l1	33
GO:0000776	GO:0000776	kinetochore	22/876	130/23416	2.94187e-09	2.87813e-07	2.29673e-07	Nup37/Pinx1/Bub3/Fbxo28/Ttk/Nup85/Ccnb1/Bub1b/Champ1/Plk1/Ndc80/Nuf2/Gpatch11/Cenpo/Trp53bp1/Cenph/Mad1l1/Birc5/Sec13/Pafah1b1/Phf6/Mad2l1	22
GO:0042175	GO:0042175	nuclear outer membrane-endoplasmic reticulum membrane network	47/876	493/23416	4.90922e-09	4.11673e-07	3.28512e-07	Arl6ip1/Itpr2/Cept1/Apoo/Sec62/Elovl1/H13/Ufl1/Reep2/Sec22b/Ergic2/Mia3/Rnf185/Rhbdf1/Hsp90b1/Rce1/Ern1/Sptlc1/Tecr/Cds1/Sec61b/Hmgcr/Cyb5a/Rpn1/Uba1/Stx17/Tmbim6/Mospd3/Elovl5/Spcs2/Serinc1/Dad1/Gnai3/Tusc3/Insig1/Msmo1/Lpin2/Trim13/Anks4b/Atf6/Anxa7/Os9/Pigk/Sec11a/Lman1/Derl3/Sdf2	47
GO:0000779	GO:0000779	condensed chromosome, centromeric region	12/876	49/23416	1.7948e-07	1.31694e-05	1.0509e-05	Ncapg/Ccnb1/Bub1b/Champ1/Plk1/Ndc80/Nuf2/Cenpo/Aurkc/Birc5/Aurka/Sycp2l	12
GO:0000780	GO:0000780	condensed nuclear chromosome, centromeric region	9/876	28/23416	5.01213e-07	3.26902e-05	2.60865e-05	Ccnb1/Bub1b/Plk1/Ndc80/Nuf2/Cenpo/Aurkc/Aurka/Sycp2l	9
GO:1905368	GO:1905368	peptidase complex	15/876	92/23416	1.55664e-06	9.13745e-05	7.29161e-05	Psmd9/Psmd10/Psmc5/Psmd1/Psma7/Psma2/Tada1/Spcs2/Eny2/Psmc1/Psmf1/Usp14/Taf9b/Sec11a/Sgf29	15
GO:0000793	GO:0000793	condensed chromosome	23/876	208/23416	3.6571e-06	0.000195156	0.000155733	Ncapg/Chek1/Ccnb1/Xlr3c/Xlr3a/Nsmce2/Bub1b/Ncaph/Champ1/Nsmce1/Plk1/Ndc80/Rpa1/Smc4/Nuf2/Cenpo/Aurkc/Birc5/Xlr3b/Aurka/Banf1/Sycp2l/Xlr4c	23
GO:0090734	GO:0090734	site of DNA damage	11/876	57/23416	7.20389e-06	0.00035239	0.000281205	Wdr76/Aplf/Trp53/Rpa1/Esco2/Trp53bp1/Rad18/Cbx1/Rnf168/Actr2/Rnf8	11
GO:0000778	GO:0000778	condensed nuclear chromosome kinetochore	6/876	15/23416	1.00921e-05	0.000455698	0.000363644	Ccnb1/Bub1b/Plk1/Ndc80/Nuf2/Cenpo	6
GO:0005876	GO:0005876	spindle microtubule	10/876	50/23416	1.3454e-05	0.000564108	0.000450153	Nusap1/Kif3a/Plk1/Rab11a/Aurkc/Fam161a/Birc5/Aurka/Map9/Pafah1b1	10
GO:0043209	GO:0043209	myelin sheath	22/876	214/23416	1.88995e-05	0.000739599	0.000590193	Akr1b3/Itpr2/Ldhb/Hsp90aa1/Rdx/Prdx2/Sod1/Nsf/Ndufa10/Uqcrc2/Prdx1/Cdh1/Atp5a1/Dlat/Uchl1/Sucla2/Sdha/Mdh1/Ywhag/Dld/Rap1a/Tubb4b	22
GO:0000777	GO:0000777	condensed chromosome kinetochore	8/876	33/23416	2.24363e-05	0.000823133	0.000656854	Ccnb1/Bub1b/Champ1/Plk1/Ndc80/Nuf2/Cenpo/Birc5	8
GO:0008540	GO:0008540	proteasome regulatory particle, base subcomplex	5/876	11/23416	2.7729e-05	0.000957468	0.000764051	Psmd9/Psmd10/Psmc5/Psmd1/Psmc1	5
GO:0005657	GO:0005657	replication fork	11/876	69/23416	4.73321e-05	0.0015147	0.00120871	Chek1/Rfc3/Dnmt1/Trp53/Plrg1/Rpa1/Uhrf1/Trp53bp1/Rad18/Timeless/Pcna	11
GO:0030496	GO:0030496	midbody	16/876	136/23416	5.06641e-05	0.0015147	0.00120871	Aspm/Rdx/Chmp3/Txndc9/Champ1/Mitd1/Plk1/Kif23/Hsp90b1/Aurkc/Anln/Usp3/Gnai3/Prc1/Birc5/Slc2a1	16
GO:0044431	GO:0044431	Golgi apparatus part	36/876	474/23416	5.16081e-05	0.0015147	0.00120871	Arf1/Acbd3/Tvp23b/Nsf/Scamp3/Apoo/Slc35a1/Golga7/Sec22b/Ergic2/Yipf6/Trappc3l/Rhbdf1/Copz1/Tmem87a/Mfng/Hook3/Rab11a/Golph3/Steap2/Copb1/Trappc5/Cnst/Ica1/Cdh1/Tmem230/Gnai3/Kdelr2/Copb2/Slc35a4/Stx8/Slc35a5/Arfip1/Lman1/Tbc1d23/Ap1m1	36
GO:0072686	GO:0072686	mitotic spindle	13/876	100/23416	9.04797e-05	0.00252912	0.00201822	Aspm/Nusap1/Kif23/Haus3/Fam161a/Iqcb1/Mad1l1/Tacc3/Aurka/Map9/Tbl1xr1/Rae1/Mad2l1	13
GO:0000781	GO:0000781	chromosome, telomeric region	13/876	107/23416	0.000181351	0.00447807	0.00357346	Chek1/Dclre1a/Pinx1/Nsmce2/Orc4/Nsmce1/Rpa1/Sirt6/Ppp1r10/Trp53bp1/Cbx1/Rnf8/Xrcc6	13
GO:0005643	GO:0005643	nuclear pore	10/876	67/23416	0.000183057	0.00447807	0.00357346	Nup37/Nup85/Nup88/Ddx19a/Nup54/Eny2/Mad1l1/Sec13/Rae1/Mad2l1	10
GO:0005681	GO:0005681	spliceosomal complex	18/876	183/23416	0.000184729	0.00447807	0.00357346	Zcchc8/Prpf6/Smu1/Snrpb2/Sf3a1/Snrnp70/Rnf113a2/Magohb/Plrg1/Lsm3/Mfap1b/Gpatch1/Pdcd7/Hnrnpa3/Prpf38b/Crnkl1/U2af1l4/Sf3a3	18
GO:0098798	GO:0098798	mitochondrial protein complex	23/876	267/23416	0.000190718	0.00447807	0.00357346	Dnajc11/Etfa/Dap3/Ndufa10/Apoo/Uqcrc2/Mrpl9/Cox7a2l/Ndufa8/Mrpl48/Mterf4/Atp5a1/Mrpl16/Dlat/Mrps35/Suclg1/Mrpl35/Mrps27/Mrpl44/Immp1l/Mcu/Sdha/Sdhc	23
GO:0005874	GO:0005874	microtubule	31/876	416/23416	0.000233875	0.00500756	0.00399599	Aspm/Nusap1/Dync1i2/Ckap2/Kif17/Nudc/Reep2/Kif3a/Mapre1/Cep57l1/Plk1/Kif23/Mapre2/Dclk2/Hook3/Rab11a/Cct8/Ss18/Aurkc/Tubal3/Haus3/Fam161a/Ttll11/Prc1/Birc5/Aurka/Map9/Rassf1/Camsap3/Pafah1b1/Tubb4b	31
GO:0099568	GO:0099568	cytoplasmic region	33/876	454/23416	0.000235546	0.00500756	0.00399599	Ooep/Ctbp2/Akr1b3/Itpr2/Ncl/Rdx/Sod1/Nlrp5/Mkln1/Kif17/Maea/Kif3a/Mapre1/Myl12a/Bbs5/Usp2/Mapk8/Abhd13/Atg5/Arl13b/Cdh1/Anln/Melk/Prkar1a/Ctnnb1/Tle6/Actr2/Pafah1b1/Ada/Myo5b/Slc2a1/Pfn1/Cfl1	33
GO:0000794	GO:0000794	condensed nuclear chromosome	16/876	155/23416	0.000238861	0.00500756	0.00399599	Chek1/Ccnb1/Xlr3c/Xlr3a/Bub1b/Ncaph/Plk1/Ndc80/Rpa1/Nuf2/Cenpo/Aurkc/Xlr3b/Aurka/Sycp2l/Xlr4c	16
GO:0035770	GO:0035770	ribonucleoprotein granule	19/876	206/23416	0.000284865	0.00576606	0.00460127	Ncl/Dcp1a/Smn1/Psma2/Pabpc1l/Noct/Asz1/Nanos2/Lsm3/Stau1/Tdrd1/Icosl/Usp3/Hnrnpa3/Poli/Tdrd5/Edc4/Polr2g/Cnot3	19
GO:0000139	GO:0000139	Golgi membrane	20/876	224/23416	0.000306278	0.00599283	0.00478223	Arf1/Acbd3/Tvp23b/Scamp3/Apoo/Slc35a1/Golga7/Sec22b/Ergic2/Rhbdf1/Tmem87a/Mfng/Steap2/Ica1/Gnai3/Copb2/Slc35a4/Slc35a5/Arfip1/Lman1	20
GO:0035861	GO:0035861	site of double-strand break	8/876	47/23416	0.000319888	0.00605722	0.00483361	Aplf/Trp53/Esco2/Trp53bp1/Rad18/Rnf168/Actr2/Rnf8	8
GO:0036464	GO:0036464	cytoplasmic ribonucleoprotein granule	18/876	193/23416	0.000356078	0.0065318	0.00521232	Ncl/Dcp1a/Smn1/Psma2/Pabpc1l/Noct/Asz1/Nanos2/Lsm3/Stau1/Tdrd1/Icosl/Usp3/Poli/Tdrd5/Edc4/Polr2g/Cnot3	18
GO:0031228	GO:0031228	intrinsic component of Golgi membrane	8/876	50/23416	0.00049479	0.00880127	0.00702334	Tvp23b/Slc35a1/Golga7/Ergic2/Mfng/Steap2/Slc35a4/Slc35a5	8
GO:0005684	GO:0005684	U2-type spliceosomal complex	10/876	76/23416	0.000520825	0.0089919	0.00717546	Prpf6/Smu1/Snrpb2/Sf3a1/Snrnp70/Rnf113a2/Plrg1/Lsm3/Mfap1b/Crnkl1	10
GO:0098791	GO:0098791	Golgi subcompartment	30/876	419/23416	0.000568843	0.00954031	0.00761309	Arf1/Acbd3/Tvp23b/Nsf/Scamp3/Apoo/Slc35a1/Golga7/Sec22b/Ergic2/Yipf6/Rhbdf1/Tmem87a/Mfng/Rab11a/Golph3/Steap2/Cnst/Ica1/Cdh1/Tmem230/Gnai3/Copb2/Slc35a4/Stx8/Slc35a5/Arfip1/Lman1/Tbc1d23/Ap1m1	30
GO:0000922	GO:0000922	spindle pole	13/876	121/23416	0.000608906	0.00992856	0.00792291	Aspm/Ccnb1/Plk1/Sbds/Rab11a/Dlgap5/Aurkc/Fam161a/Mad1l1/Aurka/Poc1a/Rae1/Mad2l1	13
GO:0000792	GO:0000792	heterochromatin	11/876	92/23416	0.000640304	0.0101583	0.00810626	Zfp57/Wdr76/Mphosph8/Dnmt1/Eed/Uhrf1/Sirt6/Uba1/Esco2/Top2b/Cbx1	11
GO:0000124	GO:0000124	SAGA complex	4/876	12/23416	0.000756966	0.0116931	0.00933103	Tada1/Eny2/Taf9b/Sgf29	4
GO:0005798	GO:0005798	Golgi-associated vesicle	13/876	125/23416	0.000829025	0.0120537	0.00961878	Arf1/Pdcd6/Sec22b/Ergic2/Yipf6/Copz1/Stx17/Steap2/Copb1/Copb2/Sec13/Sar1b/Lman1	13
GO:0030134	GO:0030134	COPII-coated ER to Golgi transport vesicle	8/876	54/23416	0.000840793	0.0120537	0.00961878	Pdcd6/Sec22b/Ergic2/Yipf6/Stx17/Sec13/Sar1b/Lman1	8
GO:0000502	GO:0000502	proteasome complex	9/876	67/23416	0.000841913	0.0120537	0.00961878	Psmd9/Psmd10/Psmc5/Psmd1/Psma7/Psma2/Psmc1/Psmf1/Usp14	9
GO:0034451	GO:0034451	centriolar satellite	6/876	31/23416	0.000889729	0.012435	0.00992304	Bbs4/Ccdc14/Plk1/Bbs5/Hook3/Pibf1	6
GO:1905369	GO:1905369	endopeptidase complex	9/876	68/23416	0.000938685	0.0127383	0.010165	Psmd9/Psmd10/Psmc5/Psmd1/Psma7/Psma2/Psmc1/Psmf1/Usp14	9
GO:0071013	GO:0071013	catalytic step 2 spliceosome	10/876	82/23416	0.000954827	0.0127383	0.010165	Zcchc8/Prpf6/Snrpb2/Sf3a1/Magohb/Plrg1/Lsm3/Gpatch1/Crnkl1/Sf3a3	10
GO:0005838	GO:0005838	proteasome regulatory particle	5/876	22/23416	0.00112172	0.0146322	0.0116764	Psmd9/Psmd10/Psmc5/Psmd1/Psmc1	5
GO:0030176	GO:0030176	integral component of endoplasmic reticulum membrane	13/876	132/23416	0.00137435	0.0175379	0.0139951	Arl6ip1/Sec62/Elovl1/H13/Ergic2/Rce1/Ern1/Tecr/Elovl5/Insig1/Atf6/Pigk/Derl3	13
GO:0000940	GO:0000940	condensed chromosome outer kinetochore	4/876	14/23416	0.00144185	0.0176326	0.0140707	Ccnb1/Bub1b/Plk1/Ndc80	4
GO:0072687	GO:0072687	meiotic spindle	4/876	14/23416	0.00144185	0.0176326	0.0140707	Aspm/Cpeb1/Aurkc/Aurka	4
GO:0051233	GO:0051233	spindle midzone	6/876	34/23416	0.00147745	0.0176992	0.0141238	Mapre1/Plk1/Mapre2/Aurkc/Aurka/Map9	6
GO:0005881	GO:0005881	cytoplasmic microtubule	9/876	73/23416	0.00156698	0.0183964	0.0146801	Ckap2/Reep2/Mapre1/Mapre2/Ss18/Fam161a/Birc5/Map9/Pafah1b1	9
GO:0000784	GO:0000784	nuclear chromosome, telomeric region	9/876	74/23416	0.00172591	0.0198649	0.015852	Dclre1a/Pinx1/Orc4/Rpa1/Sirt6/Ppp1r10/Trp53bp1/Cbx1/Xrcc6	9
GO:0005938	GO:0005938	cell cortex	22/876	296/23416	0.00184619	0.0208406	0.0166306	Ooep/Ctbp2/Itpr2/Ncl/Rdx/Nlrp5/Mkln1/Maea/Mapre1/Myl12a/Usp2/Cdh1/Anln/Melk/Ctnnb1/Tle6/Actr2/Pafah1b1/Myo5b/Slc2a1/Pfn1/Cfl1	22
GO:0030173	GO:0030173	integral component of Golgi membrane	7/876	48/23416	0.00193374	0.0214171	0.0170906	Tvp23b/Slc35a1/Ergic2/Mfng/Steap2/Slc35a4/Slc35a5	7
GO:0022624	GO:0022624	proteasome accessory complex	5/876	25/23416	0.00206239	0.0224189	0.0178901	Psmd9/Psmd10/Psmc5/Psmd1/Psmc1	5
GO:0031227	GO:0031227	intrinsic component of endoplasmic reticulum membrane	13/876	140/23416	0.00233303	0.0247425	0.0197443	Arl6ip1/Sec62/Elovl1/H13/Ergic2/Rce1/Ern1/Tecr/Elovl5/Insig1/Atf6/Pigk/Derl3	13
GO:0044450	GO:0044450	microtubule organizing center part	14/876	157/23416	0.00236044	0.0247425	0.0197443	Bbs4/Ccdc14/Kif3a/Plk1/Bbs5/Hook3/Fam161a/Spice1/Birc5/Sclt1/Poc1a/Agbl2/Pibf1/Cep41	14
GO:0005743	GO:0005743	mitochondrial inner membrane	28/876	425/23416	0.00288976	0.0297594	0.0237478	Ak2/Parl/Dnajc11/Ndufa10/Apoo/Uqcrc2/Vdac3/Chdh/Ghitm/Cox7a2l/Slc25a31/Ndufa8/Abcb7/Cox18/Slc25a35/Fpgs/Atp5a1/Timm8a2/Dhrs1/Suclg1/Nipsnap1/Tmem14c/Bdh1/Immp1l/Mcu/Sdha/Sdhc/Slc25a48	28
GO:0019866	GO:0019866	organelle inner membrane	30/876	467/23416	0.0030344	0.0307103	0.0245065	Ak2/Parl/Dnajc11/Ndufa10/Apoo/Dpy19l1/Uqcrc2/Vdac3/Chdh/Ghitm/Cox7a2l/Slc25a31/Ern1/Ndufa8/Abcb7/Cox18/Slc25a35/Fpgs/Atp5a1/Timm8a2/Dhrs1/Suclg1/Nipsnap1/Tmem14c/Bdh1/Immp1l/Mcu/Sdha/Sdhc/Slc25a48	30
GO:0071005	GO:0071005	U2-type precatalytic spliceosome	5/876	28/23416	0.00347763	0.0340228	0.0271499	Prpf6/Smu1/Snrpb2/Lsm3/Mfap1b	5
GO:0071011	GO:0071011	precatalytic spliceosome	5/876	28/23416	0.00347763	0.0340228	0.0271499	Prpf6/Smu1/Snrpb2/Lsm3/Mfap1b	5
GO:0030120	GO:0030120	vesicle coat	7/876	54/23416	0.00383428	0.0368971	0.0294436	Pdcd6/Ap2s1/Copz1/Copb1/Copb2/Sec13/Sar1b	7
GO:0097431	GO:0097431	mitotic spindle pole	5/876	29/23416	0.00407469	0.0385781	0.030785	Aspm/Fam161a/Mad1l1/Aurka/Rae1	5
GO:0005770	GO:0005770	late endosome	15/876	187/23416	0.00462109	0.0430568	0.034359	Slc30a3/Rubcn/Arf1/Lamtor3/Chmp3/Gnpnat1/Laptm4b/Slc31a2/Rab11a/Tmem230/Tsg101/Snx16/Stx8/Zp2/Rap1a	15
GO:0030867	GO:0030867	rough endoplasmic reticulum membrane	4/876	19/23416	0.00481081	0.0431057	0.034398	Arl6ip1/Sec61b/Uba1/Derl3	4
GO:0030117	GO:0030117	membrane coat	10/876	102/23416	0.00488381	0.0431057	0.034398	Pdcd6/Eps15l1/Ap2s1/Copz1/Copb1/Copb2/Sclt1/Sec13/Sar1b/Ap1m1	10
GO:0048475	GO:0048475	coated membrane	10/876	102/23416	0.00488381	0.0431057	0.034398	Pdcd6/Eps15l1/Ap2s1/Copz1/Copb1/Copb2/Sclt1/Sec13/Sar1b/Ap1m1	10
GO:0000932	GO:0000932	P-body	8/876	71/23416	0.00493341	0.0431057	0.034398	Dcp1a/Psma2/Noct/Nanos2/Lsm3/Edc4/Polr2g/Cnot3	8
GO:0008250	GO:0008250	oligosaccharyltransferase complex	3/876	10/23416	0.00514037	0.0431057	0.034398	Rpn1/Dad1/Tusc3	3
GO:0031080	GO:0031080	nuclear pore outer ring	3/876	10/23416	0.00514037	0.0431057	0.034398	Nup37/Nup85/Sec13	3
GO:0031414	GO:0031414	N-terminal protein acetyltransferase complex	3/876	10/23416	0.00514037	0.0431057	0.034398	Naa16/Naa11/Naa35	3
GO:0030662	GO:0030662	coated vesicle membrane	8/876	72/23416	0.00537258	0.0444184	0.0354455	Pdcd6/Sec22b/Ap2s1/Copz1/Copb1/Copb2/Sec13/Sar1b	8
GO:0005720	GO:0005720	nuclear heterochromatin	6/876	44/23416	0.00565351	0.0460918	0.0367809	Zfp57/Mphosph8/Eed/Uhrf1/Sirt6/Esco2	6
GO:0030135	GO:0030135	coated vesicle	14/876	174/23416	0.00593059	0.0476884	0.038055	Arf1/Pdcd6/Sec22b/Ergic2/Yipf6/Ap2s1/Copz1/Stx17/Steap2/Copb1/Copb2/Sec13/Sar1b/Lman1	14
GO:0030660	GO:0030660	Golgi-associated vesicle membrane	7/876	59/23416	0.00629172	0.0496192	0.0395957	Pdcd6/Sec22b/Copz1/Copb1/Copb2/Sec13/Sar1b	7
GO:0120114	GO:0120114	Sm-like protein family complex	8/876	74/23416	0.00633976	0.0496192	0.0395957	Prpf6/Snrpb2/Smn1/Sf3a1/Snrnp70/Lsm3/Gemin8/Sart3	8
