# Supplementary material for: Dynamic Alternative Splicing During Mouse Preimplantation Embryo Development
Source: Front Bioeng Biotechnol. 2020 Feb 7;8:35. doi: 10.3389/fbioe.2020.00035 (PMC7019016; doi:10.3389/fbioe.2020.00035)
Supplement: Table S9 — Isoform switches (ISs) identified in 836 unique DASGs. [file Table_9.XLSX]

## Sheet: ISsBetweenOocytesAndZygote
iso1	iso2	iso1.mean.ratio	iso2.mean.ratio	before.interval	after.interval	x.value	y.value	prob	diff	before.pval	after.pval	before.t.points	after.t.points	cor
ENSMUSG00000060450.13@ENSMUST00000072376.11	ENSMUSG00000060450.13@ENSMUST00000170811.7	0.9085	0.8604	(1.6257,4.5658]	(4.5658,7]	4.57	12.956	1	61.78	0.00204	0.00415	3	3	0.3245
ENSMUSG00000053253.16@ENSMUST00000138283.1	ENSMUSG00000053253.16@ENSMUST00000181969.7	0.486	0.2568	[1,3.4457]	(3.4457,7]	3.45	5.085	1	75.4	0.03722	0.000895	3	4	0.5832
ENSMUSG00000022019.15@ENSMUST00000168275.7	ENSMUSG00000022019.15@ENSMUST00000169504.7	0.0415	0.0394	[1,2.9137]	(2.9137,6.2006]	2.91	0.929	1	7.21	0.04898	0.00109	2	4	-0.0573
ENSMUSG00000021000.15@ENSMUST00000170992.8	ENSMUSG00000021000.15@ENSMUST00000175912.7	0.9999	0.8478	[1,2.4027]	(2.4027,4.5475]	2.4	15.867	0.833	17.59	0.03069	0.0394	2	2	0.6655
ENSMUSG00000021000.15@ENSMUST00000170992.8	ENSMUSG00000021000.15@ENSMUST00000175912.7	0.9999	0.8478	(2.4027,4.5475]	(4.5475,7]	4.55	5.47	0.833	16.08	0.0394	0.0174	2	3	0.6655
ENSMUSG00000004947.15@ENSMUST00000111142.8	ENSMUSG00000004947.15@ENSMUST00000111144.7	0.146	0.4295	[1,4.5743]	(4.5743,6.032]	4.57	10.844	0.833	127.12	0.01162	0.0472	4	2	0.7181
ENSMUSG00000005882.18@ENSMUST00000136933.7	ENSMUSG00000005882.18@ENSMUST00000152818.7	0.2621	0.0967	[1,2.1842]	(2.1842,7]	2.18	2.314	0.767	18.08	0.04949	4.35e-05	2	5	-0.5443
ENSMUSG00000032407.13@ENSMUST00000079659.11	ENSMUSG00000032407.13@ENSMUST00000191213.6	0.1262	0.3723	[1,2.6043]	(2.6043,6.1812]	2.6	2.917	0.75	11.46	0.03935	0.00103	2	4	0.0254
ENSMUSG00000005882.18@ENSMUST00000146995.7	ENSMUSG00000005882.18@ENSMUST00000152818.7	0.9612	0.0967	[1,2.537]	(2.537,7]	2.54	1.313	0.733	12.14	0.0233	0.00555	2	5	-0.4066
ENSMUSG00000033429.10@ENSMUST00000037205.10	ENSMUSG00000033429.10@ENSMUST00000206194.1	0.1557	0.0842	[1,2.4514]	(2.4514,7]	2.45	5.853	0.7	22.02	0.01906	0.00022	2	5	0.199
ENSMUSG00000005882.18@ENSMUST00000152766.7	ENSMUSG00000005882.18@ENSMUST00000152818.7	0.2908	0.0967	[1,2.5182]	(2.5182,6.9713]	2.52	1.366	0.667	10.66	0.0233	0.0357	2	4	-0.3134
ENSMUSG00000021000.15@ENSMUST00000069430.14	ENSMUSG00000021000.15@ENSMUST00000175877.7	0.2504	0.9825	[1,4.456]	(4.456,6.9999]	4.46	1.71	0.583	13.74	0.01634	0.0121	4	2	-0.1042

## Sheet: ISsBetweenZygoteAnd2-cell
iso1	iso2	iso1.mean.ratio	iso2.mean.ratio	before.interval	after.interval	x.value	y.value	prob	diff	before.pval	after.pval	before.t.points	after.t.points	cor
ENSMUSG00000027620.16@ENSMUST00000126992.7	ENSMUSG00000027620.16@ENSMUST00000146297.7	0.02642	0.07552	[1,4.0068]	(4.0068,7]	4.01	0.205	0.528	28.82	0.030035	0.0125	4	3	-0.2796
ENSMUSG00000005493.15@ENSMUST00000188338.6	ENSMUSG00000005493.15@ENSMUST00000190449.1	0.83909	0.16091	[1,2.7793]	(2.7793,7]	2.78	2.21	0.533	10.43	0.007392	0.034	2	5	-0.2718
ENSMUSG00000030826.19@ENSMUST00000210811.1	ENSMUSG00000030826.19@ENSMUST00000211173.1	0.09369	0.90631	(2.9706,5.6568]	(5.6568,7]	5.66	1.26	0.556	7.98	0.046845	0.0497	3	2	-0.2876
ENSMUSG00000027620.16@ENSMUST00000109584.7	ENSMUSG00000027620.16@ENSMUST00000146297.7	0.1777	0.07552	[1,3.9999]	(3.9999,7]	4	0.000231	0.556	73.17	0.036273	0.0146	3	4	-0.2763
ENSMUSG00000027884.16@ENSMUST00000106613.1	ENSMUSG00000027884.16@ENSMUST00000124384.7	0.28734	0.70768	[1,2.8192]	(2.8192,7]	2.82	10.4	0.567	44.11	0.037341	0.0145	2	5	0.6136
ENSMUSG00000027242.14@ENSMUST00000110602.8	ENSMUSG00000027242.14@ENSMUST00000110603.1	0.08336	0.30007	[1,2.9929]	(2.9929,7]	2.99	1.26	0.567	45.9	0.042344	0.0327	2	5	0.7289
ENSMUSG00000004980.16@ENSMUST00000069949.12	ENSMUSG00000004980.16@ENSMUST00000203220.2	0.19961	0.26482	[1,2.8794]	(2.8794,7]	2.88	3.09	0.567	59.43	0.029934	0.0188	2	5	0.1145
ENSMUSG00000027620.16@ENSMUST00000126992.7	ENSMUSG00000027620.16@ENSMUST00000147098.7	0.02642	0.01821	[1,2.8939]	(2.8939,7]	2.89	0.994	0.633	10.28	0.045797	0.00771	2	5	0.2265
ENSMUSG00000037999.13@ENSMUST00000076623.7	ENSMUSG00000037999.13@ENSMUST00000160620.2	0.78598	0.21402	[1,5.0617]	(5.0617,7]	5.06	4.01	0.633	28.31	0.004584	0.0363	5	2	0.0594
ENSMUSG00000001289.12@ENSMUST00000169637.7	ENSMUSG00000001289.12@ENSMUST00000170627.7	0.26098	0.73902	[1,2.2845]	(2.2845,7]	2.28	11.1	0.633	34.38	0.027235	0.000545	2	5	-0.4298
ENSMUSG00000000563.17@ENSMUST00000118209.7	ENSMUSG00000000563.17@ENSMUST00000133320.1	0.42759	0.56986	[1,3.4524]	(3.4524,7]	3.45	171	0.639	148.95	0.021729	0.0093	3	4	0.7916
ENSMUSG00000020111.15@ENSMUST00000092508.11	ENSMUSG00000020111.15@ENSMUST00000165405.1	0.10095	0.20647	[1,4.7419]	(4.7419,7]	4.74	1.04	0.667	10.24	0.003835	0.0494	4	3	-0.3438
ENSMUSG00000030126.17@ENSMUST00000088896.9	ENSMUSG00000030126.17@ENSMUST00000173031.1	0.37991	0.62009	[1,2.1824]	(2.1824,6.3606]	2.18	8.69	0.667	23.97	0.014656	0.0369	2	4	0.257
ENSMUSG00000061755.10@ENSMUST00000050556.10	ENSMUSG00000061755.10@ENSMUST00000202908.1	0.44918	0.55082	[1,2.319]	(2.319,6.2827]	2.32	11	0.667	33.17	0.028463	0.0139	2	4	-0.1959
ENSMUSG00000015357.10@ENSMUST00000015501.10	ENSMUSG00000015357.10@ENSMUST00000113824.7	0.54043	0.45323	[1,4.458]	(4.458,6.4822]	4.46	69.2	0.667	39.71	0.023909	0.0426	4	2	0.595
ENSMUSG00000004980.16@ENSMUST00000090002.9	ENSMUSG00000004980.16@ENSMUST00000114459.7	0.1216	0.02175	[1,2.8618]	(2.8618,6.753]	2.86	7.11	0.667	57.08	0.005044	0.0207	2	4	-0.3397
ENSMUSG00000039988.14@ENSMUST00000164582.3	ENSMUSG00000039988.14@ENSMUST00000199727.4	0.50053	0.18832	[1,2.2591]	(2.2591,7]	2.26	41.6	0.667	73.16	0.005828	0.000764	2	5	0.5093
ENSMUSG00000025511.14@ENSMUST00000026585.13	ENSMUSG00000025511.14@ENSMUST00000117634.1	0.93772	0.06228	[1,2.0141]	(2.0141,6.9498]	2.01	0.54	0.667	93.64	0.035335	0.000116	2	4	-0.0127
ENSMUSG00000040952.16@ENSMUST00000108429.7	ENSMUSG00000040952.16@ENSMUST00000156372.7	0.35564	0.6105	[1,2.0095]	(2.0095,4.2423]	2.01	7.1	0.667	386.33	0.041074	0.0177	2	2	0.4757
ENSMUSG00000029647.15@ENSMUST00000176505.7	ENSMUSG00000029647.15@ENSMUST00000176553.1	0.14588	0.51093	[1,5.678]	(5.678,7]	5.68	6.14	0.7	52.94	0.006057	0.0123	5	2	0.1154
ENSMUSG00000038759.15@ENSMUST00000043815.15	ENSMUSG00000038759.15@ENSMUST00000201609.3	0.26203	0.60171	(2.4319,4.2585]	(4.2585,7]	4.26	3.98	0.722	11.43	0.026105	0.00255	2	3	-0.6182
ENSMUSG00000019312.10@ENSMUST00000019456.4	ENSMUSG00000019312.10@ENSMUST00000156328.7	0.38116	0.61236	(2.1853,5.3757]	(5.3757,7]	5.38	5.13	0.722	19.93	0.015475	0.0331	3	2	0.3968
ENSMUSG00000043241.14@ENSMUST00000060092.12	ENSMUSG00000043241.14@ENSMUST00000128200.1	0.34311	0.65689	(2.7786,4.6467]	(4.6467,7]	4.65	7.4	0.722	20.47	0.042877	0.00169	2	3	-0.3357
ENSMUSG00000020777.16@ENSMUST00000130229.7	ENSMUSG00000020777.16@ENSMUST00000150549.7	0.2418	0.42802	[1,3.848]	(3.848,7]	3.85	1.68	0.722	25.21	0.0044	0.00193	3	4	-0.2703
ENSMUSG00000052428.10@ENSMUST00000193446.5	ENSMUSG00000052428.10@ENSMUST00000195015.5	0.4507	0.54859	[1,4.2142]	(4.2142,7]	4.21	99.1	0.722	62.86	0.034205	0.000995	4	3	-0.0659
ENSMUSG00000034724.17@ENSMUST00000113005.8	ENSMUSG00000034724.17@ENSMUST00000155901.7	0.34647	0.13142	[1,3.9607]	(3.9607,7]	3.96	5.51	0.722	67.49	0.016153	0.0282	3	4	0.6117
ENSMUSG00000039221.10@ENSMUST00000193168.1	ENSMUSG00000039221.10@ENSMUST00000195827.5	0.27903	0.42254	(2.1547,5.6459]	(5.6459,7]	5.65	101	0.722	277.37	0.010493	0.0481	3	2	0.016
ENSMUSG00000075376.10@ENSMUST00000112934.7	ENSMUSG00000075376.10@ENSMUST00000125619.6	0.87684	0.1184	[1,2.2875]	(2.2875,7]	2.29	0.514	0.733	2.45	0.001988	0.00156	2	5	-0.4454
ENSMUSG00000027951.16@ENSMUST00000107405.5	ENSMUSG00000027951.16@ENSMUST00000121094.7	0.08655	0.40472	[1,5.382]	(5.382,7]	5.38	1.03	0.733	6.75	0.019944	0.0042	5	2	-0.3886
ENSMUSG00000074182.8@ENSMUST00000197604.2	ENSMUSG00000074182.8@ENSMUST00000197940.4	0.06703	0.02349	[1,2.8547]	(2.8547,7]	2.85	4.93	0.733	26.92	0.004556	0.00189	2	5	-0.2548
ENSMUSG00000070837.5@ENSMUST00000207711.1	ENSMUSG00000070837.5@ENSMUST00000208049.1	0.22669	0.64538	[1,2.9241]	(2.9241,7]	2.92	9.32	0.733	82.48	0.000527	0.0036	2	5	-0.042
ENSMUSG00000016481.15@ENSMUST00000191775.1	ENSMUSG00000016481.15@ENSMUST00000193094.5	0.3557	0.21467	[1,2.6967]	(2.6967,6.1945]	2.7	8.92	0.75	19.98	0.049263	0.0122	2	4	-0.0632
ENSMUSG00000036371.6@ENSMUST00000203077.2	ENSMUSG00000036371.6@ENSMUST00000203436.2	0.14753	0.1411	[1,2.5909]	(2.5909,6.0237]	2.59	82.3	0.75	87.42	0.000816	0.0261	2	4	-0.2934
ENSMUSG00000031601.16@ENSMUST00000132032.7	ENSMUSG00000031601.16@ENSMUST00000146280.1	0.26234	0.15435	[1,3.0903]	(3.0903,7]	3.09	56.6	0.778	231.12	0.013095	0.00313	3	4	-0.4766
ENSMUSG00000067367.9@ENSMUST00000154975.7	ENSMUSG00000067367.9@ENSMUST00000202506.1	0.02447	0.09322	[1,2.9139]	(2.9139,7]	2.91	3.96	0.8	73.84	0.00712	0.000638	2	5	0.411
ENSMUSG00000027620.16@ENSMUST00000109584.7	ENSMUSG00000027620.16@ENSMUST00000147098.7	0.1777	0.01821	[1,3.7168]	(3.7168,7]	3.72	1	0.806	55.76	0.038263	0.00355	3	4	0.3307
ENSMUSG00000039988.14@ENSMUST00000040787.12	ENSMUSG00000039988.14@ENSMUST00000199727.4	0.31115	0.18832	[1,3.4878]	(3.4878,7]	3.49	38.5	0.806	60.32	0.016832	0.00294	3	4	-0.5772
ENSMUSG00000035258.14@ENSMUST00000048471.13	ENSMUSG00000035258.14@ENSMUST00000171000.1	0.346	0.61321	[1,2.6784]	(2.6784,4.6926]	2.68	2.84	0.833	5.01	0.030912	0.0433	2	2	0.2642
ENSMUSG00000038759.15@ENSMUST00000043815.15	ENSMUSG00000038759.15@ENSMUST00000201609.3	0.26203	0.60171	[1,2.4319]	(2.4319,4.2585]	2.43	3.21	0.833	12.77	0.005119	0.0261	2	2	-0.6182
ENSMUSG00000020777.16@ENSMUST00000130229.7	ENSMUSG00000020777.16@ENSMUST00000148601.1	0.2418	0.17264	[1,2.2481]	(2.2481,4.5529]	2.25	4.4	0.833	15.7	0.011163	0.0162	2	2	-0.4321
ENSMUSG00000021111.15@ENSMUST00000165584.7	ENSMUSG00000021111.15@ENSMUST00000170002.7	0.0148	0.00421	(2.0478,4.8935]	(4.8935,6.6607]	4.89	1.4	0.833	17.9	0.013932	0.0289	2	2	-0.3918
ENSMUSG00000020777.16@ENSMUST00000130229.7	ENSMUSG00000020777.16@ENSMUST00000148601.1	0.2418	0.17264	(2.2481,4.5529]	(4.5529,7]	4.55	3.07	0.833	19.2	0.016174	0.00273	2	3	-0.4321
ENSMUSG00000046679.16@ENSMUST00000113698.7	ENSMUSG00000046679.16@ENSMUST00000113700.7	0.17982	0.70393	[1,2.8335]	(2.8335,6.0086]	2.83	19.6	0.833	83.03	0.002884	0.026	2	4	-0.187
ENSMUSG00000045969.8@ENSMUST00000054399.5	ENSMUSG00000045969.8@ENSMUST00000209565.1	0.41311	0.3987	[1,2.6521]	(2.6521,6.7022]	2.65	31	0.833	84.91	0.002362	0.00285	2	4	-0.2394
ENSMUSG00000026558.13@ENSMUST00000027839.13	ENSMUSG00000026558.13@ENSMUST00000053686.8	0.4525	0.05319	[1,2.0044]	(2.0044,7]	2	2.72	0.833	109	0.029311	0.00534	2	5	0.7435
ENSMUSG00000036371.6@ENSMUST00000204206.1	ENSMUSG00000036371.6@ENSMUST00000204293.2	0.35201	0.3426	(1.1262,3.7969]	(3.7969,7]	3.8	319	0.833	135.29	0.004279	0.0101	2	4	0.5713
ENSMUSG00000029177.9@ENSMUST00000133316.7	ENSMUSG00000029177.9@ENSMUST00000199617.1	0.40146	0.18633	[1,2.0913]	(2.0913,7]	2.09	55.1	0.833	200.86	0.049291	4.41e-06	2	5	-0.0331
ENSMUSG00000079658.9@ENSMUST00000115352.9	ENSMUSG00000079658.9@ENSMUST00000186948.6	0.49279	0.47258	[1,2.5447]	(2.5447,4.7381]	2.54	204	0.833	300.47	0.014429	0.00606	2	2	0.6613
ENSMUSG00000027405.16@ENSMUST00000028890.14	ENSMUSG00000027405.16@ENSMUST00000159373.1	0.70306	0.03535	[1,2.3833]	(2.3833,7]	2.38	20.4	0.833	319.97	0.048731	2.91e-06	2	5	-0.4583
ENSMUSG00000027715.9@ENSMUST00000029270.9	ENSMUSG00000027715.9@ENSMUST00000147380.1	0.43573	0.56427	(2.2542,4.8693]	(4.8693,7]	4.87	154	0.833	430.77	0.012839	0.000337	2	3	0.3558
ENSMUSG00000008683.16@ENSMUST00000131374.7	ENSMUSG00000008683.16@ENSMUST00000131840.2	0.00905	0.02441	[1,2.1808]	(2.1808,7]	2.18	5.4	0.867	28.78	0.000525	0.000544	2	5	0.2299
ENSMUSG00000014074.17@ENSMUST00000014218.14	ENSMUSG00000014074.17@ENSMUST00000171474.1	0.15651	0.13088	[1,2.8878]	(2.8878,7]	2.89	12.1	0.867	34.84	0.007012	0.000988	2	5	-0.0591
ENSMUSG00000024188.15@ENSMUST00000025023.13	ENSMUSG00000024188.15@ENSMUST00000148894.1	0.31484	0.52646	[1,2.4996]	(2.4996,7]	2.5	14.6	0.867	37.46	0.002421	0.000343	2	5	-0.5098
ENSMUSG00000004980.16@ENSMUST00000090002.9	ENSMUSG00000004980.16@ENSMUST00000204188.2	0.1216	0.24433	[1,2.3541]	(2.3541,7]	2.35	28.5	0.867	65.71	0.008039	9.82e-05	2	5	-0.1118
ENSMUSG00000004980.16@ENSMUST00000069949.12	ENSMUSG00000004980.16@ENSMUST00000204188.2	0.19961	0.24433	[1,5.4119]	(5.4119,7]	5.41	43.6	0.867	73.5	0.000191	0.000371	5	2	-0.2905
ENSMUSG00000024096.16@ENSMUST00000024905.9	ENSMUSG00000024096.16@ENSMUST00000166543.8	0.27647	0.72353	[1,2.9955]	(2.9955,7]	3	83.2	0.867	397.42	0.000417	0.00775	2	5	0.7757
ENSMUSG00000027951.16@ENSMUST00000029563.13	ENSMUSG00000027951.16@ENSMUST00000107405.5	0.17081	0.08655	[1,3.7117]	(3.7117,7]	3.71	0.602	0.889	4.68	0.009587	0.000626	3	4	-0.4475
ENSMUSG00000028703.14@ENSMUST00000030471.8	ENSMUSG00000028703.14@ENSMUST00000133799.7	0.30734	0.21177	(2.7401,4.9564]	(4.9564,7]	4.96	6.2	0.889	21.91	0.024445	0.027	2	3	-0.2638
ENSMUSG00000026111.15@ENSMUST00000027285.12	ENSMUSG00000026111.15@ENSMUST00000114925.9	0.38192	0.42996	(2.0783,5.0456]	(5.0456,7]	5.05	10.8	0.889	71.38	0.037119	0.0134	3	2	0.8288
ENSMUSG00000030826.19@ENSMUST00000210811.1	ENSMUSG00000030826.19@ENSMUST00000211173.1	0.09369	0.90631	[1,2.9706]	(2.9706,5.6568]	2.97	3.25	0.889	72.35	0.02817	0.0468	2	3	-0.2876
ENSMUSG00000026111.15@ENSMUST00000114925.9	ENSMUSG00000026111.15@ENSMUST00000118059.2	0.42996	0.18812	(2.7932,5.0425]	(5.0425,7]	5.04	10.8	0.889	73.46	0.012472	0.0204	3	2	0.7445
ENSMUSG00000079658.9@ENSMUST00000115352.9	ENSMUSG00000079658.9@ENSMUST00000186948.6	0.49279	0.47258	(2.5447,4.7381]	(4.7381,7]	4.74	467	0.889	247.29	0.006057	0.0142	2	3	0.6613
ENSMUSG00000026111.15@ENSMUST00000114925.9	ENSMUSG00000026111.15@ENSMUST00000118059.2	0.42996	0.18812	[1,2.7932]	(2.7932,5.0425]	2.79	241	0.889	610.24	0.005363	0.0125	2	3	0.7445
ENSMUSG00000040952.16@ENSMUST00000108429.7	ENSMUSG00000040952.16@ENSMUST00000156372.7	0.35564	0.6105	(2.0095,4.2423]	(4.2423,7]	4.24	986	0.889	1736.37	0.01766	0.00672	2	3	0.4757
ENSMUSG00000030213.12@ENSMUST00000032335.12	ENSMUSG00000030213.12@ENSMUST00000203988.2	0.22084	0.60926	[1,2.1254]	(2.1254,6.7842]	2.13	15.8	0.917	31.36	0.045149	0.0151	2	4	0.0606
ENSMUSG00000027620.16@ENSMUST00000126992.7	ENSMUSG00000027620.16@ENSMUST00000155837.7	0.02642	0.03267	[1,2.314]	(2.314,7]	2.31	5.32	0.933	16.91	0.019808	0.00543	2	5	-0.3414
ENSMUSG00000006599.13@ENSMUST00000107644.1	ENSMUSG00000006599.13@ENSMUST00000165031.7	0.47659	0.52341	[1,2.6717]	(2.6717,7]	2.67	13.7	0.933	23.46	0.044302	0.0177	2	5	-0.1246
ENSMUSG00000109336.1@ENSMUST00000040531.8	ENSMUSG00000109336.1@ENSMUST00000208199.1	0.34941	0.65059	[1,2.5698]	(2.5698,7]	2.57	13.2	0.933	39.72	0.002115	1.5e-05	2	5	-0.6174
ENSMUSG00000004980.16@ENSMUST00000090002.9	ENSMUSG00000004980.16@ENSMUST00000203954.2	0.1216	0.0819	[1,2.6143]	(2.6143,7]	2.61	17.5	0.933	44.23	0.017432	0.00241	2	5	0.4575
ENSMUSG00000031226.13@ENSMUST00000033577.10	ENSMUSG00000031226.13@ENSMUST00000119477.1	0.81087	0.18913	[1,2.6713]	(2.6713,7]	2.67	8.38	0.933	47.28	0.004823	6.41e-05	2	5	-0.2824
ENSMUSG00000004980.16@ENSMUST00000069949.12	ENSMUSG00000004980.16@ENSMUST00000090002.9	0.19961	0.1216	[1,2.9592]	(2.9592,7]	2.96	3.01	0.933	81.78	0.009163	0.00013	2	5	-0.4828
ENSMUSG00000027620.16@ENSMUST00000109584.7	ENSMUSG00000027620.16@ENSMUST00000155837.7	0.1777	0.03267	[1,2.6347]	(2.6347,7]	2.63	10.6	0.933	86.78	0.03234	0.00187	2	5	-0.3145
ENSMUSG00000012405.15@ENSMUST00000079419.10	ENSMUSG00000012405.15@ENSMUST00000080281.13	0.17938	0.10147	[1,2.8247]	(2.8247,7]	2.82	33	0.933	109.13	0.009241	8.83e-05	2	5	0.6772
ENSMUSG00000000827.18@ENSMUST00000069712.8	ENSMUSG00000000827.18@ENSMUST00000108799.9	0.55335	0.41953	[1,2.9128]	(2.9128,7]	2.91	72.9	0.933	152.75	0.000269	0.00303	2	5	-0.1131
ENSMUSG00000008730.17@ENSMUST00000106845.8	ENSMUSG00000008730.17@ENSMUST00000137078.7	0.03664	0.03017	[1,2.6773]	(2.6773,4.1365]	2.68	0.688	1	1.71	0.035039	0.0139	2	2	-0.1108
ENSMUSG00000027620.16@ENSMUST00000146549.7	ENSMUSG00000027620.16@ENSMUST00000147098.7	0.01535	0.01821	(2.0856,4.4949]	(4.4949,7]	4.49	2.83	1	9.06	0.017571	0.00824	2	3	-0.233
ENSMUSG00000016481.15@ENSMUST00000075451.11	ENSMUSG00000016481.15@ENSMUST00000193094.5	0.42963	0.21467	(2.6591,4.8508]	(4.8508,7]	4.85	1.01	1	11.44	0.00227	0.00633	2	3	-0.1649
ENSMUSG00000027620.16@ENSMUST00000126992.7	ENSMUSG00000027620.16@ENSMUST00000146549.7	0.02642	0.01535	[1,2.4802]	(2.4802,4.8717]	2.48	4.08	1	18.16	0.019551	0.0171	2	2	-0.285
ENSMUSG00000016481.15@ENSMUST00000075451.11	ENSMUSG00000016481.15@ENSMUST00000193094.5	0.42963	0.21467	[1,2.6591]	(2.6591,4.8508]	2.66	8.62	1	22.09	0.007954	0.00227	2	2	-0.1649
ENSMUSG00000034329.16@ENSMUST00000044423.3	ENSMUSG00000034329.16@ENSMUST00000149748.7	0.40345	0.4811	[1,2.5937]	(2.5937,7]	2.59	15.3	1	36.34	0.008729	0.00105	2	5	-0.4017
ENSMUSG00000026219.14@ENSMUST00000186465.6	ENSMUSG00000026219.14@ENSMUST00000186648.6	0.53769	0.46231	(2.6295,4.8658]	(4.8658,7]	4.87	7.55	1	42.99	0.004471	0.00489	2	3	0.214
ENSMUSG00000004980.16@ENSMUST00000069949.12	ENSMUSG00000004980.16@ENSMUST00000203954.2	0.19961	0.0819	[1,3.5941]	(3.5941,7]	3.59	13.1	1	50.88	0.000339	0.000212	3	4	-0.7598
ENSMUSG00000060450.13@ENSMUST00000072376.11	ENSMUSG00000060450.13@ENSMUST00000170811.7	0.46085	0.49274	(2.3523,5.5524]	(5.5524,7]	5.55	8.39	1	55.91	0.002044	0.000575	3	2	0.3245
ENSMUSG00000063334.16@ENSMUST00000075924.7	ENSMUSG00000063334.16@ENSMUST00000174653.1	0.65369	0.27347	[1,2.555]	(2.555,7]	2.55	32.8	1	60.07	0.014998	4.98e-07	2	5	-0.4313
ENSMUSG00000004980.16@ENSMUST00000203220.2	ENSMUSG00000004980.16@ENSMUST00000204188.2	0.26482	0.24433	(2.0201,5.6527]	(5.6527,7]	5.65	33.6	1	65.79	0.000961	0.00562	3	2	-0.4032
ENSMUSG00000025277.13@ENSMUST00000026313.3	ENSMUSG00000025277.13@ENSMUST00000166497.7	0.26735	0.73265	[1,2.2242]	(2.2242,5.9929]	2.22	27.8	1	95.06	0.000296	0.00446	2	3	-0.3198
ENSMUSG00000060450.13@ENSMUST00000072376.11	ENSMUSG00000060450.13@ENSMUST00000170811.7	0.46085	0.49274	[1,2.3523]	(2.3523,5.5524]	2.35	90.6	1	105.25	0.037959	0.00204	2	3	0.3245
ENSMUSG00000037885.18@ENSMUST00000165413.8	ENSMUSG00000037885.18@ENSMUST00000166282.2	0.69213	0.30787	[1,2.213]	(2.213,6.9895]	2.21	39.2	1	109.53	0.001435	0.00615	2	4	-0.1729
ENSMUSG00000031939.15@ENSMUST00000034415.5	ENSMUSG00000031939.15@ENSMUST00000164079.7	0.24748	0.75252	[1,2.0891]	(2.0891,7]	2.09	22.9	1	115.84	0.001869	3.65e-05	2	5	0.8221
ENSMUSG00000029247.17@ENSMUST00000117536.7	ENSMUSG00000029247.17@ENSMUST00000120912.7	0.09573	0.90427	[1,2.1162]	(2.1162,7]	2.12	23.3	1	142.98	0.017898	1.67e-08	2	5	-0.6444
ENSMUSG00000022884.14@ENSMUST00000115341.9	ENSMUSG00000022884.14@ENSMUST00000123413.7	0.26355	0.18683	[1,2.8124]	(2.8124,6.9912]	2.81	29	1	144.55	0.000164	9.65e-06	2	4	-0.5878
ENSMUSG00000034349.14@ENSMUST00000042901.14	ENSMUSG00000034349.14@ENSMUST00000136502.7	0.15791	0.68691	[1,4.8592]	(4.8592,7]	4.86	6.47	1	295.63	0.00568	0.00377	4	3	0.9755
ENSMUSG00000029177.9@ENSMUST00000133316.7	ENSMUSG00000029177.9@ENSMUST00000144742.5	0.40146	0.31474	[1,2.6173]	(2.6173,7]	2.62	141	1	297.02	0.000463	2.74e-05	2	5	-0.4768
ENSMUSG00000028410.13@ENSMUST00000030118.9	ENSMUSG00000028410.13@ENSMUST00000137246.7	0.67139	0.25174	[1,2.7878]	(2.7878,7]	2.79	101	1	476.74	0.011155	2.06e-05	2	5	-0.0527
ENSMUSG00000012405.15@ENSMUST00000080281.13	ENSMUSG00000012405.15@ENSMUST00000100799.8	0.10147	0.71915	[1,2.1259]	(2.1259,7]	2.13	47.4	1	556.13	0.021535	1.55e-05	2	5	0.5355
ENSMUSG00000031812.16@ENSMUST00000034270.16	ENSMUSG00000031812.16@ENSMUST00000181948.1	0.08904	0.34831	[1,2.0653]	(2.0653,6.871]	2.07	74.2	1	1437.39	0.002559	4.1e-06	2	4	0.6098

## Sheet: ISsBetween2-cellAnd4-cell
iso1	iso2	iso1.mean.ratio	iso2.mean.ratio	before.interval	after.interval	x.value	y.value	prob	diff	before.pval	after.pval	before.t.points	after.t.points	cor
ENSMUSG00000063334.16@ENSMUST00000075924.7	ENSMUSG00000063334.16@ENSMUST00000174653.1	0.6537	0.2735	[1,2.555]	(2.555,7]	2.55	32.82	1	60.07	0.015	4.98e-07	2	5	-0.4313
ENSMUSG00000060450.13@ENSMUST00000072376.11	ENSMUSG00000060450.13@ENSMUST00000170811.7	0.4609	0.4927	[1,2.3523]	(2.3523,5.5524]	2.35	90.64	1	105.25	0.038	0.00204	2	3	0.3245
ENSMUSG00000060450.13@ENSMUST00000072376.11	ENSMUSG00000060450.13@ENSMUST00000170811.7	0.4609	0.4927	(2.3523,5.5524]	(5.5524,7]	5.55	8.39	1	55.91	0.00204	0.000575	3	2	0.3245
ENSMUSG00000032497.15@ENSMUST00000098340.6	ENSMUSG00000032497.15@ENSMUST00000197241.4	0.15	0.206	[1,3.6579]	(3.6579,7]	3.66	3.96	1	25.74	0.00878	4.37e-05	3	4	-0.5165
ENSMUSG00000026974.11@ENSMUST00000028350.8	ENSMUSG00000026974.11@ENSMUST00000148042.2	0.5491	0.4509	[1,3.4443]	(3.4443,7]	3.44	64.79	1	67.96	0.023	0.00357	3	4	0.127
ENSMUSG00000021687.14@ENSMUST00000022197.14	ENSMUSG00000021687.14@ENSMUST00000152555.7	0.3357	0.6643	[1,3.8469]	(3.8469,7]	3.85	13.81	1	67.09	0.00703	5.09e-06	3	4	0.4522
ENSMUSG00000021270.13@ENSMUST00000094361.10	ENSMUSG00000021270.13@ENSMUST00000155242.7	0.0889	0.9111	[1,3.9324]	(3.9324,7]	3.93	16.99	1	3062.65	0.00365	4.36e-05	3	4	0.94
ENSMUSG00000020358.17@ENSMUST00000074669.9	ENSMUSG00000020358.17@ENSMUST00000101249.8	0.7752	0.2248	[1,2.0963]	(2.0963,7]	2.1	40.42	1	287.55	0.000809	3.83e-10	2	5	0.5248
ENSMUSG00000011960.12@ENSMUST00000012104.6	ENSMUSG00000011960.12@ENSMUST00000169707.7	0.221	0.4921	[1,2.6125]	(2.6125,7]	2.61	8.25	1	24.1	0.0296	1.38e-06	2	5	-0.5346
ENSMUSG00000007656.13@ENSMUST00000169492.7	ENSMUSG00000007656.13@ENSMUST00000170308.7	0.2484	0.6813	[1,3.3804]	(3.3804,7]	3.38	8.56	1	126.8	0.00233	0.000141	3	4	-0.5817
ENSMUSG00000090137.8@ENSMUST00000129909.7	ENSMUSG00000090137.8@ENSMUST00000135446.7	0.3972	0.2465	(2,3.8216]	(3.8216,7]	3.82	345.69	0.917	450.8	0.0308	0.00329	2	4	0.2819
ENSMUSG00000033102.14@ENSMUST00000109769.8	ENSMUSG00000033102.14@ENSMUST00000109770.1	0.5155	0.4845	[1,3.7003]	(3.7003,7]	3.7	39.57	0.917	28.55	0.0165	0.00203	3	4	0.4766
ENSMUSG00000032497.15@ENSMUST00000196981.4	ENSMUSG00000032497.15@ENSMUST00000197241.4	0.6018	0.206	[1,3.8119]	(3.8119,7]	3.81	4.73	0.917	57.49	0.00405	0.00415	3	4	-0.5448
ENSMUSG00000026434.12@ENSMUST00000062264.7	ENSMUSG00000026434.12@ENSMUST00000189946.6	0.6113	0.3887	[1,3.9314]	(3.9314,7]	3.93	11.12	0.917	34.39	0.000155	0.00229	3	4	-0.5015
ENSMUSG00000047648.13@ENSMUST00000070300.4	ENSMUSG00000047648.13@ENSMUST00000129456.7	0.5137	0.4863	[1,3.0983]	(3.0983,7]	3.1	3.96	0.889	20.76	0.032	0.00876	3	4	0.3562
ENSMUSG00000039789.7@ENSMUST00000090522.4	ENSMUSG00000039789.7@ENSMUST00000119599.2	0.4383	0.5617	[1,3.7797]	(3.7797,7]	3.78	2.16	0.889	5.53	0.0189	0.000169	3	4	0.4679
ENSMUSG00000034088.15@ENSMUST00000042498.13	ENSMUSG00000034088.15@ENSMUST00000170883.7	0.4886	0.5114	[1,3.6548]	(3.6548,6.8418]	3.65	31.49	0.889	63.69	0.02	1.35e-05	3	3	-0.44
ENSMUSG00000029405.16@ENSMUST00000167918.7	ENSMUSG00000029405.16@ENSMUST00000202258.3	0.2417	0.3133	[1,3.2618]	(3.2618,7]	3.26	51.61	0.889	173.11	0.00539	2.15e-05	3	4	-0.1345
ENSMUSG00000022940.16@ENSMUST00000113910.7	ENSMUSG00000022940.16@ENSMUST00000113917.7	0.2109	0.281	[1,3.3021]	(3.3021,7]	3.3	17.37	0.889	70.18	0.00424	3.06e-06	3	4	-0.7582
ENSMUSG00000021870.17@ENSMUST00000112330.7	ENSMUSG00000021870.17@ENSMUST00000145738.7	0.2588	0.555	[1,3.4723]	(3.4723,7]	3.47	20.69	0.889	34.9	0.0192	5.37e-06	3	4	-0.0128
ENSMUSG00000038696.14@ENSMUST00000113123.7	ENSMUSG00000038696.14@ENSMUST00000149383.7	0.1057	0.1893	[1,3.4539]	(3.4539,7]	3.45	12.29	0.833	27.47	0.00126	0.00977	3	4	-0.0659
ENSMUSG00000036391.16@ENSMUST00000064297.4	ENSMUSG00000036391.16@ENSMUST00000147255.1	0.1046	0.31	[1,2.2665]	(2.2665,7]	2.27	6.03	0.833	11.51	0.0148	0.0155	2	5	0.3026
ENSMUSG00000022940.16@ENSMUST00000113906.8	ENSMUSG00000022940.16@ENSMUST00000113917.7	0.3936	0.281	[1,3.2936]	(3.2936,7]	3.29	17.21	0.806	89.92	0.00612	0.000148	3	4	-0.7275
ENSMUSG00000020288.13@ENSMUST00000020529.12	ENSMUSG00000020288.13@ENSMUST00000128372.7	0.4608	0.5392	[1,3.4973]	(3.4973,7]	3.5	9.6	0.806	32.35	0.0105	8.82e-05	3	4	-0.344
ENSMUSG00000039166.15@ENSMUST00000041984.13	ENSMUSG00000039166.15@ENSMUST00000176258.7	0.6134	0.3866	[1,3.7972]	(3.7972,6.8534]	3.8	24.92	0.778	33.17	0.00129	0.0185	3	3	0.1703
ENSMUSG00000038696.14@ENSMUST00000113123.7	ENSMUSG00000038696.14@ENSMUST00000147337.7	0.1057	0.3044	[1,3.5926]	(3.5926,6.5897]	3.59	16.05	0.778	47.06	4.98e-05	0.019	3	3	-0.438
ENSMUSG00000022940.16@ENSMUST00000113905.7	ENSMUSG00000022940.16@ENSMUST00000113917.7	0.0764	0.281	[1,2.7597]	(2.7597,7]	2.76	9.23	0.767	48.45	0.0254	1.31e-05	2	5	-0.617
ENSMUSG00000003824.12@ENSMUST00000003922.5	ENSMUSG00000003824.12@ENSMUST00000170296.1	0.4671	0.4166	(1.2927,3.7958]	(3.7958,7]	3.8	163.86	0.75	159.31	0.0206	0.0415	2	4	0.8583
ENSMUSG00000035632.16@ENSMUST00000135977.7	ENSMUSG00000035632.16@ENSMUST00000143085.7	0.047	0.102	[1,2.9338]	(2.9338,7]	2.93	1.68	0.733	8.59	0.00146	0.00824	2	5	-0.3682
ENSMUSG00000024856.10@ENSMUST00000172914.1	ENSMUSG00000024856.10@ENSMUST00000174799.1	0.0672	0.081	[1,2.5548]	(2.5548,7]	2.55	62.35	0.733	80.02	0.0246	0.0345	2	5	0.6837
ENSMUSG00000042489.15@ENSMUST00000048391.14	ENSMUSG00000042489.15@ENSMUST00000147675.1	0.3829	0.6142	[1,3.4418]	(3.4418,7]	3.44	24.69	0.694	42.59	0.0264	0.0342	3	4	0.7654
ENSMUSG00000011960.12@ENSMUST00000168928.7	ENSMUSG00000011960.12@ENSMUST00000169707.7	0.2869	0.4921	[1,3.1328]	(3.1328,7]	3.13	13.55	0.667	16.66	0.0405	7.5e-05	3	4	-0.2508
ENSMUSG00000007656.13@ENSMUST00000164467.7	ENSMUSG00000007656.13@ENSMUST00000169492.7	0.0554	0.2484	[1,3.9434]	(3.9434,6.6577]	3.94	1.57	0.667	39.04	0.00117	0.0242	3	3	0.5815
ENSMUSG00000006262.15@ENSMUST00000006424.7	ENSMUSG00000006262.15@ENSMUST00000113229.7	0.5744	0.2643	[1,4.5716]	(4.5716,7]	4.57	12.75	0.611	22.68	0.00264	0.0366	4	3	-0.0893
ENSMUSG00000028923.14@ENSMUST00000030760.14	ENSMUSG00000028923.14@ENSMUST00000149178.7	0.7841	0.0316	[1,2.0726]	(2.0726,7]	2.07	5.32	0.6	72.06	0.0483	0.00108	2	5	-0.3063
ENSMUSG00000034300.16@ENSMUST00000049281.11	ENSMUSG00000034300.16@ENSMUST00000097622.3	0.4314	0.5686	[1,3.5279]	(3.5279,6.0464]	3.53	16.5	0.556	23.39	0.0143	0.0499	3	3	0.5962

## Sheet: ISsBetween4-cellAnd8-cell
iso1	iso2	iso1.mean.ratio	iso2.mean.ratio	before.interval	after.interval	x.value	y.value	prob	diff	before.pval	after.pval	before.t.points	after.t.points	cor
ENSMUSG00000034349.14@ENSMUST00000042901.14	ENSMUSG00000034349.14@ENSMUST00000136502.7	0.158	0.6869	[1,4.8592]	(4.8592,7]	4.86	6.47	1	295.63	0.00568	0.00377	4	3	0.97554
ENSMUSG00000029203.16@ENSMUST00000201292.3	ENSMUSG00000029203.16@ENSMUST00000202601.3	0.616	0.2918	[1,4.4714]	(4.4714,7]	4.47	77.9	1	230.77	0.000136	0.000301	4	3	0.11448
ENSMUSG00000027620.16@ENSMUST00000109584.7	ENSMUSG00000027620.16@ENSMUST00000152919.2	0.179	0.1161	[1,2.3266]	(2.3266,7]	2.33	16.6	1	101.18	0.032093	0.000552	2	5	-0.34817
ENSMUSG00000019761.10@ENSMUST00000103131.4	ENSMUSG00000019761.10@ENSMUST00000211768.1	0.251	0.7493	[1,2.4668]	(2.4668,4.1312]	2.47	2.49	1	15.2	0.033784	0.0294	2	2	0.65074
ENSMUSG00000019761.10@ENSMUST00000103131.4	ENSMUSG00000019761.10@ENSMUST00000211768.1	0.251	0.7493	(2.4668,4.1312]	(4.1312,7]	4.13	1.4	1	7	0.029435	0.00293	2	3	0.65074
ENSMUSG00000027620.16@ENSMUST00000109584.7	ENSMUSG00000027620.16@ENSMUST00000155837.7	0.179	0.0329	[1,2.6347]	(2.6347,7]	2.63	10.6	0.933	86.78	0.03234	0.00187	2	5	-0.31453
ENSMUSG00000090137.8@ENSMUST00000129909.7	ENSMUSG00000090137.8@ENSMUST00000135446.7	0.399	0.2476	(2,3.8216]	(3.8216,7]	3.82	346	0.917	450.8	0.030762	0.00329	2	4	0.28192
ENSMUSG00000037608.15@ENSMUST00000092678.9	ENSMUSG00000037608.15@ENSMUST00000185800.6	0.32	0.5519	[1,4.5431]	(4.5431,7]	4.54	22.6	0.917	39.91	0.00176	0.000104	4	3	0.00237
ENSMUSG00000003721.14@ENSMUST00000003818.13	ENSMUSG00000003721.14@ENSMUST00000160968.7	0.525	0.3014	[1,4.3941]	(4.3941,7]	4.39	1.57	0.917	11.29	0.023125	0.00255	4	3	-0.19115
ENSMUSG00000014074.17@ENSMUST00000014218.14	ENSMUSG00000014074.17@ENSMUST00000171474.1	0.157	0.1309	[1,2.8878]	(2.8878,7]	2.89	12.1	0.867	34.84	0.007012	0.000988	2	5	-0.05906
ENSMUSG00000038759.15@ENSMUST00000043815.15	ENSMUSG00000038759.15@ENSMUST00000201609.3	0.262	0.6017	[1,2.4319]	(2.4319,4.2585]	2.43	3.21	0.833	12.77	0.005119	0.0261	2	2	-0.61822
ENSMUSG00000028274.17@ENSMUST00000029942.7	ENSMUSG00000028274.17@ENSMUST00000108153.8	0.585	0.4147	[1,4.5848]	(4.5848,7]	4.58	10.4	0.833	12.34	0.002338	3.98e-05	4	3	0.68123
ENSMUSG00000020362.13@ENSMUST00000020624.6	ENSMUSG00000020362.13@ENSMUST00000145353.7	0.546	0.4541	[1,4.4518]	(4.4518,7]	4.45	9.36	0.833	21.06	0.000676	3.11e-05	4	3	0.13866
ENSMUSG00000008690.15@ENSMUST00000036987.11	ENSMUSG00000008690.15@ENSMUST00000147733.1	0.171	0.4315	[1,2.3553]	(2.3553,4.1951]	2.36	4.22	0.833	16.38	0.001462	0.0449	2	2	0.42066
ENSMUSG00000008690.15@ENSMUST00000036987.11	ENSMUSG00000008690.15@ENSMUST00000147733.1	0.171	0.4315	(2.3553,4.1951]	(4.1951,7]	4.2	14.6	0.833	44.98	0.044885	5.01e-05	2	3	0.42066
ENSMUSG00000037600.16@ENSMUST00000105901.1	ENSMUSG00000037600.16@ENSMUST00000153811.1	0.34	0.134	[1,4.5016]	(4.5016,6.2774]	4.5	2	0.75	8.11	0.004198	0.00672	4	2	-0.32607
ENSMUSG00000038759.15@ENSMUST00000043815.15	ENSMUSG00000038759.15@ENSMUST00000201609.3	0.262	0.6017	(2.4319,4.2585]	(4.2585,7]	4.26	3.98	0.722	11.43	0.026105	0.00255	2	3	-0.61822
ENSMUSG00000026669.14@ENSMUST00000027980.7	ENSMUSG00000026669.14@ENSMUST00000102985.7	0.681	0.3193	[1,4.9021]	(4.9021,7]	4.9	0.76	0.722	6.56	0.042471	0.0433	4	3	0.27244
ENSMUSG00000020899.15@ENSMUST00000021282.11	ENSMUSG00000020899.15@ENSMUST00000172915.7	0.487	0.5134	(2,4.7038]	(4.7038,7]	4.7	0.843	0.611	2.3	0.039805	0.0104	3	3	-0.0304
ENSMUSG00000006262.15@ENSMUST00000006424.7	ENSMUSG00000006262.15@ENSMUST00000113229.7	0.574	0.2643	[1,4.5716]	(4.5716,7]	4.57	12.8	0.611	22.68	0.002636	0.0366	4	3	-0.08926
ENSMUSG00000027620.16@ENSMUST00000109584.7	ENSMUSG00000027620.16@ENSMUST00000146297.7	0.179	0.0761	[1,3.9999]	(3.9999,7]	4	0.000231	0.556	73.17	0.036273	0.0146	3	4	-0.27629
ENSMUSG00000008690.15@ENSMUST00000036987.11	ENSMUSG00000008690.15@ENSMUST00000147207.7	0.171	0.084	[1,2.181]	(2.181,5.607]	2.18	2.17	0.556	14.15	0.033955	0.0067	2	3	0.17384

## Sheet: ISsBetween8-cellAndMorular
iso1	iso2	iso1.mean.ratio	iso2.mean.ratio	before.interval	after.interval	x.value	y.value	prob	diff	before.pval	after.pval	before.t.points	after.t.points	cor
ENSMUSG00000094817.8@ENSMUST00000163305.7	ENSMUSG00000094817.8@ENSMUST00000184577.2	0.582	0.418	[1,2.6508]	(2.6508,5.9206]	2.65	98.067	1	312.5	0.004162	0.000244	2	3	-0.3971
ENSMUSG00000004980.16@ENSMUST00000203220.2	ENSMUSG00000004980.16@ENSMUST00000204188.2	0.363	0.334	(2.0201,5.6527]	(5.6527,7]	5.65	33.556	1	65.8	0.000961	0.00562	3	2	-0.4032
ENSMUSG00000034390.15@ENSMUST00000095172.4	ENSMUSG00000034390.15@ENSMUST00000166750.7	0.377	0.623	[1,5.2465]	(5.2465,7]	5.25	2.518	0.933	12.6	0.00719	0.0417	5	2	0.5062
ENSMUSG00000027809.14@ENSMUST00000120992.7	ENSMUSG00000027809.14@ENSMUST00000149511.1	0.453	0.472	[1,5.1625]	(5.1625,7]	5.16	0.868	0.933	11.2	0.00014	0.0168	5	2	-0.4077
ENSMUSG00000024667.11@ENSMUST00000025569.8	ENSMUSG00000024667.11@ENSMUST00000059582.8	0.411	0.266	[1,5.4866]	(5.4866,7]	5.49	6.774	0.933	17.5	0.003438	0.0156	5	2	0.6033
ENSMUSG00000020358.17@ENSMUST00000074669.9	ENSMUSG00000020358.17@ENSMUST00000109103.3	0.58	0.42	[1,2.239]	(2.239,7]	2.24	79.002	0.933	158.5	0.000635	2.84e-07	2	5	0.8942
ENSMUSG00000004980.16@ENSMUST00000069949.12	ENSMUSG00000004980.16@ENSMUST00000204188.2	0.273	0.334	[1,5.4119]	(5.4119,7]	5.41	43.636	0.867	73.5	0.000191	0.000371	5	2	-0.2905
ENSMUSG00000049643.15@ENSMUST00000067386.13	ENSMUSG00000049643.15@ENSMUST00000187960.6	0.561	0.439	(2.23,5.2921]	(5.2921,7]	5.29	6.688	0.778	20.7	0.014691	4.39e-05	3	2	0.0621
ENSMUSG00000004980.16@ENSMUST00000069949.12	ENSMUSG00000004980.16@ENSMUST00000203220.2	0.273	0.363	[1,2.8794]	(2.8794,7]	2.88	3.094	0.567	59.4	0.029934	0.0188	2	5	0.1145

## Sheet: ISsBetweenMorularAndBlastocyst
iso1	iso2	iso1.mean.ratio	iso2.mean.ratio	before.interval	after.interval	x.value	y.value	prob	diff	before.pval	after.pval	before.t.points	after.t.points	cor
ENSMUSG00000060475.12@ENSMUST00000007007.13	ENSMUSG00000060475.12@ENSMUST00000160781.7	0.1099	0.25607	[1,2.5619]	(2.5619,7]	2.56	57.121	1	177.2	0.016046	1.39e-05	2	5	-0.5589
ENSMUSG00000060450.13@ENSMUST00000072376.11	ENSMUSG00000060450.13@ENSMUST00000170811.7	0.4609	0.49274	[1,2.3523]	(2.3523,5.5524]	2.35	90.64	1	105.2	0.037959	0.00204	2	3	0.3245
ENSMUSG00000060450.13@ENSMUST00000072376.11	ENSMUSG00000060450.13@ENSMUST00000170811.7	0.4609	0.49274	(2.3523,5.5524]	(5.5524,7]	5.55	8.392	1	55.9	0.002044	0.000575	3	2	0.3245
ENSMUSG00000032497.15@ENSMUST00000098340.6	ENSMUSG00000032497.15@ENSMUST00000197241.4	0.1483	0.20379	[1,3.6579]	(3.6579,7]	3.66	3.964	1	25.7	0.008776	4.37e-05	3	4	-0.5165
ENSMUSG00000029422.14@ENSMUST00000182309.7	ENSMUSG00000029422.14@ENSMUST00000182948.7	0.167	0.39018	[1,2.3262]	(2.3262,7]	2.33	40.112	1	84.4	0.000787	7.77e-06	2	5	0.1296
ENSMUSG00000029422.14@ENSMUST00000057795.11	ENSMUSG00000029422.14@ENSMUST00000182948.7	0.0331	0.39018	[1,2.03]	(2.03,7]	2.03	6.433	1	66.7	0.028154	3.84e-05	2	5	-0.172
ENSMUSG00000029177.9@ENSMUST00000133316.7	ENSMUSG00000029177.9@ENSMUST00000144742.5	0.2934	0.23004	[1,2.6173]	(2.6173,7]	2.62	141.356	1	297	0.000463	2.74e-05	2	5	-0.4768
ENSMUSG00000028693.15@ENSMUST00000030457.11	ENSMUSG00000028693.15@ENSMUST00000081182.4	0.2669	0.34691	[1,2.7533]	(2.7533,6.9683]	2.75	95.286	1	302.8	0.008313	1.77e-05	2	4	-0.5653
ENSMUSG00000028693.15@ENSMUST00000030456.13	ENSMUSG00000028693.15@ENSMUST00000081182.4	0.3385	0.34691	[1,2.9171]	(2.9171,7]	2.92	115.905	1	313.5	0.004515	0.000107	2	5	-0.4249
ENSMUSG00000023008.18@ENSMUST00000081224.13	ENSMUSG00000023008.18@ENSMUST00000088233.12	0.0878	0.70907	[1,3.8335]	(3.8335,6.2364]	3.83	6.137	1	41.4	0.002829	0.0369	3	3	-0.0756
ENSMUSG00000020720.13@ENSMUST00000021063.12	ENSMUSG00000020720.13@ENSMUST00000106750.4	0.5236	0.47466	[1,2.7969]	(2.7969,4.917]	2.8	43.582	1	57.4	0.022379	0.0328	2	2	0.1093
ENSMUSG00000020415.16@ENSMUST00000020687.14	ENSMUSG00000020415.16@ENSMUST00000101340.10	0.3453	0.6293	(1.8987,5.5758]	(5.5758,7]	5.58	62.773	1	370.3	0.015208	0.0216	4	2	0.758
ENSMUSG00000033102.14@ENSMUST00000109769.8	ENSMUSG00000033102.14@ENSMUST00000109770.1	0.5155	0.48454	[1,3.7003]	(3.7003,7]	3.7	39.57	0.917	28.6	0.016465	0.00203	3	4	0.4766
ENSMUSG00000032497.15@ENSMUST00000196981.4	ENSMUSG00000032497.15@ENSMUST00000197241.4	0.5952	0.20379	[1,3.8119]	(3.8119,7]	3.81	4.728	0.917	57.5	0.004054	0.00415	3	4	-0.5448
ENSMUSG00000029177.9@ENSMUST00000031073.9	ENSMUSG00000029177.9@ENSMUST00000144742.5	0.2261	0.23004	[1,2.6429]	(2.6429,6.3656]	2.64	138.238	0.917	172.4	0.005876	0.000235	2	4	0.1876
ENSMUSG00000026434.12@ENSMUST00000062264.7	ENSMUSG00000026434.12@ENSMUST00000189946.6	0.6113	0.38873	[1,3.9314]	(3.9314,7]	3.93	11.125	0.917	34.4	0.000155	0.00229	3	4	-0.5015
ENSMUSG00000052155.5@ENSMUST00000063886.3	ENSMUSG00000052155.5@ENSMUST00000156681.1	0.4073	0.59265	[1,2.1528]	(2.1528,4.7565]	2.15	3.017	0.833	10.1	0.008214	0.0375	2	2	0.6529
ENSMUSG00000042719.17@ENSMUST00000042163.14	ENSMUSG00000042719.17@ENSMUST00000151458.3	0.326	0.2693	[1,3.5124]	(3.5124,7]	3.51	5.877	0.833	14	0.000733	0.00347	3	4	-0.5106
ENSMUSG00000029177.9@ENSMUST00000133316.7	ENSMUSG00000029177.9@ENSMUST00000199617.1	0.2934	0.13619	[1,2.0913]	(2.0913,7]	2.09	55.146	0.833	200.9	0.049291	4.41e-06	2	5	-0.0331
ENSMUSG00000001289.12@ENSMUST00000062492.10	ENSMUSG00000001289.12@ENSMUST00000170627.7	0.2508	0.14544	[1,2.559]	(2.559,4.6813]	2.56	16.269	0.833	44.8	0.009916	0.0383	2	2	-0.3014
ENSMUSG00000037536.13@ENSMUST00000043112.7	ENSMUSG00000037536.13@ENSMUST00000168833.7	0.2822	0.71779	[1,3.2913]	(3.2913,7]	3.29	27.246	0.806	72.7	0.005401	0.0113	3	4	-0.3516
ENSMUSG00000028693.15@ENSMUST00000030456.13	ENSMUSG00000028693.15@ENSMUST00000030457.11	0.3385	0.26693	[1,4.7041]	(4.7041,7]	4.7	28.858	0.806	72.9	0.000105	0.00108	4	3	0.923
ENSMUSG00000003824.12@ENSMUST00000144466.1	ENSMUSG00000003824.12@ENSMUST00000170296.1	0.3413	0.27444	[1,3.8307]	(3.8307,7]	3.83	163.397	0.778	196.9	0.015274	0.000137	3	4	0.9381
ENSMUSG00000042719.17@ENSMUST00000042163.14	ENSMUSG00000042719.17@ENSMUST00000173895.7	0.326	0.36594	[1,3.1932]	(3.1932,7]	3.19	3.615	0.778	21.1	0.008385	0.000341	3	4	-0.5467
ENSMUSG00000041718.15@ENSMUST00000144185.4	ENSMUSG00000041718.15@ENSMUST00000197316.4	0.0259	0.0415	[1,3.8458]	(3.8458,6.9382]	3.85	2.029	0.778	10.4	0.000165	0.0168	3	3	-0.5318
ENSMUSG00000030880.14@ENSMUST00000033173.14	ENSMUSG00000030880.14@ENSMUST00000106483.3	0.0924	0.71576	[1,2.0196]	(2.0196,7]	2.02	0.457	0.767	18.4	0.033832	7.71e-05	2	5	0.0609
ENSMUSG00000025423.15@ENSMUST00000114776.2	ENSMUSG00000025423.15@ENSMUST00000114777.8	0.444	0.55255	[1,2.6285]	(2.6285,6.056]	2.63	17.065	0.75	14.5	0.010948	0.0216	2	4	-0.0262
ENSMUSG00000003824.12@ENSMUST00000003922.5	ENSMUSG00000003824.12@ENSMUST00000170296.1	0.3077	0.27444	(1.2927,3.7958]	(3.7958,7]	3.8	163.865	0.75	159.3	0.020553	0.0415	2	4	0.8583
ENSMUSG00000032497.15@ENSMUST00000197241.4	ENSMUSG00000032497.15@ENSMUST00000197256.4	0.2038	0.00975	[1,2.6143]	(2.6143,7]	2.61	0.429	0.7	12.1	0.023147	0.000155	2	5	-0.2925
ENSMUSG00000015357.10@ENSMUST00000015501.10	ENSMUSG00000015357.10@ENSMUST00000113824.7	0.5404	0.45323	[1,4.458]	(4.458,6.4822]	4.46	69.189	0.667	39.7	0.023909	0.0426	4	2	0.595
ENSMUSG00000035227.7@ENSMUST00000207406.1	ENSMUSG00000035227.7@ENSMUST00000208939.1	0.0758	0.03377	[1,3.1026]	(3.1026,6.5526]	3.1	1.871	0.667	19.3	0.02749	0.00853	3	3	-0.493
ENSMUSG00000035227.7@ENSMUST00000207063.1	ENSMUSG00000035227.7@ENSMUST00000207406.1	0.056	0.07585	[1,2.9507]	(2.9507,6.7406]	2.95	2.629	0.667	30.8	0.007846	0.0109	2	4	-0.409
ENSMUSG00000029422.14@ENSMUST00000111515.7	ENSMUSG00000029422.14@ENSMUST00000182241.1	0.2308	0.04111	(2.8013,4.6265]	(4.6265,7]	4.63	5.286	0.667	39	0.010152	0.0295	2	3	-0.3518
ENSMUSG00000052915.14@ENSMUST00000037915.8	ENSMUSG00000052915.14@ENSMUST00000107485.7	0.6218	0.31299	[1,3.2542]	(3.2542,7]	3.25	17.268	0.639	45.1	0.004001	0.00977	3	4	-0.7176
ENSMUSG00000002052.6@ENSMUST00000002121.4	ENSMUSG00000002052.6@ENSMUST00000108314.2	0.624	0.37595	[1,4.6802]	(4.6802,7]	4.68	7.058	0.611	17.6	0.000247	0.0225	4	3	-0.6063
ENSMUSG00000041718.15@ENSMUST00000144185.4	ENSMUSG00000041718.15@ENSMUST00000154827.7	0.0259	0.06229	[1,4.4761]	(4.4761,7]	4.48	3.295	0.583	10.5	0.000169	0.0421	4	3	-0.4826
ENSMUSG00000029422.14@ENSMUST00000050827.13	ENSMUSG00000029422.14@ENSMUST00000111515.7	0.0534	0.23081	(2.8258,4.7963]	(4.7963,7]	4.8	6.518	0.556	39.1	0.000286	0.0467	2	3	-0.4216
